# Supplementary material for: N-Aminophthalimide-mediated aerobic deborohydroxylation of boronic acid in air
Source: Royal Society of Chemistry journal article supplement (doi:10.1039/d3qo01651j), 2023-11-21

## Supporting Information

for

### ***N*-Aminophthalimide-Mediated Aerobic Deborohydroxylation of Boronic Acid in Air**

Tao Chen,<sup>a,b</sup> Wenzheng Zhang,<sup>a</sup> Zhenxing Yan,<sup>a</sup> Ze-Feng Xu<sup>\*a,c</sup> and Chuan-Ying Li<sup>\*a</sup>

<sup>a</sup> School of Chemistry and Chemical Engineering, Key Laboratory of Surface & Interface Science of Polymer Materials of Zhejiang Province, Zhejiang Sci-Tech University, Xiasha West Higher Education District, Hangzhou, 310018, China.

<sup>b</sup> School of Materials Science and Engineering, Zhejiang Sci-Tech University, Xiasha West Higher Education District, Hangzhou, 310018, China

<sup>c</sup> Key Laboratory of Organofluorine Chemistry, Shanghai Institute of Organic Chemistry, Chinese Academy of Sciences, 345 Lingling Road, 200032 Shanghai, China

e-mail: xuzefeng@zstu.edu.cn; licy@zstu.edu.cn. Phone: (+86)-571-86843094

| Page    | Content                                                            |
|---------|--------------------------------------------------------------------|
| S2      | (A) General Information                                            |
| S3-S7   | (B) Optimization of Reaction Conditions                            |
| S8-S12  | (C) Computational details                                          |
| S13-S19 | (D) Procedures for starting materials                              |
| S19     | (E) General procedure for deborohydroxylation of arylboronic acids |
| S20-S27 | (F) Characterization of products                                   |
| S28     | (G) References                                                     |
| S29-S69 | (H) NMR spectra                                                    |

## **(A) General information**

All reactions were carried out by standard procedures under air condition at room temperature unless stated otherwise. All boronic acid materials are commercially available unless stated otherwise. All solvents were freshly distilled prior to use in synthesis unless otherwise noted. Flash column chromatography was performed using silica gel (200-300 mesh).  $^1\text{H}$ ,  $^{13}\text{C}$  and  $^{19}\text{F}$  NMR spectra were measured on Bruker Avance IIDMX 400 MHz spectrometers (400 MHz for  $^1\text{H}$  NMR, 101 MHz for  $^{13}\text{C}$  NMR and 289 MHz for  $^{19}\text{F}$  NMR). Chemical shifts are reported in parts per million (ppm) relative to TMS (0.00) for the  $^1\text{H}$  NMR, residual signals in solvents ( $\text{CDCl}_3$  at  $\delta$  77.16 ppm) for the  $^{13}\text{C}$  NMR and  $\text{CDF}_3$  (0.00 ppm) for the  $^{19}\text{F}$  NMR measurements. Coupling constant ( $J$ ) are quoted in Hz.

## (B) Optimization of Reaction Conditions

### 1. Base Optimization

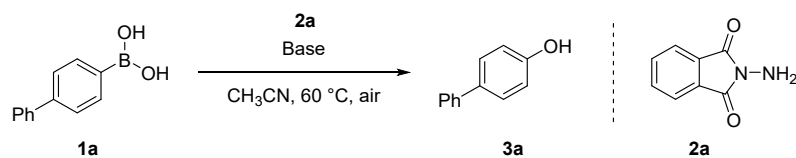

Under air atmosphere, dry  $\text{CH}_3\text{CN}$  (2.0 mL) was added to an oven-dried reaction tube charged with arylboronic acid **1a** (1.0 equiv, 0.2 mmol), *N*-aminophthalimide **2a** (1.2 equiv, 0.24 mmol), Base (1.2 equiv, 0.24 mmol) and a stirring bar; then the reaction mixture was stirred at  $60\text{ }^\circ\text{C}$  heated by oil bath. Upon the completion of the reaction, the mixture was cooled to room temperature and quenched with saturated aqueous  $\text{NH}_4\text{Cl}$  (4 mL). The mixture was then extracted with diethyl ether (10 mL) for three times. The combined organic phase was continually washed with 10 mL brine, dried over  $\text{MgSO}_4$ , filtered, and concentrated under reduced pressure. The resulting residue was purified by flash column chromatography to give the desired product **3a**.

**Table S1.** Base Optimization.

| Entry    | Base                     | Time (h)  | Yield of <b>3a</b><br>(%) |
|----------|--------------------------|-----------|---------------------------|
| <b>1</b> | <b>DBU</b>               | <b>22</b> | <b>67</b>                 |
| 2        | DABCO                    | 24        | trace                     |
| 3        | $\text{Et}_3\text{N}$    | 24        | 0                         |
| 4        | $\text{K}_2\text{CO}_3$  | 24        | 0                         |
| 5        | $\text{Cs}_2\text{CO}_3$ | 24        | 12                        |
| 6        | <i>t</i> -BuOK           | 24        | 0                         |
| 7        | KOH                      | 24        | 0                         |

### 2. Solvent Optimization

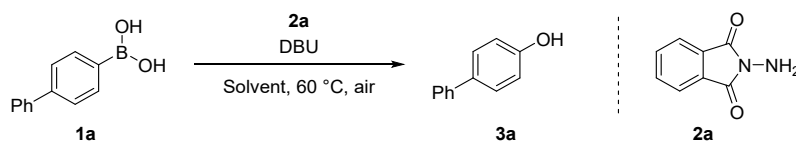

Under air atmosphere, dry solvent (2.0 mL) was added to an oven-dried reaction tube charged with arylboronic acid **1a** (1.0 equiv, 0.2 mmol), *N*-aminophthalimide **2a** (1.2 equiv, 0.24 mmol), DBU (1.2 equiv, 0.24 mmol) and a stirring bar; then the reaction mixture was stirred at 60 °C heated by oil bath. Upon the completion of the reaction, the mixture was cooled to room temperature and quenched with saturated aqueous NH<sub>4</sub>Cl (4 mL). The mixture was then extracted with diethyl ether (10 mL) for three times. The combined organic phase was continually washed with 10 mL brine, dried over MgSO<sub>4</sub>, filtered, and concentrated under reduced pressure. The resulting residue was purified by flash column chromatography to give the desired product **3a**.

**Table S2.** Solvent Optimization.

| Entry    | Solvent                         | Time (h)  | Yield of <b>3a</b> (%) |
|----------|---------------------------------|-----------|------------------------|
| <b>1</b> | <b>CH<sub>3</sub>CN</b>         | <b>22</b> | <b>67</b>              |
| 2        | DMF                             | 24        | 59                     |
| 3        | DMA                             | 24        | 44                     |
| 4        | EtOAc                           | 24        | 47                     |
| 5        | CH <sub>3</sub> NO <sub>2</sub> | 24        | 30                     |
| 6        | ClCH <sub>2</sub> CN            | 24        | 0                      |
| 7        | toluene                         | 24        | 32                     |
| 8        | PhF                             | 23        | 29                     |
| 9        | PhCl                            | 33        | 33                     |
| 10       | DCE                             | 24        | 21                     |
| 11       | CH <sub>3</sub> OH              | 24        | 0                      |
| 12       | HFIP                            | 24        | 0                      |
| 13       | DME                             | 27        | 33                     |
| 14       | THF                             | 24        | 48                     |
| 15       | 1,4-dioxane                     | 36        | 52                     |

### 3. Temperature Optimization

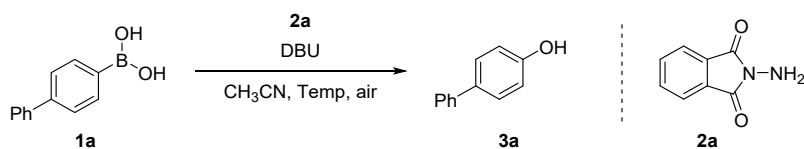

Under air atmosphere, dry CH<sub>3</sub>CN (2.0 mL) was added to an oven-dried reaction tube charged with arylboronic acid **1a** (1.0 equiv, 0.2 mmol), *N*-aminophthalimide **2a** (1.2 equiv, 0.24 mmol), DBU (1.2 equiv, 0.24 mmol) and a stirring bar; then the reaction mixture was stirred at different temperature heated by oil bath. Upon the completion of the reaction, the mixture was cooled to room temperature and quenched with saturated aqueous NH<sub>4</sub>Cl (4 mL). The mixture was then extracted with diethyl ether (10 mL) for three times. The combined organic phase was continually washed with 10 mL brine, dried over MgSO<sub>4</sub>, filtered, and concentrated under reduced pressure. The resulting residue was purified by flash column chromatography to give the desired product **3a**.

**Table S3.** Temperature Optimization.

| Entry    | Temp (°C) | Time (h)  | Yield of <b>3a</b> (%) |
|----------|-----------|-----------|------------------------|
| 1        | rt        | 24        | trace                  |
| 2        | 40        | 26        | 58                     |
| <b>3</b> | <b>60</b> | <b>22</b> | <b>67</b>              |
| 4        | reflux    | 16        | 51                     |

#### 4. Reactant ratio Optimization

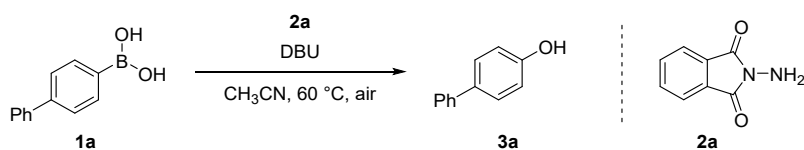

Under air atmosphere, dry CH<sub>3</sub>CN (2.0 mL) was added to an oven-dried reaction tube charged with arylboronic acid **1a** (1.0 equiv, 0.2 mmol), *N*-aminophthalimide **2a** (x equiv), DBU (y equiv) and a stirring bar; then the reaction mixture was stirred at 60 °C heated by oil bath. Upon the completion of the reaction, the mixture was cooled to room temperature and quenched with saturated aqueous NH<sub>4</sub>Cl (4 mL). The mixture was then extracted with diethyl ether (10 mL) for three times. The combined organic phase was

continually washed with 10 mL brine, dried over MgSO<sub>4</sub>, filtered, and concentrated under reduced pressure. The resulting residue was purified by flash column chromatography to give the desired product **3a**.

**Table S4.** Reactant ratio Optimization.

| Entry    | 1a:2a:base     | Time (h)  | Yield of <b>3a</b> (%) |
|----------|----------------|-----------|------------------------|
| 1        | 1:1.2:1.2      | 22        | 67                     |
| 2        | 1:1.5:1.5      | 18        | 77                     |
| <b>3</b> | <b>1:1.5:2</b> | <b>12</b> | <b>90</b>              |
| 4        | 1:2:2          | 18        | 85                     |

### 5. Mediator Optimization

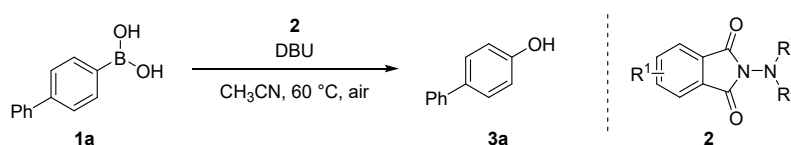

Under air atmosphere, dry CH<sub>3</sub>CN (2.0 mL) was added to an oven-dried reaction tube charged with arylboronic acid **1a** (1.0 equiv, 0.2 mmol), *N*-aminophthalimide **2** (1.5 equiv, 0.3 mmol), DBU (2 equiv, 0.4 mmol) and a stirring bar; then the reaction mixture was stirred at 60 °C heated by oil bath. Upon the completion of the reaction, the mixture was cooled to room temperature and quenched with saturated aqueous NH<sub>4</sub>Cl (4 mL). The mixture was then extracted with diethyl ether (10 mL) for three times. The combined organic phase was continually washed with 10 mL brine, dried over MgSO<sub>4</sub>, filtered, and concentrated under reduced pressure. The resulting residue was purified by flash column chromatography to give the desired product **3a**.

**Table S5.** Mediator Optimization.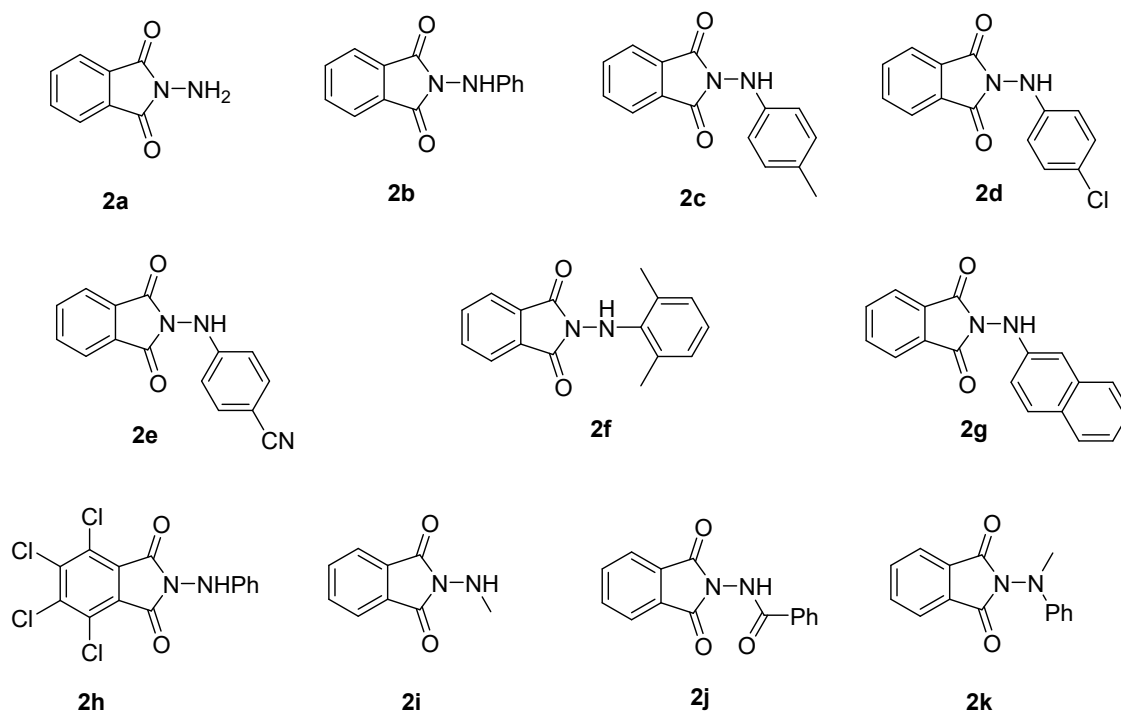

| Entry    | <b>2</b>  | Time (h) | Yield of <b>3a</b> (%) |
|----------|-----------|----------|------------------------|
| 1        | <b>2a</b> | 12       | 90                     |
| 2        | <b>2b</b> | 9        | 95                     |
| 3        | <b>2c</b> | 3        | 95                     |
| 4        | <b>2d</b> | 10       | 91                     |
| 5        | <b>2e</b> | 12       | 80                     |
| <b>6</b> | <b>2f</b> | <b>3</b> | <b>98</b>              |
| 7        | <b>2g</b> | 12       | 95                     |
| 8        | <b>2h</b> | 36       | 72                     |
| 9        | <b>2i</b> | 9        | 75                     |
| 10       | <b>2j</b> | 48       | 8                      |
| 11       | <b>2k</b> | 24       | 0                      |





## (C) Computational details

All data in this study were calculated with the Gaussian 16 software package (ref. 22 in the main body, similarly hereinafter). The structures were optimized at the B3LYP-GD3(BJ)/6-31G+(d,p) level (ref 23) in conjunction with the SMD solvation model (ref 24) in acetonitrile. Vibrational frequency analysis was computed at the same level to ensure that the minimum points have no imaginary frequency and the transition states have only one imaginary frequency. Accurate single-point energies were obtained at M06-2X-GD3/def2-tzvpd level (ref 25) in conjunction with the SMD solvation model in acetonitrile.

**Ref 22:** M. J. Frisch, G. W. Trucks, H. B. Schlegel, G. E. Scuseria, M. A. Robb, J. R. Cheeseman, G. Scalmani, V. Barone, G. A. Petersson, H. Nakatsuji, X. Li, M. Caricato, A. V. Marenich, J. Bloino, B. G. Janesko, R. Gomperts, B. Mennucci, H. P. Hratchian, J. V. Ortiz, A. F. Izmaylov, J. L. Sonnenberg, D. Williams-Young, F. Ding, F. Lipparini, F. Egidi, J. Goings, B. Peng, A. Petrone, T. Henderson, D. Ranasinghe, V. G. Zakrzewski, J. Gao, N. Rega, G. Zheng, W. Liang, M. Hada, M. Ehara, K. Toyota, R. Fukuda, J. Hasegawa, M. Ishida, T. Nakajima, Y. Honda, O. Kitao, H. Nakai, T. Vreven, K. Throssell, J. A. Montgomery, Jr., J. E. Peralta, F. Ogliaro, M. J. Bearpark, J. J. Heyd, E. N. Brothers, K. N. Kudin, V. N. Staroverov, T. A. Keith, R. Kobayashi, J. Normand, K. Raghavachari, A. P. Rendell, J. C. Burant, S. S. Iyengar, J. Tomasi, M. Cossi, J. M. Millam, M. Klene, C. Adamo, R. Cammi, J. W. Ochterski, R. L. Martin, K. Morokuma, O. Farkas, J. B. Foresman, and D. J. Fox, Gaussian, Inc., Wallingford CT, 2016.

|            | E (hartree)   | $\Delta E$ (hartree) | $\Delta E$ (kcal/mol) |
|------------|---------------|----------------------|-----------------------|
| <b>9'</b>  | -1126.5842199 | 0.0000000            | 0                     |
| <b>TS1</b> | -1126.5391734 | 0.0450465            | 28.2                  |
| <b>FLP</b> | -1126.659358  | -0.0751381           | -47.1                 |
| <b>14'</b> | -1126.7177743 | -0.1335544           | -83.8                 |

|            | Thermal correction<br>to Gibbs Free<br>Energy | G (hartree)   | $\Delta G$ (hartree) | $\Delta G$ (kcal/mol) |
|------------|-----------------------------------------------|---------------|----------------------|-----------------------|
| <b>9'</b>  | 0.203489                                      | -1126.3807309 | 0                    | 0                     |
| <b>TS1</b> | 0.199755                                      | -1126.3394184 | 0.0413125            | 25.9                  |
| <b>14'</b> | 0.204545                                      | -1126.5132293 | -0.1324984           | -83.1                 |

**XYZ Coordinates for optimized structures: 9'**

Number of imaginary frequencies: 0

---

| Center<br>Number | Atomic<br>Number | Atomic<br>Type | Coordinates (Angstroms) |           |           |
|------------------|------------------|----------------|-------------------------|-----------|-----------|
|                  |                  |                | X                       | Y         | Z         |
| 1                | 6                | 0              | 3.504824                | 2.304802  | -1.371033 |
| 2                | 6                | 0              | 2.867767                | 3.028556  | -0.354751 |
| 3                | 6                | 0              | 2.131683                | 2.375673  | 0.645591  |
| 4                | 6                | 0              | 2.054663                | 0.991683  | 0.580965  |
| 5                | 6                | 0              | 2.687993                | 0.267955  | -0.437284 |
| 6                | 6                | 0              | 3.425954                | 0.904328  | -1.423813 |
| 7                | 6                | 0              | 1.349523                | 0.031029  | 1.467866  |
| 8                | 7                | 0              | 1.608764                | -1.238514 | 0.920675  |
| 9                | 6                | 0              | 2.415267                | -1.182654 | -0.231042 |
| 10               | 8                | 0              | 2.813654                | -2.140164 | -0.865283 |
| 11               | 8                | 0              | 0.722199                | 0.229981  | 2.493310  |
| 12               | 7                | 0              | 1.003023                | -2.415016 | 1.354798  |
| 13               | 8                | 0              | -0.098857               | -2.744261 | 0.560615  |
| 14               | 8                | 0              | -1.122536               | -1.672500 | 0.656928  |
| 15               | 5                | 0              | -1.442436               | -1.121351 | -0.732177 |
| 16               | 8                | 0              | -0.278009               | -0.549677 | -1.417239 |
| 17               | 8                | 0              | -1.957027               | -2.182687 | -1.601525 |
| 18               | 6                | 0              | -2.545241               | 0.035391  | -0.338739 |
| 19               | 6                | 0              | -3.858158               | 0.005918  | -0.842057 |
| 20               | 6                | 0              | -4.789108               | 1.012966  | -0.555373 |
| 21               | 6                | 0              | -4.425745               | 2.091016  | 0.258179  |
| 22               | 6                | 0              | -3.127207               | 2.146393  | 0.778660  |
| 23               | 6                | 0              | -2.210840               | 1.131302  | 0.483361  |
| 24               | 1                | 0              | 4.067857                | 2.836813  | -2.131441 |
| 25               | 1                | 0              | 2.944354                | 4.111186  | -0.342235 |
| 26               | 1                | 0              | 1.636835                | 2.931942  | 1.434836  |
| 27               | 1                | 0              | 3.918075                | 0.343164  | -2.211311 |
| 28               | 1                | 0              | 0.655787                | -2.212681 | 2.297492  |
| 29               | 1                | 0              | -0.164564               | 0.375199  | -1.171291 |
| 30               | 1                | 0              | -2.515112               | -2.775310 | -1.084696 |
| 31               | 1                | 0              | -4.154061               | -0.822392 | -1.482200 |
| 32               | 1                | 0              | -5.794938               | 0.957740  | -0.965742 |
| 33               | 1                | 0              | -5.142632               | 2.876036  | 0.484359  |
| 34               | 1                | 0              | -2.832780               | 2.976963  | 1.416304  |
| 35               | 1                | 0              | -1.212792               | 1.191106  | 0.910860  |

---

TS1

Number of imaginary frequencies: 1

| Center<br>Number | Atomic<br>Number | Atomic<br>Type | Coordinates (Angstroms) |           |           |
|------------------|------------------|----------------|-------------------------|-----------|-----------|
|                  |                  |                | X                       | Y         | Z         |
| 1                | 6                | 0              | 5.140888                | -1.201013 | 1.021998  |
| 2                | 6                | 0              | 4.431304                | -2.329505 | 0.593226  |
| 3                | 6                | 0              | 3.214517                | -2.201806 | -0.095668 |
| 4                | 6                | 0              | 2.746758                | -0.917439 | -0.329512 |
| 5                | 6                | 0              | 3.454925                | 0.211285  | 0.100037  |
| 6                | 6                | 0              | 4.658838                | 0.095301  | 0.777928  |
| 7                | 6                | 0              | 1.508260                | -0.453472 | -1.009555 |
| 8                | 7                | 0              | 1.533314                | 0.941928  | -0.940294 |
| 9                | 6                | 0              | 2.698679                | 1.426393  | -0.319685 |
| 10               | 8                | 0              | 2.996874                | 2.598742  | -0.181801 |
| 11               | 8                | 0              | 0.632503                | -1.111876 | -1.556918 |
| 12               | 7                | 0              | 0.572976                | 1.806880  | -1.519383 |
| 13               | 8                | 0              | -0.288736               | 2.332621  | -0.595442 |
| 14               | 8                | 0              | -1.730211               | 1.114129  | -0.218636 |
| 15               | 5                | 0              | -1.574243               | 0.426168  | 0.997038  |
| 16               | 8                | 0              | -0.670066               | -0.666295 | 1.138115  |
| 17               | 8                | 0              | -1.697539               | 1.111576  | 2.242863  |
| 18               | 6                | 0              | -3.181277               | -0.092199 | 0.276155  |
| 19               | 6                | 0              | -3.269480               | -1.242725 | -0.518349 |
| 20               | 6                | 0              | -4.513696               | -1.812269 | -0.806110 |
| 21               | 6                | 0              | -5.686470               | -1.215811 | -0.326628 |
| 22               | 6                | 0              | -5.605781               | -0.044633 | 0.436313  |
| 23               | 6                | 0              | -4.359295               | 0.522641  | 0.720921  |
| 24               | 1                | 0              | 6.079659                | -1.331043 | 1.551176  |
| 25               | 1                | 0              | 4.828615                | -3.318865 | 0.797021  |
| 26               | 1                | 0              | 2.662561                | -3.074494 | -0.428915 |
| 27               | 1                | 0              | 5.208328                | 0.970621  | 1.108446  |
| 28               | 1                | 0              | 0.047569                | 1.210267  | -2.166661 |
| 29               | 1                | 0              | -0.518048               | -1.074035 | 0.276335  |
| 30               | 1                | 0              | -2.139706               | 1.957422  | 2.102438  |
| 31               | 1                | 0              | -2.368028               | -1.707116 | -0.909689 |
| 32               | 1                | 0              | -4.568891               | -2.715600 | -1.408379 |
| 33               | 1                | 0              | -6.654129               | -1.654305 | -0.553508 |
| 34               | 1                | 0              | -6.512390               | 0.428714  | 0.804893  |
| 35               | 1                | 0              | -4.309956               | 1.436276  | 1.307515  |

**FLP of 10 and 11'**

| Center<br>Number | Atomic<br>Number | Atomic<br>Type | Coordinates (Angstroms) |           |           |
|------------------|------------------|----------------|-------------------------|-----------|-----------|
|                  |                  |                | X                       | Y         | Z         |
| 1                | 6                | 0              | -5.146653               | 1.224513  | 1.052961  |
| 2                | 6                | 0              | -4.414708               | 2.358995  | 0.683384  |
| 3                | 6                | 0              | -3.199587               | 2.242815  | -0.012670 |
| 4                | 6                | 0              | -2.759604               | 0.963561  | -0.315881 |
| 5                | 6                | 0              | -3.493692               | -0.170368 | 0.049012  |
| 6                | 6                | 0              | -4.692797               | -0.066933 | 0.735555  |
| 7                | 6                | 0              | -1.527536               | 0.497235  | -1.009824 |
| 8                | 7                | 0              | -1.613832               | -0.886301 | -1.080024 |
| 9                | 6                | 0              | -2.769273               | -1.375599 | -0.456448 |
| 10               | 8                | 0              | -3.105251               | -2.544078 | -0.374328 |
| 11               | 8                | 0              | -0.590420               | 1.166595  | -1.444011 |
| 12               | 7                | 0              | -0.563460               | -1.763995 | -1.542671 |
| 13               | 8                | 0              | 0.054218                | -2.357937 | -0.435889 |
| 14               | 8                | 0              | 2.163168                | -0.756223 | -0.047060 |
| 15               | 5                | 0              | 1.282969                | -0.639643 | 1.039277  |
| 16               | 8                | 0              | 0.483437                | 0.471880  | 1.171672  |
| 17               | 8                | 0              | 1.433452                | -1.397518 | 2.177618  |
| 18               | 6                | 0              | 3.357201                | -0.059272 | -0.041533 |
| 19               | 6                | 0              | 3.429829                | 1.197222  | -0.649410 |
| 20               | 6                | 0              | 4.651836                | 1.872391  | -0.681213 |
| 21               | 6                | 0              | 5.792681                | 1.298041  | -0.110815 |
| 22               | 6                | 0              | 5.708614                | 0.038233  | 0.491710  |
| 23               | 6                | 0              | 4.492062                | -0.644993 | 0.528842  |
| 24               | 1                | 0              | -6.080177               | 1.346099  | 1.593737  |
| 25               | 1                | 0              | -4.789101               | 3.344273  | 0.943675  |
| 26               | 1                | 0              | -2.628648               | 3.120810  | -0.296857 |
| 27               | 1                | 0              | -5.263017               | -0.946510 | 1.016421  |
| 28               | 1                | 0              | 0.100363                | -1.077591 | -1.929888 |
| 29               | 1                | 0              | 0.434437                | 0.965540  | 0.339885  |
| 30               | 1                | 0              | 1.967658                | -2.182247 | 2.004670  |
| 31               | 1                | 0              | 2.540028                | 1.627735  | -1.097356 |
| 32               | 1                | 0              | 4.714574                | 2.848040  | -1.155469 |
| 33               | 1                | 0              | 6.740505                | 1.827228  | -0.138981 |
| 34               | 1                | 0              | 6.593950                | -0.413226 | 0.931191  |
| 35               | 1                | 0              | 4.416548                | -1.626663 | 0.985425  |

14'

Number of imaginary frequencies: 0

| Center<br>Number | Atomic<br>Number | Atomic<br>Type | Coordinates (Angstroms) |           |           |
|------------------|------------------|----------------|-------------------------|-----------|-----------|
|                  |                  |                | X                       | Y         | Z         |
| 1                | 6                | 0              | 5.693422                | -0.972878 | 0.327300  |
| 2                | 6                | 0              | 4.961878                | -2.137488 | 0.592554  |
| 3                | 6                | 0              | 3.566667                | -2.166677 | 0.443160  |
| 4                | 6                | 0              | 2.946154                | -0.998194 | 0.025446  |
| 5                | 6                | 0              | 3.677137                | 0.166448  | -0.240347 |
| 6                | 6                | 0              | 5.056033                | 0.203863  | -0.096693 |
| 7                | 6                | 0              | 1.509239                | -0.706454 | -0.210172 |
| 8                | 7                | 0              | 1.450351                | 0.634163  | -0.615236 |
| 9                | 6                | 0              | 2.727203                | 1.228744  | -0.674046 |
| 10               | 8                | 0              | 2.958878                | 2.373038  | -1.015328 |
| 11               | 8                | 0              | 0.540503                | -1.446662 | -0.105797 |
| 12               | 7                | 0              | 0.297811                | 1.337693  | -0.992115 |
| 13               | 8                | 0              | -0.278245               | 1.995124  | 0.139113  |
| 14               | 8                | 0              | -2.230810               | 0.774940  | -0.374044 |
| 15               | 5                | 0              | -1.430283               | 1.285082  | 0.819545  |
| 16               | 8                | 0              | -1.051305               | 0.204811  | 1.699426  |
| 17               | 8                | 0              | -2.118991               | 2.286906  | 1.598429  |
| 18               | 6                | 0              | -3.324860               | 0.001597  | -0.295131 |
| 19               | 6                | 0              | -3.820559               | -0.555614 | -1.491932 |
| 20               | 6                | 0              | -4.964664               | -1.354313 | -1.488355 |
| 21               | 6                | 0              | -5.644764               | -1.619978 | -0.293150 |
| 22               | 6                | 0              | -5.156796               | -1.068011 | 0.896879  |
| 23               | 6                | 0              | -4.012923               | -0.265198 | 0.906800  |
| 24               | 1                | 0              | 6.771566                | -0.980893 | 0.452357  |
| 25               | 1                | 0              | 5.483058                | -3.031619 | 0.919661  |
| 26               | 1                | 0              | 2.997593                | -3.067149 | 0.649172  |
| 27               | 1                | 0              | 5.621747                | 1.106521  | -0.302784 |
| 28               | 1                | 0              | -0.385498               | 0.630348  | -1.283148 |
| 29               | 1                | 0              | -0.692502               | -0.528768 | 1.182071  |
| 30               | 1                | 0              | -2.257391               | 3.072042  | 1.055146  |
| 31               | 1                | 0              | -3.290331               | -0.349002 | -2.417718 |
| 32               | 1                | 0              | -5.325599               | -1.772141 | -2.424856 |
| 33               | 1                | 0              | -6.534645               | -2.242476 | -0.290080 |
| 34               | 1                | 0              | -5.672515               | -1.262153 | 1.834332  |
| 35               | 1                | 0              | -3.640447               | 0.156542  | 1.831310  |

## (D) Procedures for starting materials

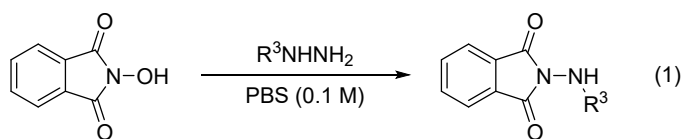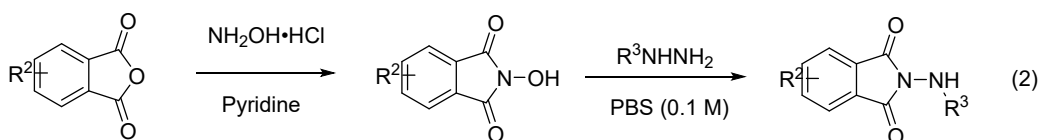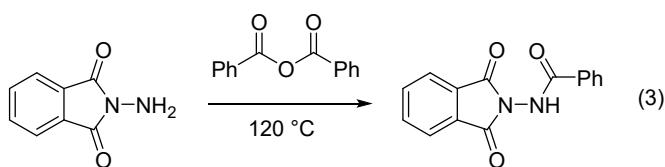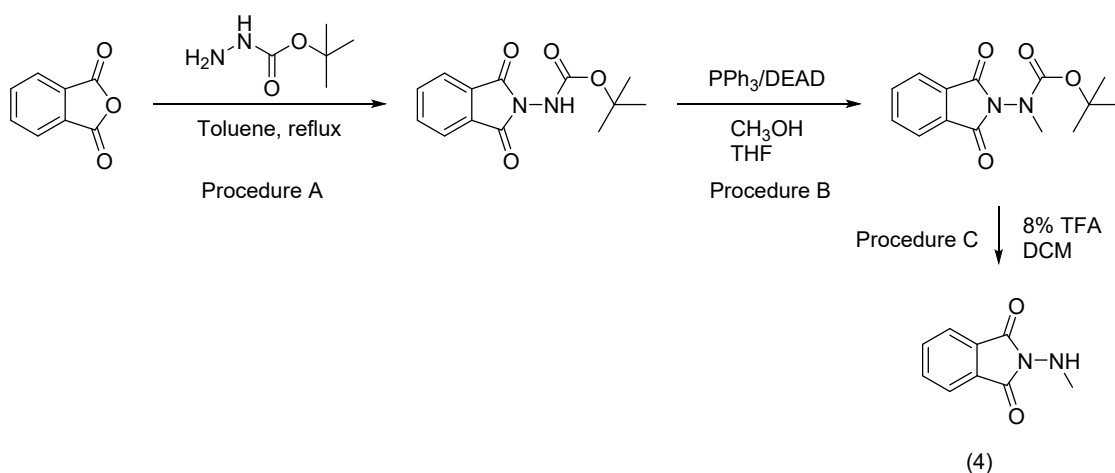

**Route 1:** To a solution of *N*-hydroxyphthalimide (489 mg, 3.0 mmol, 1.0 equiv) in pH 7.0 phosphate buffer (30 mL) was added phenylhydrazine (0.293 mL, 3.0 mmol, 1.0 equiv) at room temperature. The mixture was stirred for 15 h at room temperature and then filtered and washed with water. The solid was filtered and dissolved with ethyl acetate (150 mL), and then the solution was washed with 5% aq. HCl (30 mL for twice) and the organic phase was dried with brine and MgSO<sub>4</sub>, filtered and concentrated in

vacuo and purified by silica gel column chromatography (PE:EtOAc = 2:1) to give product as a bright yellow solid.<sup>[1]</sup>

**Route 2:** To a solution of anhydride (1.0 equiv, 3.5 mmol) and hydroxylamine hydrochloride (2.0 equiv, 7.0 mmol) in pyridine (10 mL) was heated at 80 °C for 4 h and then cooled to room temperature. The mixture was diluted by adding 20 mL water and acidified to pH 2 with concentrated HCl. The precipitate was filtrated and washed with water. The filtrate was dried in vacuo and purified by recrystallization with EtOH. The next step is the same as route 1 to get the product.<sup>[2]</sup>

**Route 3:** *N*-Aminophthalimide (165 mg, 1 mmol) was mixed with benzoic anhydride (1130 mg, 5 mmol) in a round bottom flask and warmed to 120 °C, forming a homogeneous yellow solution which turned colorless as heating was continued for 1 h. Afterwards, the reaction mixture was cooled to room temperature, forming colorless prismatic needles. The excess anhydride was drawn off and the residue was washed with a small amount of cold ether to get the product.<sup>[3]</sup>

**Route 4: Produce A:** To a suspension *tert*-butylcarbazate (1 equiv) in toluene, phthalic anhydride (1 equiv) was added. The suspension was refluxed in a two-neck round bottom flask fitted with a Dean-Stark trap for 4 h. The mixture was cooled to room temperature and concentrated. The crude product was purified by column chromatography using hexanes and ethyl acetate as the eluting solvent.<sup>[4]</sup>

**Produce B:** To a solution of *N-tert*butyloxycarbonylaminophthalimide (1 equiv), PPh<sub>3</sub> (1.5 equiv) and methanol (3 equiv) in anhydrous THF and under N<sub>2</sub> atmosphere was added one portion of Diethyl azodicarboxylate (DEAD) (1.5 equiv) under stirring at 0-5 °C. The resulting solution was stirred overnight and concentrated under vacuum. The crude was purified by column chromatography on silica gel using hexanes and ethyl acetate.<sup>[4]</sup>

**Produce C:** To a solution of *N*-alkyl-*N-tert*butyloxycarbonylaminophthalimide (1 equiv) in anhydrous CH<sub>2</sub>Cl<sub>2</sub> was added trifluoroacetic acid (8% TFA in CH<sub>2</sub>Cl<sub>2</sub>) (25 equiv) dropwise at 0 °C. The mixture was brought to room temperature and stirred

overnight. After completion, the solution was concentrated under vacuum. The crude was dissolved in ethyl acetate and the organic layer was sequentially washed with water ( $2 \times 10$  mL), saturated  $\text{NaHCO}_3$  ( $2 \times 10$  mL) and finally with brine ( $2 \times 10$  mL). The organic layer was dried over  $\text{Na}_2\text{SO}_4$ , filtered and the solvent was removed under reduced pressure to yield crude product. After concentrating the organic layer, the desired compound was purified by column chromatography on silica gel using hexanes and ethyl acetate mixture.<sup>[4]</sup>

The spectra data of **2b**, **2c**, **2d**, **2g**, **2h**, **2i**, **2j**, **2k**, were consistent with literature reported.<sup>[1]</sup>

The spectral data of compounds **2e**, **2f**, **2l** were shown below.

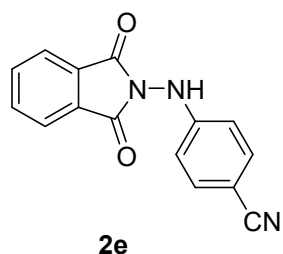

4-((1,3-dioxoisoindolin-2-yl)amino)benzonitrile (**2e**): 73% yield, yellow solid. m.p. 267.0-267.8 °C.  $^1\text{H}$  NMR (400 MHz,  $\text{DMSO}-d_6$ )  $\delta$  9.32 (s, 1H), 8.12 – 7.86 (m, 4H), 7.61 (d,  $J = 8.7$  Hz, 2H), 6.95 (d,  $J = 8.8$  Hz, 2H).  $^{13}\text{C}$  NMR (101 MHz,  $\text{DMSO}$ )  $\delta$  166.59, 151.27, 135.54, 134.15, 130.17, 124.13, 120.13, 112.79, 101.34. HRMS (ESI)  $m/z$  calcd for  $\text{C}_{15}\text{H}_{10}\text{N}_3\text{O}_2^+$   $[\text{M} + \text{H}]^+$  264.0768, found 267.0774.

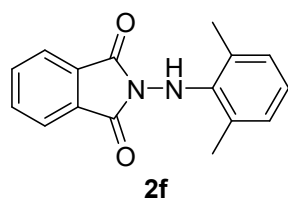

2-((2,6-dimethylphenyl)amino)isoindoline-1,3-dione (**2f**): 63% yield, yellow solid. m.p. 175.3-175.8 °C.  $^1\text{H}$  NMR (400 MHz,  $\text{DMSO}-d_6$ )  $\delta$  7.91 (s, 4H), 6.96 (d,  $J = 7.5$  Hz, 2H), 6.81 (t,  $J = 7.4$  Hz, 1H), 2.23 (s, 6H).  $^{13}\text{C}$  NMR (101 MHz,  $\text{DMSO}$ )  $\delta$  167.52, 142.90, 135.60, 129.68, 129.41, 127.72, 123.84, 122.68, 18.80. HRMS (ESI)  $m/z$  calcd for  $\text{C}_{15}\text{H}_{12}\text{N}_2\text{O}_2^+$   $[\text{M} + \text{H}]^+$  267.1128, found 267.1132.



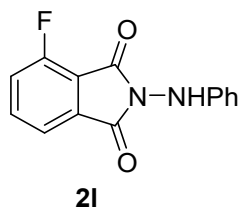

4-fluoro-2-(phenylamino)isoindoline-1,3-dione (**21**): 70% yield, yellow solid. m.p 190.1-190.3 °C. <sup>1</sup>H NMR (400 MHz, Chloroform-*d*) δ 7.88 – 7.80 (m, 1H), 7.78 (d, *J* = 7.2 Hz, 1H), 7.49 (t, *J* = 8.4 Hz, 1H), 7.36 – 7.20 (m, 2H), 7.04 – 6.95 (m, 1H), 6.92 – 6.81 (m, 2H), 6.30 (s, 1H). <sup>13</sup>C NMR (101 MHz, Chloroform-*d*) δ 165.33 (d, *J* = 2.9 Hz), 163.18, 157.71 (d, *J* = 267.1 Hz), 145.51, 137.36 (d, *J* = 7.8 Hz), 131.95, 129.40, 123.19 (d, *J* = 19.6 Hz), 122.54, 120.21 (d, *J* = 3.6 Hz), 115.93 (d, *J* = 12.7 Hz), 114.29. HRMS (ESI) *m/z* calcd for C<sub>14</sub>H<sub>10</sub>FN<sub>2</sub>O<sub>2</sub><sup>+</sup> [M + H]<sup>+</sup> 257.0721, found 257.0727.

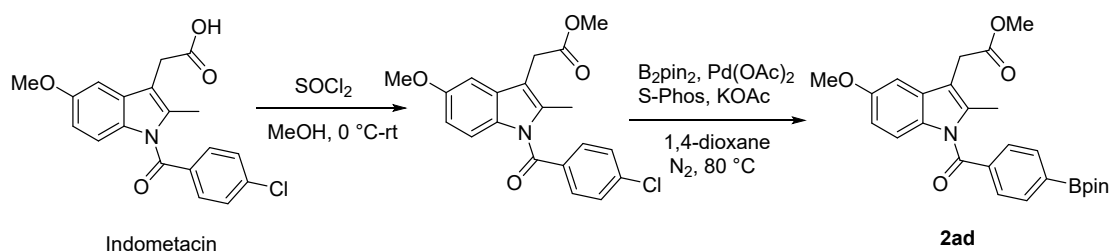

Methyl 2-(1-(4-chlorobenzene)-5-methoxy-2-methyl-1H-indol-3-yl)acetate (**2ad**): SOCl<sub>2</sub> (7.7 mmol, 1.5 mL) was dropwise added to a solution of Indometacin (4 mmol, 1.43 g) and MeOH (10 mL) at 0 °C. Subsequently, the temperature is from 0 °C to rt. After the reaction, the reaction mixture was concentrated under reduced pressure to give ester as a white solid. Then, A mixture of ester (1 mmol, 372 mg), bis(pinacolato)diboron (B<sub>2</sub>pin<sub>2</sub>, 3 mmol, 762 mg), Pd(OAc)<sub>2</sub> (4 mol%, 9 mg), 2-dicyclohexylphosphino-2',6'-dimethoxybiphenyl (S-Phos, 10 mol%, 41 mg), KOAc (3 mol, 295 mg) was stirred in 1, 4-dioxane (4 mL) under N<sub>2</sub> atmosphere at 80 °C. After the reaction, the reaction mixture was diluted with H<sub>2</sub>O and extracted with ethyl acetate (×3). The combined organics were washed with brine, dried over Na<sub>2</sub>SO<sub>4</sub>, and concentrated under reduced pressure. The resulting crude mixture was chromatographed on silica gel using petroleum ether/ethyl acetate (PE/EA = 10/1) as eluent to give **2ad**.<sup>[5]</sup>

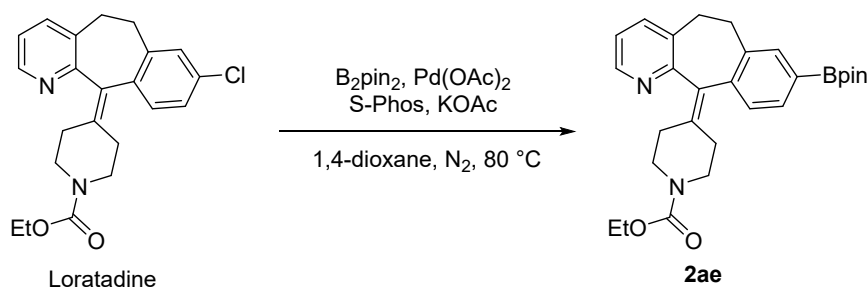

Ethyl 4-(8-(4,4,5,5-tetramethyl-1,3,2-dioxaborolan-2-yl)-5,6-dihydro-1Hbenzo[5,6]cyclohepta[1,2-b]pyridin-11-ylidene)piperidine-1-carboxylate (**2ae**): A mixture of Loratadine (1 mmol, 383 mg), bis(pinacolato)diboron ( $B_2pin_2$ , 3 mmol, 762 mg),  $Pd(OAc)_2$  (4 mol%, 9 mg), 2-dicyclohexylphosphino-2',6'-dimethoxybiphenyl (S-Phos, 10 mol%, 41 mg), KOAc (3 mol, 295 mg) was stirred in 1,4-dioxane (4 mL) under  $N_2$  atmosphere at 80 °C. After the reaction, the reaction mixture was diluted with  $H_2O$  and extracted with ethyl acetate ( $\times 3$ ). The combined organics were washed with brine, dried over  $Na_2SO_4$ , and concentrated under reduced pressure. The resulting crude mixture was chromatographed on silica gel using petroleum ether/ethyl acetate (PE/EA = 1/1) as eluent to give **2ae**. [5]

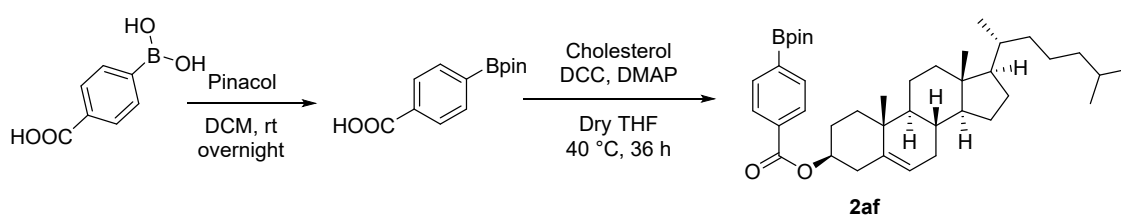

(3S,8S,9S,10R,13R,14S,17R)-10,13-dimethyl-17-((R)-6-methylheptan-2-yl)-2,3,4,7,8,9,10,11,12,13,14,15,16,17-tetradecahydro-1H-cyclopenta[a]phenanthren-3-yl 4-(4,4,5,5-tetramethyl-1,3,2-dioxaborolan-2-yl)benzoate (**2af**): 4-boronobenzoic acid (3 mmol), pinacol (3.3 mmol) were dispersed in 40 mL DCM. The reaction mixture was stirred at room temperature for overnight. Then, the reaction solution was filtered to remove all solid impurities. The solid was rinsed by DCM 3 times. The combined solution was concentrated to get the product.

Under nitrogen, a 20-mL vial was charged with Acid (3.0 mmol), Cholesterol (3.6 mmol), DCC (4.5 mmol), DMAP (0.60 mmol) and dry THF (10 mL). The vial was sealed with a Teflon-lined cap and stirred at 40 °C for 1.5 d. The reaction was quenched with water (20 mL) and extracted with ethyl acetate (20 mL  $\times 3$ ). The organic layer was condensed, and the residue was purified by flash column chromatography (hexane/ethyl acetate = 40/1) to afford the **2af** as white solid. [6]

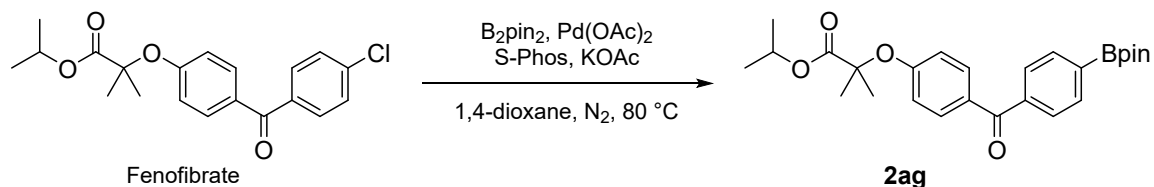

Isopropyl 2-methyl-2-(4-(4-(4,4,5,5-tetramethyl-1,3,2-dioxaborolan-2-yl) benzoyl) phenoxy) propanoate (**2ag**): A mixture of Fenofibrate (1 mmol, 361 mg),

bis(pinacolato)diboron ( $B_2pin_2$ , 3 mmol, 762 mg),  $Pd(OAc)_2$  (4 mol%, 9 mg), 2-dicyclohexylphosphino-2',6'-dimethoxybiphenyl (S-Phos, 10 mol%, 41 mg), KOAc (3 mol, 295 mg) was stirred in 1,4-dioxane (4 mL) under  $N_2$  atmosphere at 80 °C. After the reaction, the reaction mixture was diluted with  $H_2O$  and extracted with ethyl acetate ( $\times 3$ ). The combined organics were washed with brine, dried over  $Na_2SO_4$ , and concentrated under reduced pressure. The resulting crude mixture was chromatographed on silica gel using petroleum ether/ethyl acetate (PE/EA = 10/1) as eluent to give **2ag**.<sup>[5]</sup>

The spectral data of compounds **2ad**, **2ae**, **2af**, **2ag** were shown below.

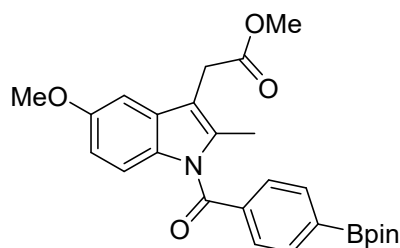

methyl 2-(5-methoxy-1-(4-(4,4,5,5-tetramethyl-1,3,2-dioxaborolan-2-yl)benzoyl)-1H-indol-3-yl)acetate (**2ad**): 70% yield;  $^1H$  NMR (400 MHz, Chloroform-*d*)  $\delta$  7.91 (d,  $J = 7.9$  Hz, 2H), 7.68 (d,  $J = 7.7$  Hz, 2H), 6.95 (d,  $J = 2.5$  Hz, 1H), 6.88 (d,  $J = 9.0$  Hz, 1H), 6.64 (dd,  $J = 9.1, 2.5$  Hz, 1H), 3.82 (s, 3H), 3.69 (s, 3H), 3.66 (s, 2H), 2.36 (s, 3H), 1.37 (s, 12H).  $^{13}C$  NMR (101 MHz,  $CDCl_3$ )  $\delta$  171.44, 169.54, 156.05, 137.96, 136.10, 135.00, 130.97, 130.65, 128.67, 115.24, 112.41, 111.60, 101.25, 84.38, 55.75, 52.18, 30.22, 24.94, 13.47.

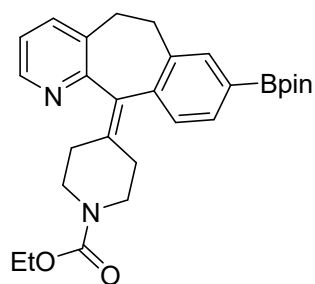

ethyl 4-(8-(4,4,5,5-tetramethyl-1,3,2-dioxaborolan-2-yl)-5,6-dihydro-1H-benzo[5,6]cyclohepta[1,2-b]pyridin-11-ylidene)piperidine-1-carboxylate (**2ae**): 53% yield;  $^1H$  NMR (400 MHz, Chloroform-*d*)  $\delta$  8.37 (d,  $J = 4.6$  Hz, 1H), 7.64 – 7.57 (m, 2H), 7.40 (d,  $J = 7.6$  Hz, 1H), 7.20 (d,  $J = 7.5$  Hz, 1H), 7.05 (dd,  $J = 7.7, 4.7$  Hz, 1H), 4.12 (q,  $J = 7.2$  Hz, 2H), 3.87 – 3.70 (m, 2H), 3.54 – 3.25 (m, 2H), 3.18 – 3.06 (m, 2H), 2.95 – 2.74 (m, 2H), 2.55 – 2.24 (m, 4H), 1.31 (s, 12H), 1.24 (t,  $J = 6.5$  Hz, 3H).  $^{13}C$  NMR (101 MHz,  $CDCl_3$ )  $\delta$  157.10, 155.57, 146.57, 142.51, 137.60, 137.07, 136.92, 135.41, 133.73, 132.58, 128.69, 122.17, 83.83, 61.33, 44.92, 31.89, 31.61, 30.82, 30.58, 24.91, 24.85, 14.74.

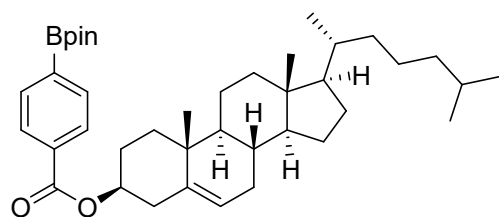

(3*S*,8*S*,9*S*,10*R*,13*R*,14*S*,17*R*)-10,13-dimethyl-17-((*R*)-6-methylheptan-2-yl)-2,3,4,7,8,9,10,11,12,13,14,15,16,17-tetradecahydro-1*H*-cyclopenta[*a*]phenanthren-3-yl 4-(4,4,5,5-tetramethyl-1,3,2-dioxaborolan-2-yl)benzoate (**2af**): 31% yield; <sup>1</sup>H NMR (400 MHz, Chloroform-*d*) δ 8.01 (d, *J* = 8.1 Hz, 2H), 7.86 (d, *J* = 8.1 Hz, 2H), 5.54 – 5.31 (m, 1H), 5.08 – 4.71 (m, 1H), 2.47 (d, *J* = 8.1 Hz, 2H), 2.10 – 1.67 (m, 6H), 1.63 – 1.43 (m, 8H), 1.36 (s, 12H), 1.24 – 0.96 (m, 14H), 0.92 (d, *J* = 6.5 Hz, 3H), 0.87 (dd, *J* = 6.7, 1.8 Hz, 6H), 0.69 (s, 3H). <sup>13</sup>C NMR (101 MHz, CDCl<sub>3</sub>) δ 166.07, 139.73, 134.64, 133.09, 128.61, 122.82, 84.19, 74.74, 56.76, 56.20, 50.11, 42.39, 39.81, 39.58, 38.26, 37.11, 36.72, 36.25, 35.86, 32.00, 31.95, 28.30, 28.08, 27.93, 24.94, 24.36, 23.90, 22.89, 22.63, 21.12, 19.45, 18.79, 11.93.

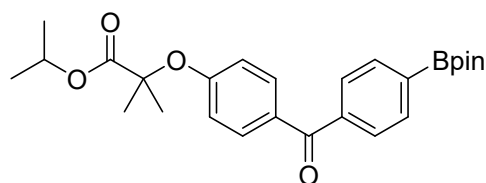

isopropyl 2-methyl-2-(4-(4-(4,4,5,5-tetramethyl-1,3,2-dioxaborolan-2-yl)benzoyl)phenoxy)propanoate: 66% yield (**2ag**); <sup>1</sup>H NMR (400 MHz, Chloroform-*d*) δ 7.89 (d, *J* = 8.1 Hz, 2H), 7.74 (d, *J* = 8.8 Hz, 2H), 7.70 (d, *J* = 8.1 Hz, 2H), 6.84 (d, *J* = 8.8 Hz, 2H), 5.07 (p, *J* = 6.3 Hz, 1H), 1.64 (s, 6H), 1.35 (s, 12H), 1.19 (d, *J* = 6.3 Hz, 6H). <sup>13</sup>C NMR (101 MHz, CDCl<sub>3</sub>) δ 195.69, 173.17, 159.68, 140.43, 134.54, 132.12, 130.58, 128.73, 117.18, 84.19, 79.41, 69.35, 25.43, 24.93, 21.55.

### (E) General procedure for deborohydroxylation of arylboronic acids

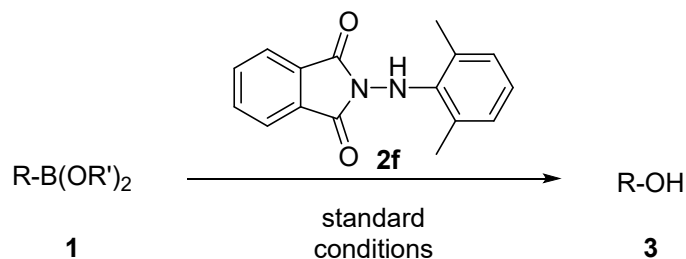

Under air atmosphere, dry CH<sub>3</sub>CN (2.0 mL) was added to an oven-dried reaction tube charged with arylboronic acid **1** (1.0 equiv, 0.2 mmol), **2f** (1.5 equiv, 0.3 mmol), DBU (2.0 equiv, 0.4 mmol) and a stirring bar; then the reaction mixture was stirred at 60 °C heated by oil bath. Upon the completion of the reaction, the mixture was cooled to room temperature and quenched with saturated aqueous NH<sub>4</sub>Cl (4 mL). The mixture was then extracted with diethyl ether (10 mL) for three times. The combined organic phase was continually washed with 10 mL brine, dried over MgSO<sub>4</sub>, filtered, and concentrated under reduced pressure. The resulting residue was purified by flash column chromatography to give the desired product **3**.

### (F) Characterization of products

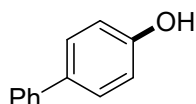

1,1'-biphenyl]-4-ol (**3a**)<sup>10</sup>: 98% yield; <sup>1</sup>H NMR (400 MHz, Chloroform-*d*) δ 7.54 (d, *J* = 7.6 Hz, 2H), 7.48 (d, *J* = 8.0 Hz, 1H), 7.41 (t, *J* = 7.5 Hz, 1H), 7.30 (t, *J* = 7.3 Hz, 1H), 6.91 (d, *J* = 8.2 Hz, 2H), 4.97 (s, 1H). <sup>13</sup>C NMR (101 MHz, CDCl<sub>3</sub>) δ 155.09, 140.79, 134.51, 134.07, 128.79, 128.46, 126.77, 115.69.

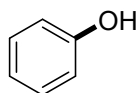

Phenol (**3b**)<sup>10</sup>: 92% yield; <sup>1</sup>H NMR (400 MHz, Chloroform-*d*) δ 7.24 (t, *J* = 7.1 Hz, 2H), 6.93 (t, *J* = 7.5 Hz, 1H), 6.84 (d, *J* = 7.4 Hz, 2H), 5.14 (s, 1H). <sup>13</sup>C NMR (101 MHz, CDCl<sub>3</sub>) δ 155.49, 129.75, 120.88, 115.37.

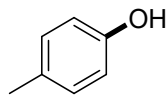

p-cresol (**3c**)<sup>10</sup>: 92% yield; <sup>1</sup>H NMR (400 MHz, Chloroform-*d*) δ 7.09 (d, *J* = 7.9 Hz, 2H), 6.80 (d, *J* = 7.9 Hz, 2H), 5.19 (s, 1H), 2.31 (s, 3H). <sup>13</sup>C NMR (101 MHz, CDCl<sub>3</sub>) δ 153.29, 130.12, 129.99, 115.16, 20.52.

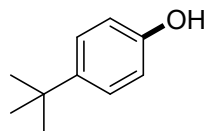

4-(tert-butyl)phenol (**3d**)<sup>10</sup>: 86% yield; <sup>1</sup>H NMR (400 MHz, Chloroform-*d*)  $\delta$  7.31 (d,  $J$  = 8.7 Hz, 2H), 6.83 (d,  $J$  = 8.7 Hz, 2H), 4.93 (s, 1H), 1.34 (s, 9H). <sup>13</sup>C NMR (101 MHz, CDCl<sub>3</sub>)  $\delta$  153.13, 143.62, 126.51, 114.82, 34.14, 31.60.

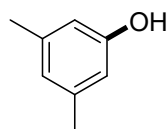

3,5-dimethylphenol (**3e**)<sup>12</sup>: 83% yield; <sup>1</sup>H NMR (400 MHz, Chloroform-*d*)  $\delta$  6.63 (s, 1H), 6.51 (s, 2H), 4.78 (s, 1H), 2.31 (s, 6H). <sup>13</sup>C NMR (101 MHz, CDCl<sub>3</sub>)  $\delta$  155.43, 139.61, 122.62, 113.08, 21.31.

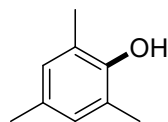

2,4,6-trimethylphenol (**3f**)<sup>12</sup>: 93% yield; <sup>1</sup>H NMR (400 MHz, Chloroform-*d*)  $\delta$  6.71 (s, 1H), 4.38 (s, 1H), 2.14 (s, 3H), 2.13 (s, 6H). <sup>13</sup>C NMR (101 MHz, CDCl<sub>3</sub>)  $\delta$  149.94, 129.36, 129.18, 122.85, 20.46, 15.90.

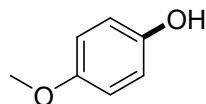

4-methoxyphenol (**3g**)<sup>12</sup>: 99% yield; <sup>1</sup>H NMR (400 MHz, Chloroform-*d*)  $\delta$  6.96 – 6.61 (m, 4H), 4.99 (s, 1H), 3.81 (s, 3H). <sup>13</sup>C NMR (101 MHz, CDCl<sub>3</sub>)  $\delta$  153.74, 149.55, 116.14, 114.96, 55.91.

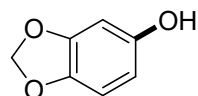

benzo[*d*][1,3]dioxol-5-ol (**3h**)<sup>5</sup>: 83% yield; <sup>1</sup>H NMR (400 MHz, Chloroform-*d*)  $\delta$  6.69 (d,  $J$  = 8.3 Hz, 1H), 6.47 (d,  $J$  = 2.5 Hz, 1H), 6.31 – 6.27 (m, 1H), 5.95 (s, 2H), 4.79 (s, 1H). <sup>13</sup>C NMR (101 MHz, CDCl<sub>3</sub>)  $\delta$  150.69, 148.34, 141.63, 108.20, 106.70, 101.23, 98.35.

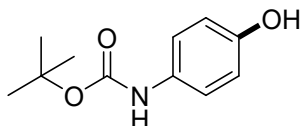

*tert*-butyl(4-hydroxyphenyl)carbamate (**3i**)<sup>15</sup>: 81% yield; <sup>1</sup>H NMR (400 MHz, Chloroform-*d*)  $\delta$  7.20 (d,  $J$  = 8.3 Hz, 2H), 6.77 (d,  $J$  = 8.8 Hz, 2H), 6.39 (s, 1H), 5.49 (s, 1H), 1.55 (s, 9H). <sup>13</sup>C NMR (101 MHz, CDCl<sub>3</sub>)  $\delta$  153.74, 152.24, 130.83, 121.64, 115.82, 80.56, 28.44.

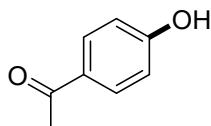

1-(4-hydroxyphenyl)ethan-1-one (**3j**)<sup>10</sup>: 85% yield; <sup>1</sup>H NMR (400 MHz, Chloroform-*d*)  $\delta$  7.95 (d,  $J$  = 8.8 Hz, 2H), 7.76 (s, 1H), 6.99 (d,  $J$  = 8.8 Hz, 2H), 2.63 (s, 3H). <sup>13</sup>C NMR (101 MHz, CDCl<sub>3</sub>)  $\delta$  198.70, 161.42, 131.31, 129.63, 115.62, 26.39.

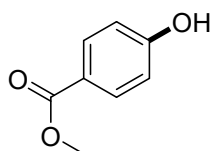

methyl 4-hydroxybenzoate (**3k**)<sup>10</sup>: 86% yield; <sup>1</sup>H NMR (400 MHz, Chloroform-*d*)  $\delta$  7.99 (d,  $J$  = 8.8 Hz, 2H), 6.93 (d,  $J$  = 8.8 Hz, 2H), 6.74 (s, 1H), 3.94 (s, 3H). <sup>13</sup>C NMR (101 MHz, CDCl<sub>3</sub>)  $\delta$  167.44, 160.27, 132.01, 122.38, 115.33, 52.13.

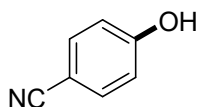

4-hydroxybenzonitrile (**3l**)<sup>10</sup>: 87% yield; <sup>1</sup>H NMR (400 MHz, Chloroform-*d*)  $\delta$  7.57 (d,  $J$  = 8.8 Hz, 2H), 6.94 (d,  $J$  = 8.8 Hz, 2H), 6.30 (s, 1H). <sup>13</sup>C NMR (101 MHz, CDCl<sub>3</sub>)  $\delta$  159.90, 134.37, 119.25, 116.45, 103.58.

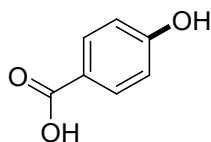

4-hydroxybenzoic acid (**3m**)<sup>5</sup>: 92% yield; <sup>1</sup>H NMR (400 MHz, DMSO-*d*<sub>6</sub>)  $\delta$  12.46 (s, 1H), 10.25 (s, 1H), 7.81 (d,  $J$  = 8.3 Hz, 2H), 6.84 (d,  $J$  = 8.6 Hz, 2H). <sup>13</sup>C NMR (101 MHz, CDCl<sub>3</sub>)  $\delta$  172.40, 166.86, 136.79, 126.56, 120.37.

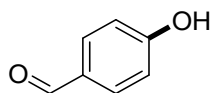

4-hydroxybenzaldehyde (**3n**)<sup>5</sup>: 68% yield; <sup>1</sup>H NMR (400 MHz, Chloroform-*d*)  $\delta$  9.86 (s, 1H), 7.83 (d,  $J = 8.5$  Hz, 2H), 6.99 (d,  $J = 8.4$  Hz, 2H), 6.71 (s, 1H). <sup>13</sup>C NMR (101 MHz, CDCl<sub>3</sub>)  $\delta$  191.51, 161.86, 132.66, 129.76, 116.11.

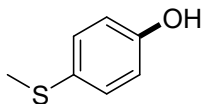

4-(methylthio)phenol (**3o**)<sup>11</sup>: 79% yield; <sup>1</sup>H NMR (400 MHz, Chloroform-*d*)  $\delta$  7.22 (d,  $J = 8.7$  Hz, 2H), 6.78 (d,  $J = 8.6$  Hz, 2H), 5.02 (s, 1H), 2.44 (s, 3H). <sup>13</sup>C NMR (101 MHz, CDCl<sub>3</sub>)  $\delta$  154.09, 130.43, 128.94, 116.13, 18.11.

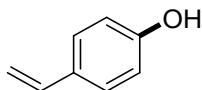

4-vinylphenol (**3p**)<sup>5</sup>: 70% yield; <sup>1</sup>H NMR (400 MHz, Chloroform-*d*)  $\delta$  7.30 (d,  $J = 8.3$  Hz, 2H), 6.79 (d,  $J = 8.5$  Hz, 2H), 6.64 (dd,  $J = 17.5, 10.9$  Hz, 1H), 5.60 (d,  $J = 17.6$  Hz, 1H), 5.12 (d,  $J = 10.8$  Hz, 1H), 4.95 (s, 1H). <sup>13</sup>C NMR (101 MHz, CDCl<sub>3</sub>)  $\delta$  155.29, 136.18, 130.73, 127.67, 115.43, 111.73.

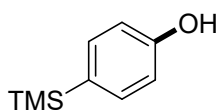

4-(trimethylsilyl)phenol (**3q**)<sup>12</sup>: 90% yield; <sup>1</sup>H NMR (400 MHz, Chloroform-*d*)  $\delta$  7.40 (d,  $J = 7.3$  Hz, 2H), 6.83 (d,  $J = 7.2$  Hz, 2H), 5.15 (s, 1H), 0.23 (d,  $J = 1.2$  Hz, 9H). <sup>13</sup>C NMR (101 MHz, CDCl<sub>3</sub>)  $\delta$  156.20, 135.02, 131.68, 114.95, -0.88.

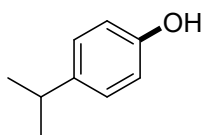

4-isopropylphenol (**3r**)<sup>12</sup>: 91% yield; <sup>1</sup>H NMR (400 MHz, Chloroform-*d*)  $\delta$  7.11 (d,  $J = 8.5$  Hz, 2H), 6.78 (d,  $J = 8.4$  Hz, 2H), 4.96 (s, 1H), 2.86 (p,  $J = 6.9$  Hz, 1H), 1.23 (d,  $J = 6.9$  Hz, 6H). <sup>13</sup>C NMR (101 MHz, CDCl<sub>3</sub>)  $\delta$  153.49, 141.29, 127.52, 115.15, 33.33, 24.27.



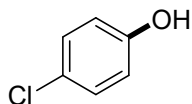

4-chlorophenol (**3s**)<sup>12</sup>: 85% yield; <sup>1</sup>H NMR (400 MHz, Chloroform-*d*)  $\delta$  7.18 (d,  $J = 8.9$  Hz, 1H), 6.76 (d,  $J = 8.9$  Hz, 1H), 5.37 (s, 1H). <sup>13</sup>C NMR (101 MHz, CDCl<sub>3</sub>)  $\delta$  154.08, 129.62, 125.79, 116.76.

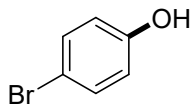

4-bromophenol (**3t**)<sup>5</sup>: 84% yield; <sup>1</sup>H NMR (400 MHz, Chloroform-*d*)  $\delta$  7.37 (d,  $J = 6.7$  Hz, 1H), 6.76 (d,  $J = 6.6$  Hz, 1H). <sup>13</sup>C NMR (101 MHz, CDCl<sub>3</sub>)  $\delta$  154.56, 132.56, 117.27, 113.04.

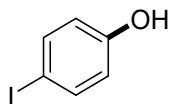

4-iodophenol (**3u**)<sup>5</sup>: 86% yield; <sup>1</sup>H NMR (400 MHz, Chloroform-*d*)  $\delta$  7.44 (d,  $J = 8.8$  Hz, 1H), 6.55 (d,  $J = 8.8$  Hz, 1H), 5.11 (s, 1H). <sup>13</sup>C NMR (101 MHz, CDCl<sub>3</sub>)  $\delta$  155.36, 138.53, 117.89, 82.81.

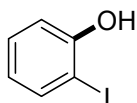

2-iodophenol (**3v**)<sup>12</sup>: 88% yield; <sup>1</sup>H NMR (400 MHz, Chloroform-*d*)  $\delta$  7.70 (d,  $J = 7.9$  Hz, 1H), 7.34 – 7.28 (m, 1H), 7.04 (d,  $J = 8.2$  Hz, 1H), 6.76 – 6.68 (m, 1H), 5.31 (s, 1H). <sup>13</sup>C NMR (101 MHz, CDCl<sub>3</sub>)  $\delta$  154.84, 138.32, 130.29, 122.50, 115.22, 85.82.

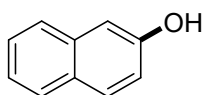

naphthalen-2-ol (**3w**)<sup>5</sup>: 80% yield; <sup>1</sup>H NMR (400 MHz, Chloroform-*d*)  $\delta$  7.76 (t,  $J = 8.5$  Hz, 2H), 7.67 (dd,  $J = 8.2, 1.2$  Hz, 1H), 7.47 – 7.39 (m, 1H), 7.36 – 7.30 (m, 1H), 7.14 (d,  $J = 2.5$  Hz, 1H), 7.10 (dd,  $J = 8.8, 2.6$  Hz, 1H), 5.28 (s, 1H). <sup>13</sup>C NMR (101 MHz, CDCl<sub>3</sub>)  $\delta$  153.39, 134.65, 129.93, 129.00, 127.84, 126.61, 126.44, 123.70, 117.82, 109.58.

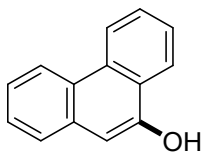

phenanthren-9-ol (**3x**)<sup>5</sup>: 81% yield; <sup>1</sup>H NMR (400 MHz, Chloroform-*d*) δ 8.67 (d, *J* = 8.1 Hz, 1H), 8.62 – 8.56 (m, 1H), 8.39 – 8.27 (m, 1H), 7.77 – 7.61 (m, 3H), 7.57 – 7.45 (m, 2H), 6.99 (s, 1H), 5.33 (s, 1H). <sup>13</sup>C NMR (101 MHz, CDCl<sub>3</sub>) δ 149.54, 132.71, 131.60, 127.29, 127.01, 126.79, 126.48, 125.58, 124.35, 122.77, 122.65, 122.40, 106.16.

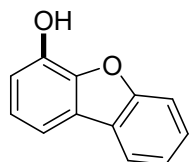

dibenzo[*b,d*]furan-4-ol (**3y**)<sup>5</sup>: 88% yield; <sup>1</sup>H NMR (400 MHz, Chloroform-*d*) δ 7.91 – 7.77 (m, 1H), 7.53 – 7.44 (m, 1H), 7.41 (dd, *J* = 7.8, 1.1 Hz, 1H), 7.39 – 7.33 (m, 1H), 7.25 (t, *J* = 7.5, 1.0 Hz, 1H), 7.12 (t, *J* = 7.8 Hz, 1H), 6.93 (dd, *J* = 7.9, 1.1 Hz, 1H), 5.51 (s, 1H). <sup>13</sup>C NMR (101 MHz, CDCl<sub>3</sub>) δ 156.11, 144.12, 141.19, 127.34, 125.82, 124.65, 123.75, 123.06, 121.09, 113.68, 112.88, 111.85.

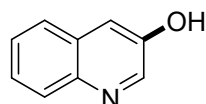

quinolin-3-ol (**3z**)<sup>11</sup>: 73% yield; <sup>1</sup>H NMR (400 MHz, DMSO-*d*<sub>6</sub>) δ 10.32 (s, 1H), 8.60 (d, *J* = 2.6 Hz, 1H), 8.04 – 7.87 (m, 1H), 7.85 – 7.69 (m, 2H), 7.61 – 7.46 (m, 4H). <sup>13</sup>C NMR (101 MHz, DMSO) δ 151.39, 144.41, 142.93, 129.54, 129.11, 127.22, 127.03, 126.34, 115.78.

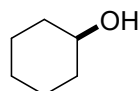

Cyclohexanol (**3aa**)<sup>10</sup>: 46% yield; <sup>1</sup>H NMR (400 MHz, Chloroform-*d*) δ 3.71 – 3.51 (m, 1H), 2.00 – 1.84 (m, 2H), 1.76 – 1.68 (m, 2H), 1.63 – 1.44 (m, 1H), 1.38 – 1.13 (m, 5H). <sup>13</sup>C NMR (101 MHz, CDCl<sub>3</sub>) δ 70.31, 35.56, 25.49, 24.18.

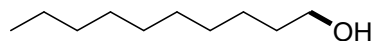

decan-1-ol (**3ab**)<sup>11</sup>: 60% yield; <sup>1</sup>H NMR (400 MHz, Chloroform-*d*) δ 3.64 (t, *J* = 6.6 Hz, 2H), 1.63 – 1.52 (m, 2H), 1.49 (s, 1H), 1.40 – 1.18 (m, 14H), 0.88 (t, *J* = 6.6 Hz, 3H). <sup>13</sup>C NMR (101 MHz, CDCl<sub>3</sub>) δ 63.12, 32.84, 31.95, 29.67, 29.61, 29.49, 29.38, 25.79, 22.73, 14.17.

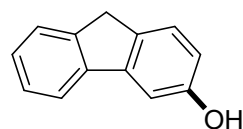

9H-fluoren-3-ol (**3ac**)<sup>14</sup>: 90% yield; <sup>1</sup>H NMR (400 MHz, Chloroform-*d*)  $\delta$  7.73 (d,  $J$  = 7.6 Hz, 1H), 7.68 (d,  $J$  = 8.2 Hz, 1H), 7.54 (d,  $J$  = 7.4 Hz, 1H), 7.46 – 7.35 (m, 1H), 7.29 (d,  $J$  = 7.0 Hz, 1H), 7.07 (d,  $J$  = 2.4 Hz, 1H), 6.94 – 6.84 (m, 1H), 5.02 (s, 1H), 3.89 (s, 2H). <sup>13</sup>C NMR (101 MHz, CDCl<sub>3</sub>)  $\delta$  155.03, 145.43, 142.67, 141.62, 135.01, 126.80, 125.72, 124.92, 120.75, 119.09, 114.14, 112.28, 36.94.

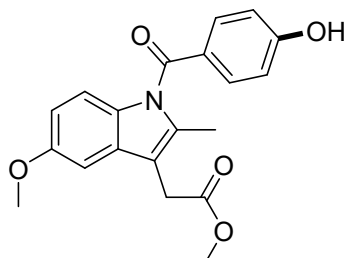

methyl 2-(1-(4-hydroxybenzoyl)-5-methoxy-2-methyl-1H-indol-3-yl)acetate (**3ad**)<sup>5</sup>: 60% yield; <sup>1</sup>H NMR (400 MHz, DMSO-*d*<sub>6</sub>)  $\delta$  10.56 (s, 1H), 7.56 (d,  $J$  = 8.7 Hz, 2H), 7.03 (d,  $J$  = 2.5 Hz, 1H), 6.93 (d,  $J$  = 8.7 Hz, 2H), 6.88 (d,  $J$  = 8.9 Hz, 1H), 6.71 (dd,  $J$  = 9.0, 2.5 Hz, 1H), 3.80 (s, 2H), 3.78 (s, 3H), 3.65 (s, 3H), 2.29 (s, 3H). <sup>13</sup>C NMR (101 MHz, DMSO)  $\delta$  171.71, 168.85, 162.81, 155.66, 136.03, 132.88, 131.06, 130.53, 125.72, 116.12, 114.54, 111.86, 111.65, 101.78, 55.89, 52.27, 29.69, 13.19.

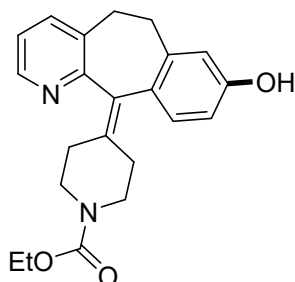

ethyl 4-(8-hydroxy-5,6-dihydro-11H-benzo[5,6]cyclohepta[1,2-b]pyridin-11-ylidene)piperidine-1-carboxylate (**3ae**)<sup>5</sup>: 62% yield; <sup>1</sup>H NMR (400 MHz, Chloroform-*d*)  $\delta$  8.38 – 8.30 (m, 1H), 7.49 (dd,  $J$  = 7.7, 1.7 Hz, 1H), 7.12 (dd,  $J$  = 7.7, 4.9 Hz, 1H), 6.90 (d,  $J$  = 8.2 Hz, 1H), 6.68 (d,  $J$  = 2.4 Hz, 1H), 6.62 (dd,  $J$  = 8.3, 2.5 Hz, 1H), 4.10 (q,  $J$  = 7.1 Hz, 2H), 3.87 – 3.71 (m, 1H), 3.71 – 3.58 (m, 1H), 3.43 – 3.24 (m, 2H), 3.17 – 3.03 (m, 2H), 2.95 – 2.66 (m, 2H), 2.53 – 2.10 (m, 4H), 1.22 (t,  $J$  = 7.1 Hz, 3H). <sup>13</sup>C NMR (101 MHz, CDCl<sub>3</sub>)  $\delta$  158.00, 156.89, 155.62, 145.59, 138.95, 138.11, 136.69, 134.52, 134.12, 130.26, 129.80, 122.40, 116.53, 113.36, 61.40, 44.75, 32.09, 31.57, 30.57, 14.72.

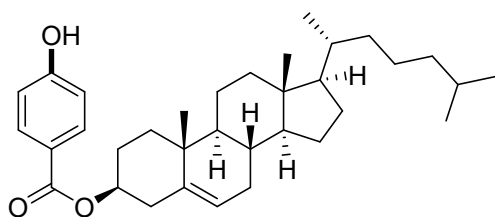

(3*S*,8*S*,9*S*,10*R*,13*R*,14*S*,17*R*)-10,13-dimethyl-17-((*R*)-6-methylheptan-2-yl)-2,3,4,7,8,9,10,11,12,13,14,15,16,17-tetradecahydro-1*H*-cyclopenta[*a*]phenanthren-3-yl 4-hydroxybenzoate: 81% yield (**3af**)<sup>13</sup>; <sup>1</sup>H NMR (400 MHz, Chloroform-*d*) δ 7.95 (d, *J* = 8.3 Hz, 2H), 6.86 (d, *J* = 8.3 Hz, 2H), 5.51 – 5.34 (m, 1H), 4.94 – 4.76 (m, 1H), 2.45 (d, *J* = 8.1 Hz, 2H), 2.07 – 1.77 (m, 7H), 1.73 – 1.43 (m, 7H), 1.42 – 1.29 (m, 10H), 1.19 – 1.13 (m, 3H), 1.03 – 0.98 (m, 2H), 0.92 (d, *J* = 6.5 Hz, 3H), 0.87 (d, *J* = 6.6 Hz, 6H), 0.69 (s, 3H). <sup>13</sup>C NMR (101 MHz, CDCl<sub>3</sub>) δ 165.90, 159.74, 139.75, 131.91, 123.42, 122.78, 115.14, 74.44, 56.75, 56.20, 50.09, 42.38, 39.58, 38.33, 37.09, 36.71, 35.86, 31.99, 31.94, 28.29, 28.07, 27.99, 23.90, 22.87, 22.62, 21.11, 19.43, 18.77, 11.92.

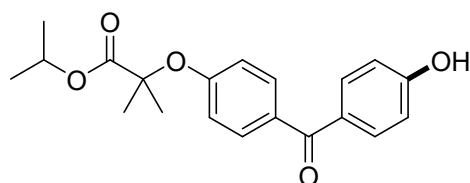

isopropyl 2-(4-(4-hydroxybenzoyl)phenoxy)-2-methylpropanoate (**3ag**)<sup>5</sup>: 75% yield; <sup>1</sup>H NMR (400 MHz, Chloroform-*d*) δ 7.72 (d, *J* = 4.8 Hz, 2H), 7.69 (d, *J* = 4.5 Hz, 2H), 6.90 (d, *J* = 8.7 Hz, 2H), 6.86 (d, *J* = 8.8 Hz, 2H), 5.09 (p, *J* = 6.3 Hz, 1H), 1.65 (s, 6H), 1.21 (d, *J* = 6.3 Hz, 6H). <sup>13</sup>C NMR (101 MHz, CDCl<sub>3</sub>) δ 195.29, 173.48, 160.39, 159.29, 132.71, 131.91, 131.20, 130.10, 117.35, 115.27, 79.45, 69.53, 25.43, 21.56.

All the <sup>19</sup>F NMR were conducted in MeCN without adding deuterium reagent.

## (G) References

- (1) B. Holmes, J. Lee, K. A. Landon, A. Benavides-Serrato, T. Bashir, M. E. Jung, A. Lichtenstein and J. Gera, *J. Biol. Chem.*, 2016, **291**, 14146-14159.
- (2) Y. Li, J. Zhang, D. Li and Y. Chen, *Org. Lett.*, 2018, **20**, 3296-3299.
- (3) R. Samanta, J. O. Bauer, C. Strohmann and A. P. Antonchick, *Org. Lett.*, 2012, **14**, 5518–5521.
- (4) A. Iyer, S. Jockusch and J. Sivaguru, *Chem. Commun.*, 2017, **53**, 1692-1695.
- (5) Y. Jia, J. Meng, D. Hu, H. Kang and X. Jiang, *Org. Chem. Front.*, 2023, **10**, 2688-2694.
- (6) P.-F. Dai, X.-S. Ning, H. Wang, X.-C. Cui, J. Liu, J.-P. Qu and Y.-B. Kan, *Angew. Chem. Int. Ed.*, 2019, **58**, 5392-5395.
- (7) A. Gualandi, A. Savoini, R. Saporetto, P. Franchi, M. Lucarini and P. G. Cozzi, *Org. Chem. Front.*, 2018, **5**, 1573-1578.
- (8) X. Zhang, K. P. Rakesh, L. Ravindar and H.-L. Qin, *Green Chem.*, 2018, **20**, 4790–4833.
- (9) W. Yin, X. Pan, W. Leng, J. Chen and H. He, *Green Chem.*, 2019, **21**, 4614-4618.
- (10) C.-H. Fan, T. Xu, Z. Ke and Y.-Y. Yeung, *Org. Chem. Front.*, 2022, **9**, 4091-4096.
- (11) L. Wei, J. Zhang and L. Xu, *ACS Sustainable Chem. Eng.*, 2020, **8**, 13894-13899.
- (12) Y.-T. Xu, C.-Y. Li, X.-B. Huang, W.-X. Gao, Y.-B. Zhou, M.-C. Liu and H.-Y. Wu, *Green Chem.*, 2019, **21**, 4971-4975.
- (13) L. Min, J. Lin and W. Shu, *Chin. J. Chem.*, 2023, **41**, 2773-2778.
- (14) D. L. J. Clive and R. Sunasee, *Org. Lett.*, 2007, **9**, 2677-2680.
- (15) V. Elumalai and J. H. Hansen, *RSC Adv.*, 2020, **10**, 40582-40587.

# (H) NMR spectra

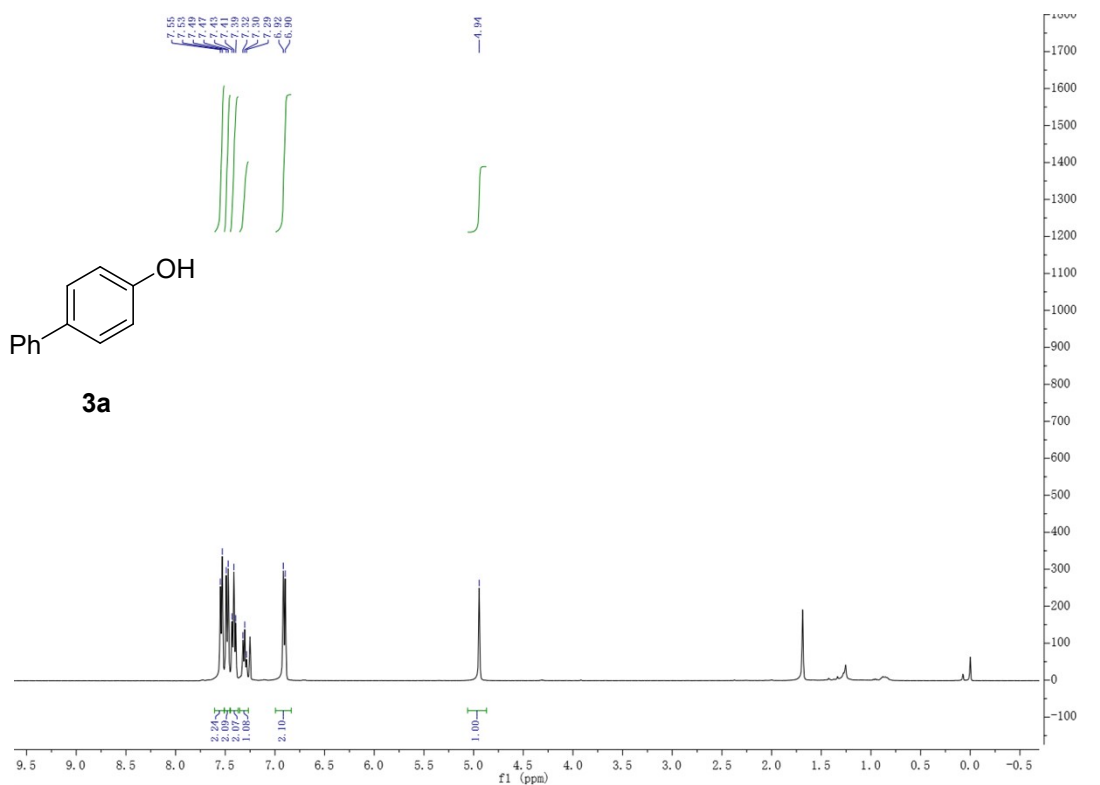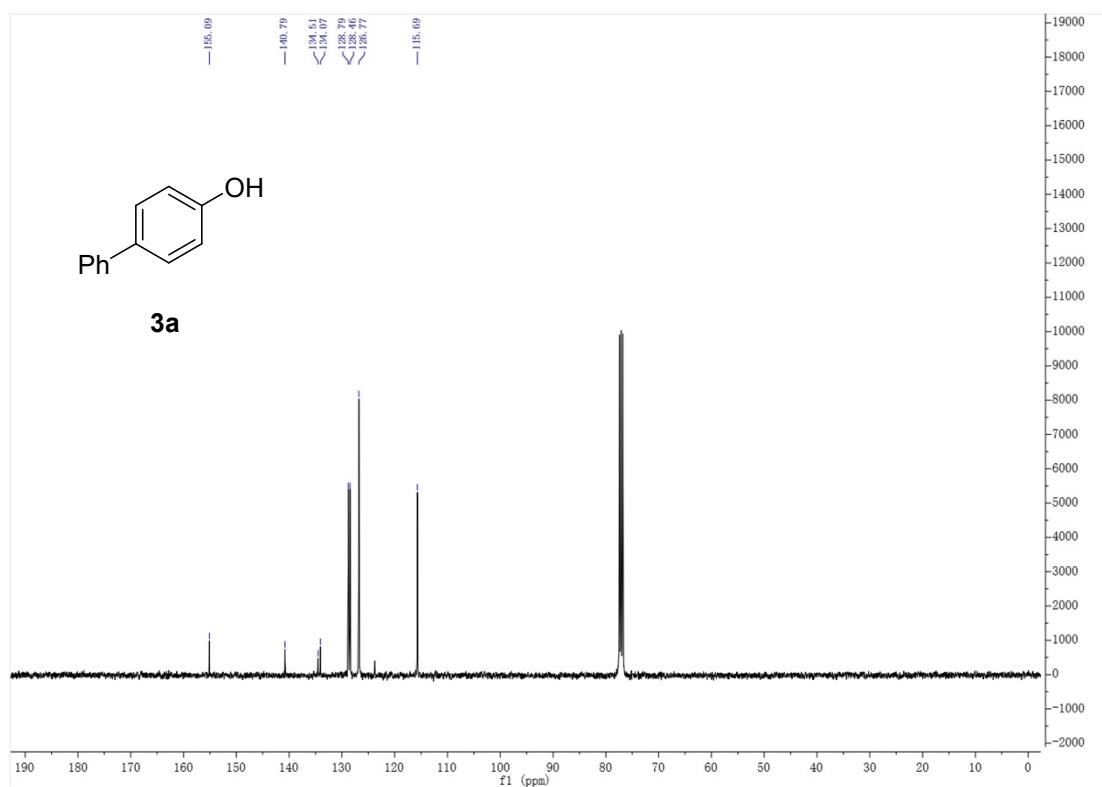

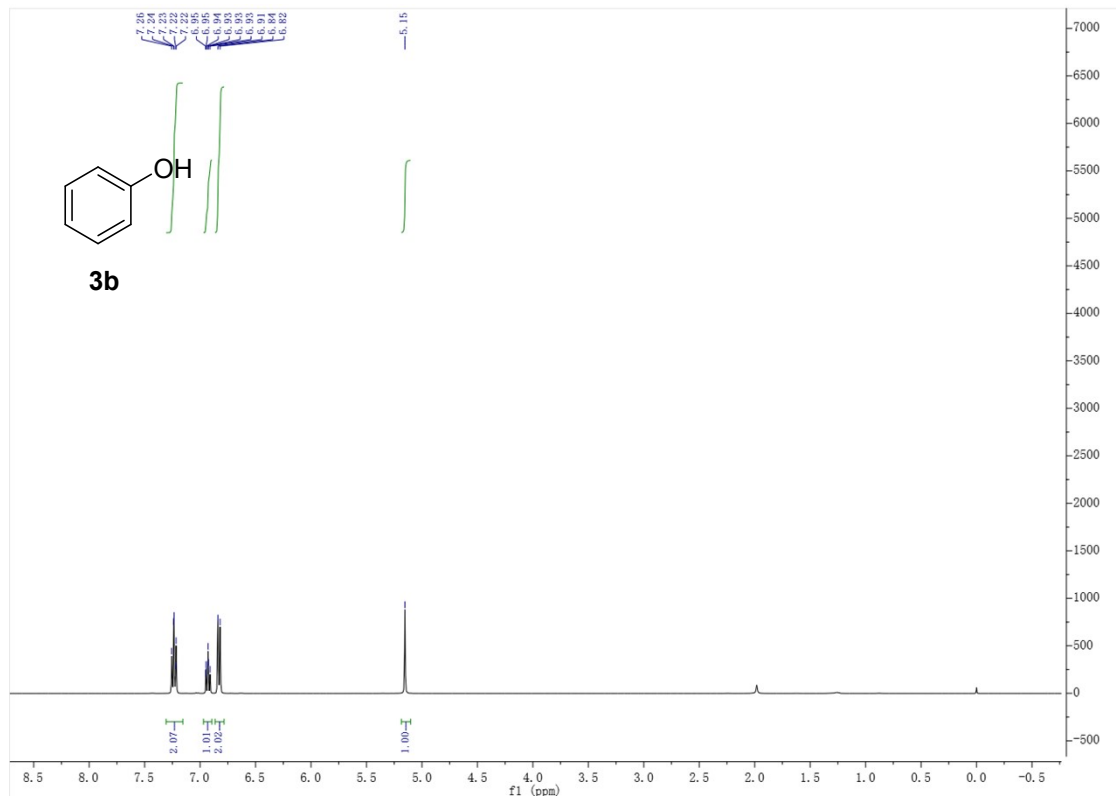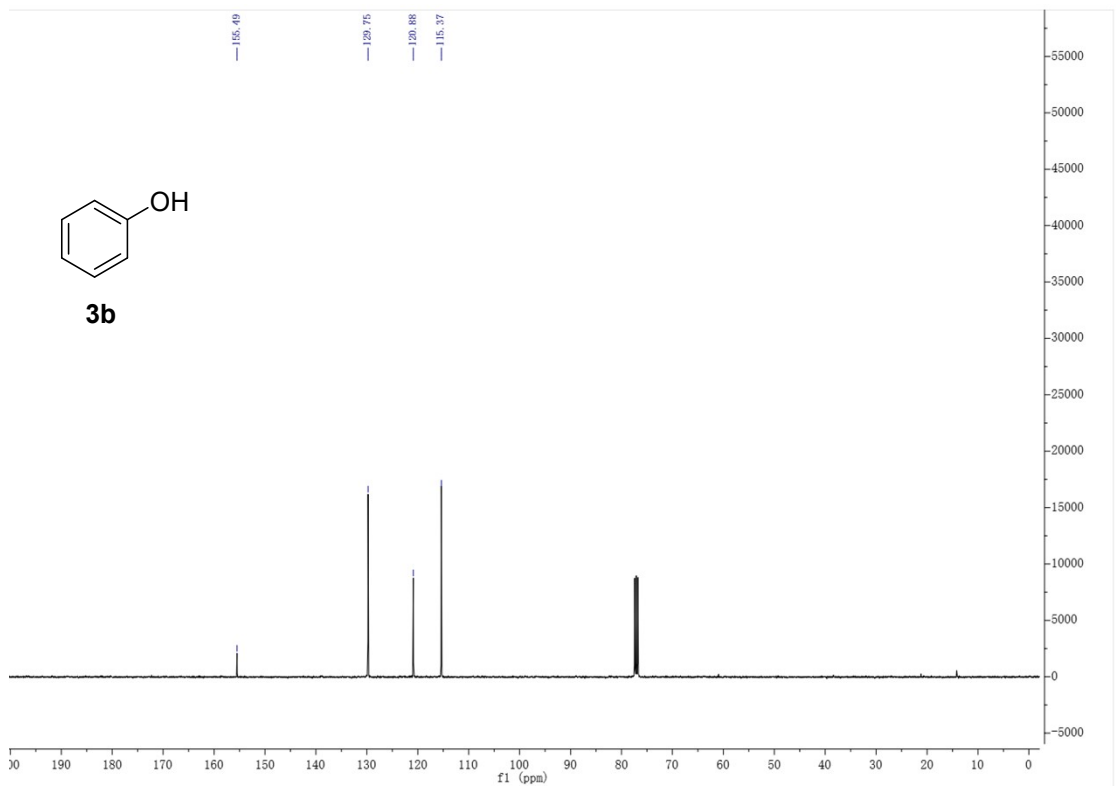

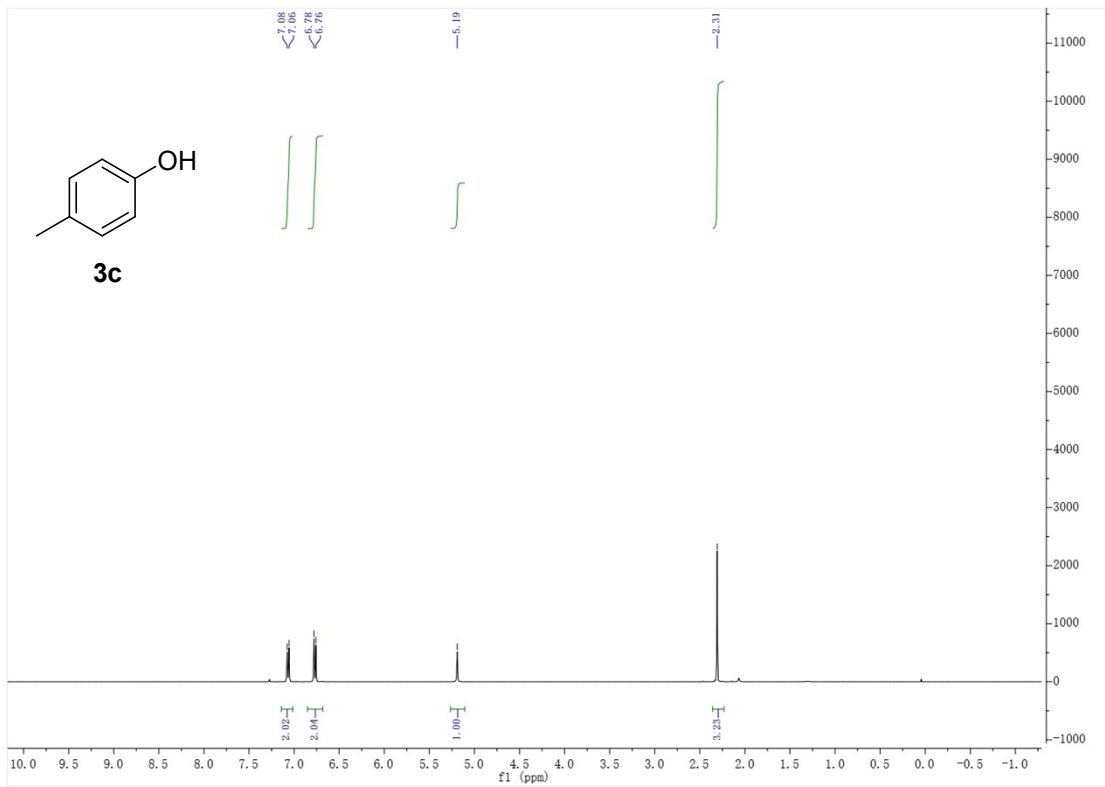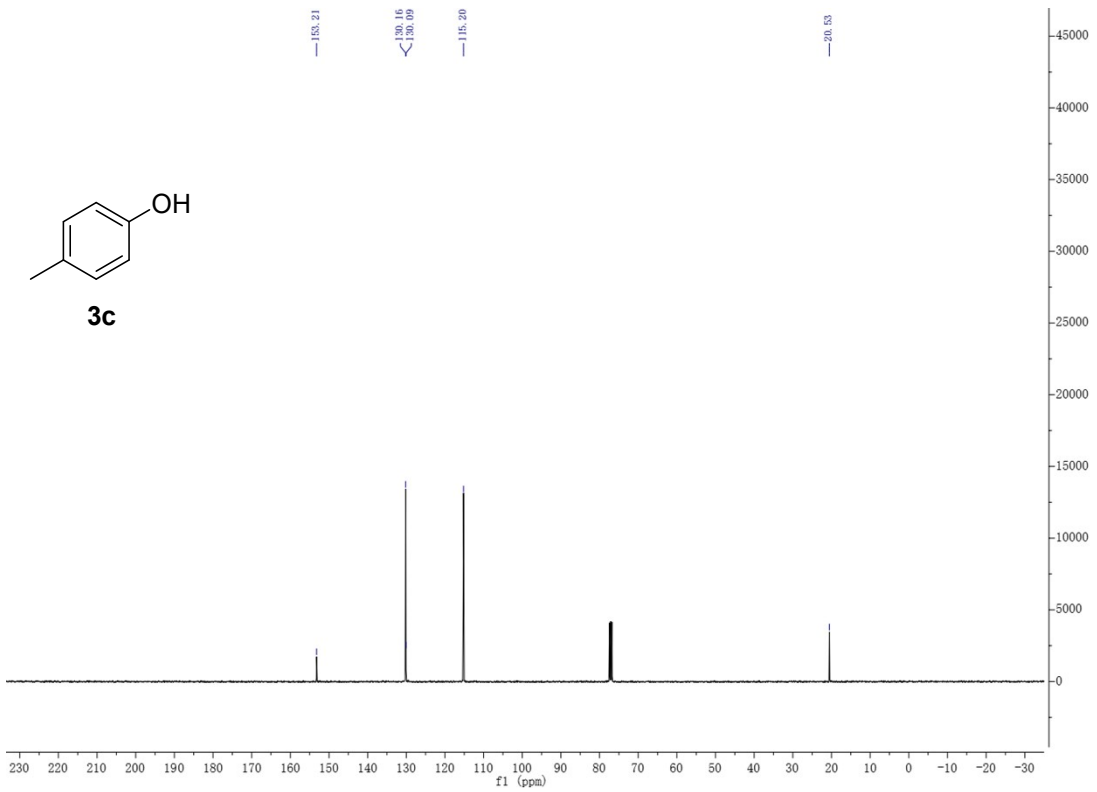



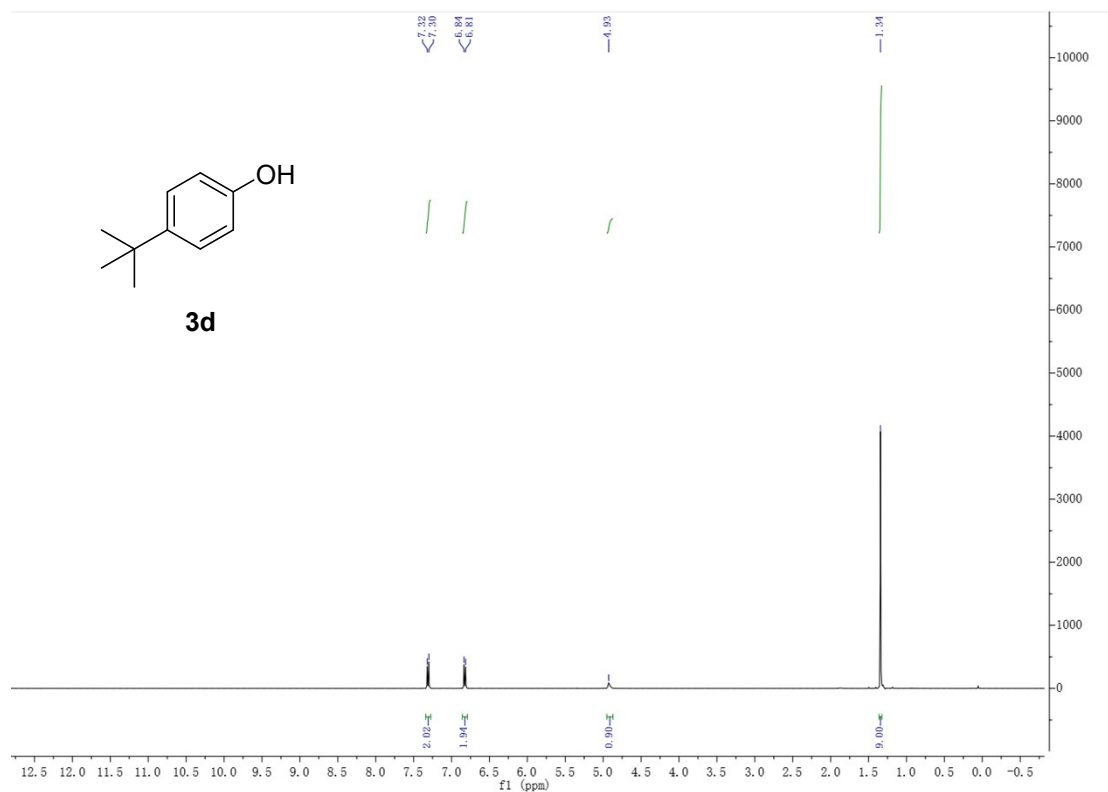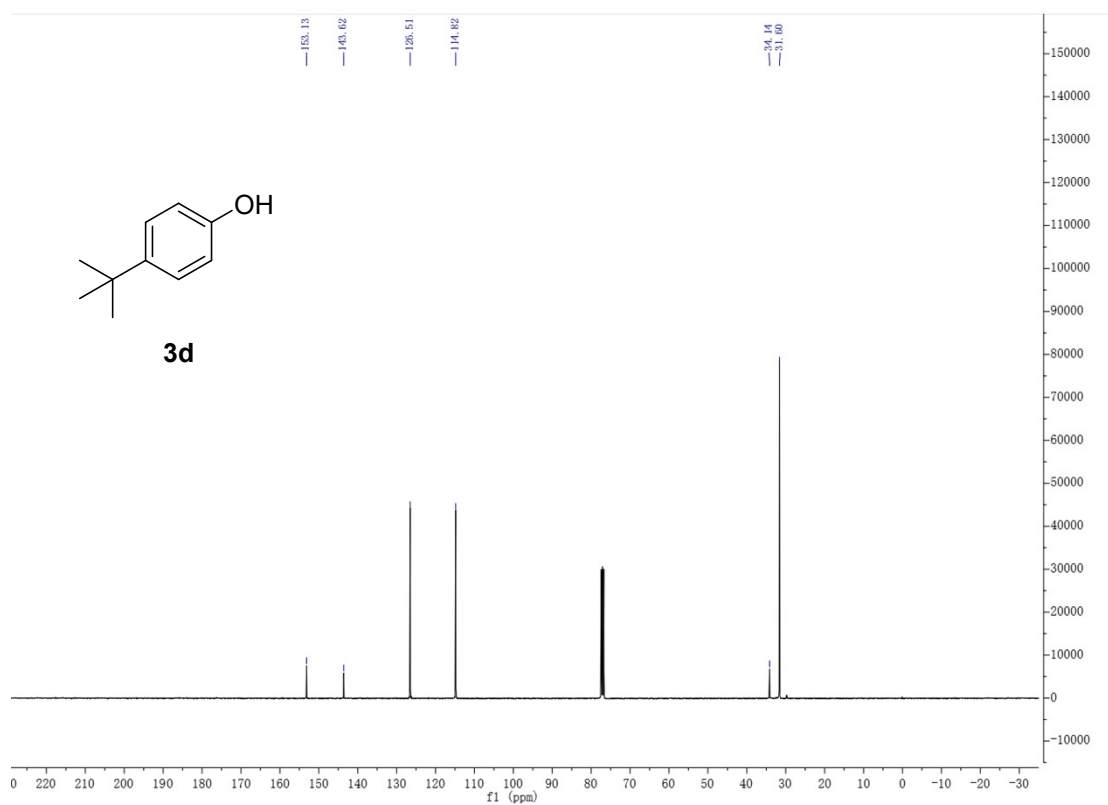

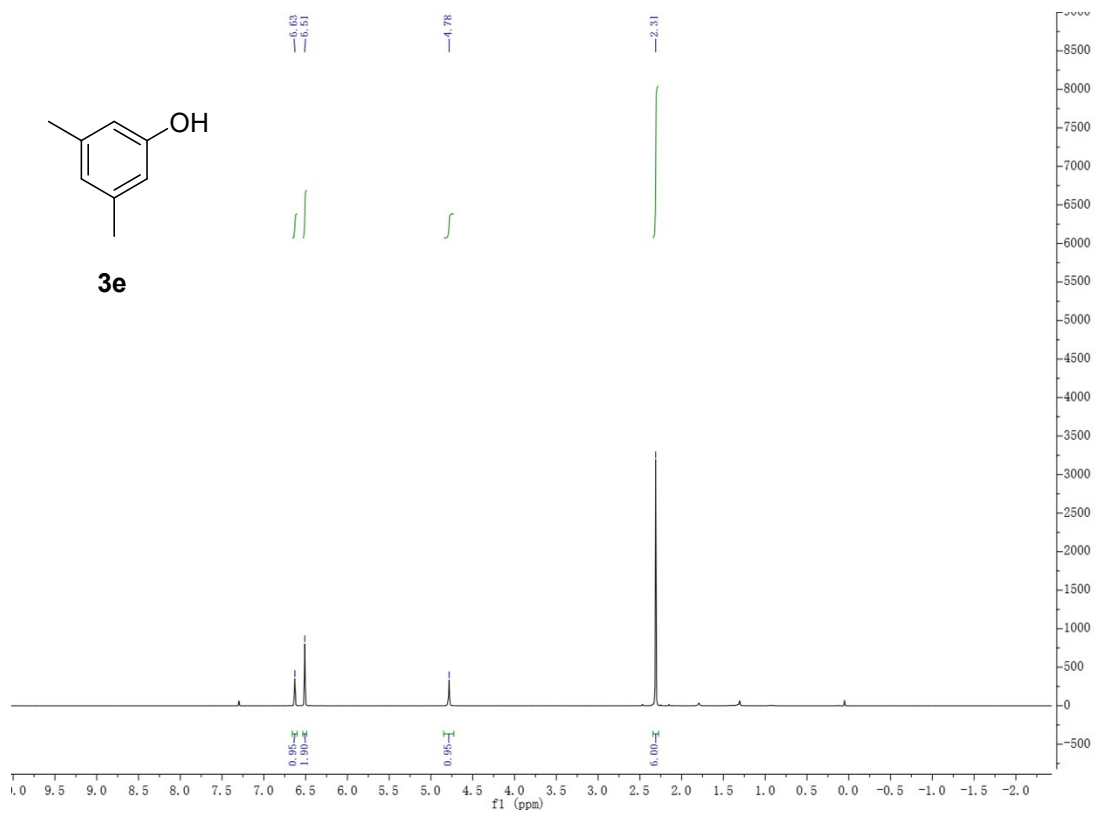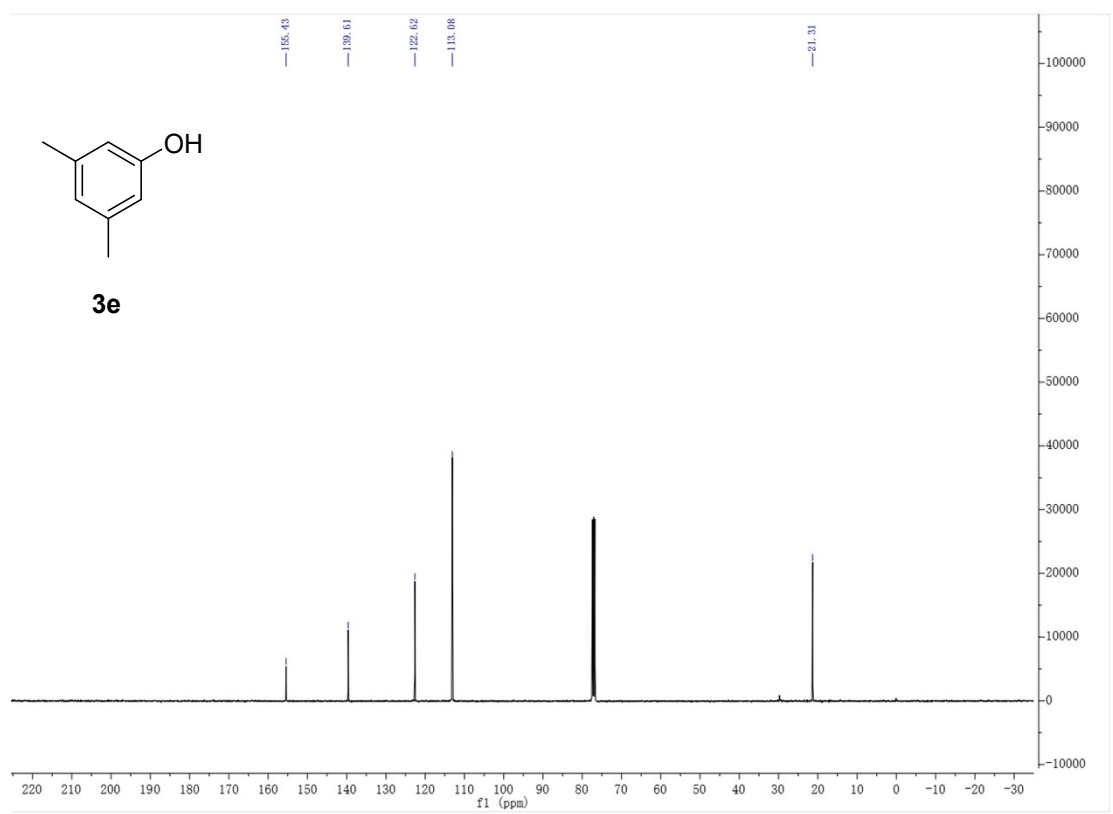

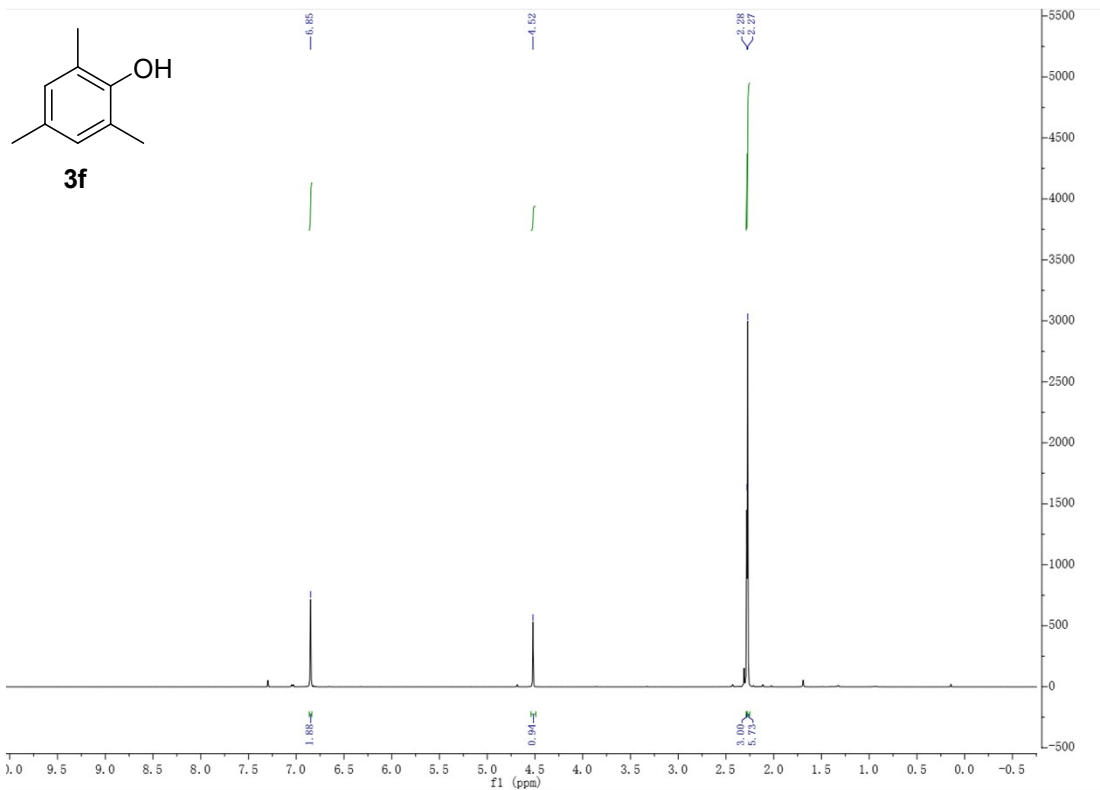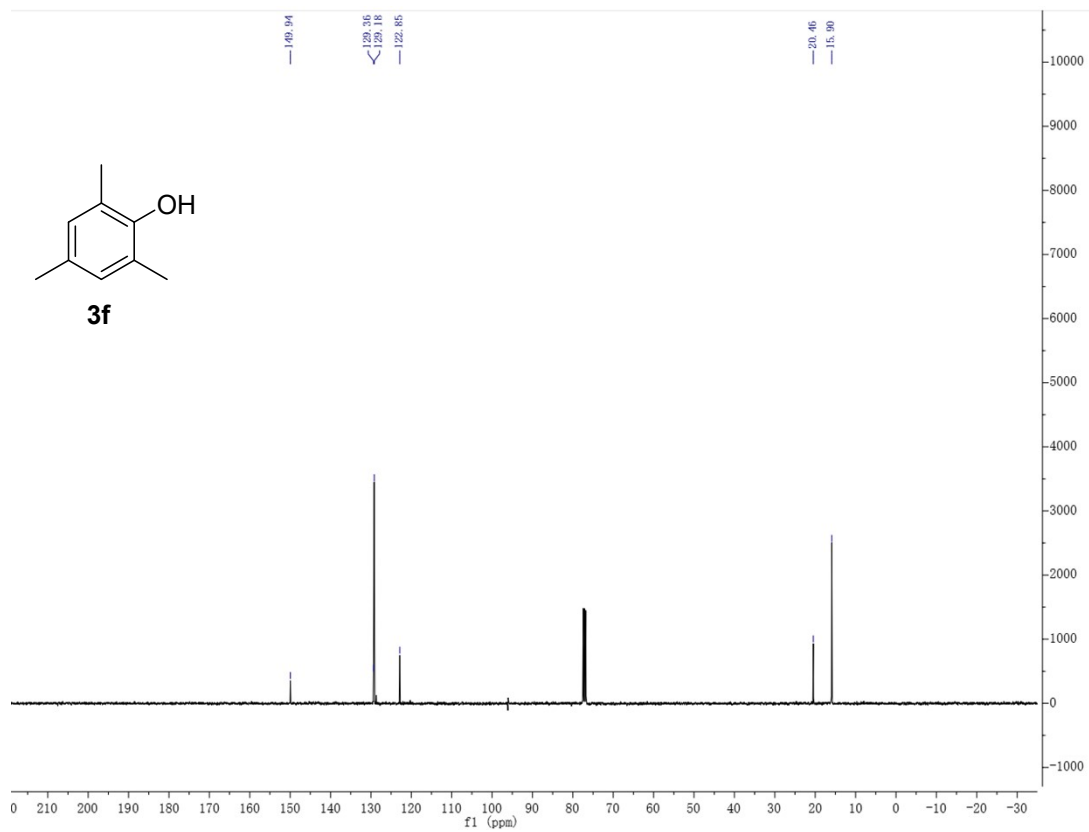

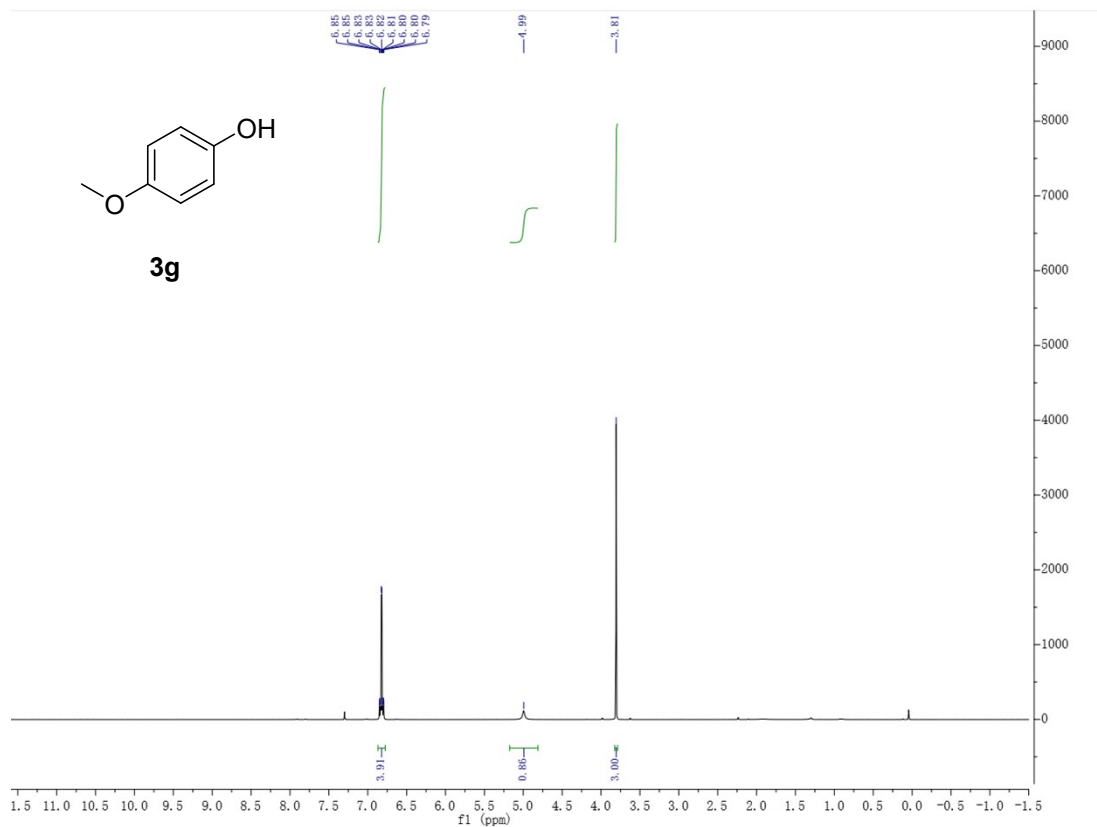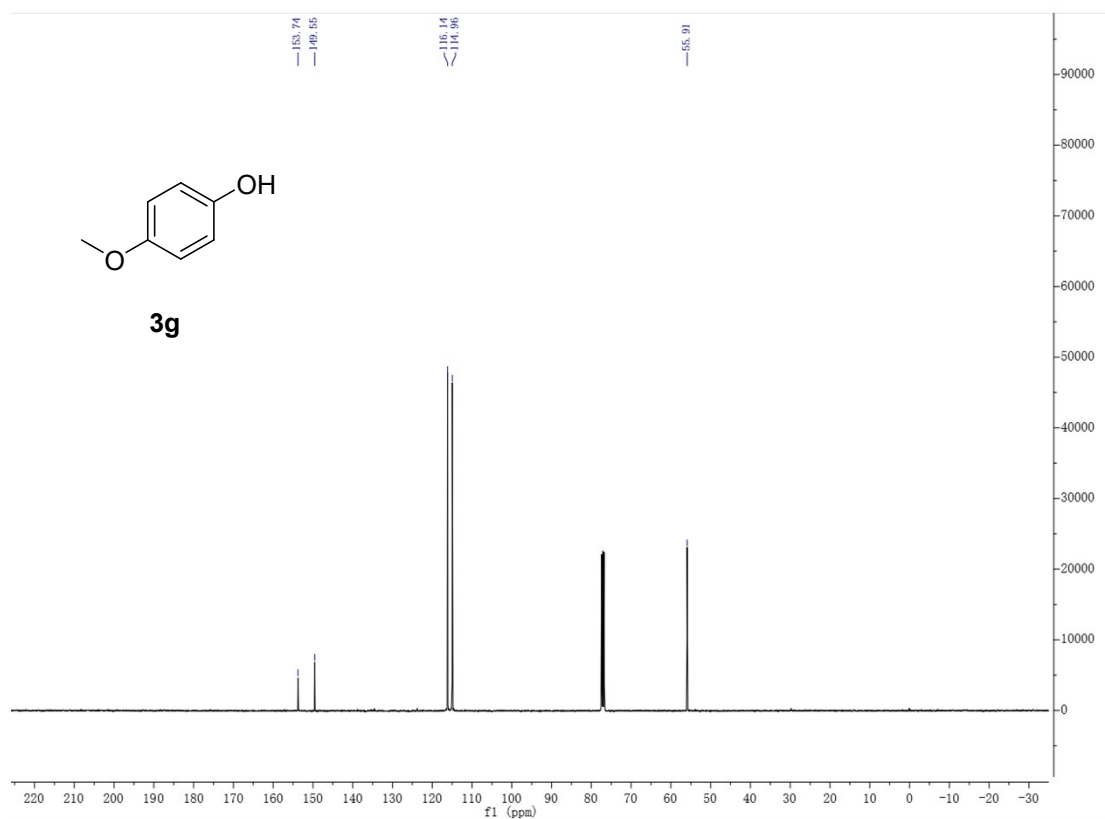

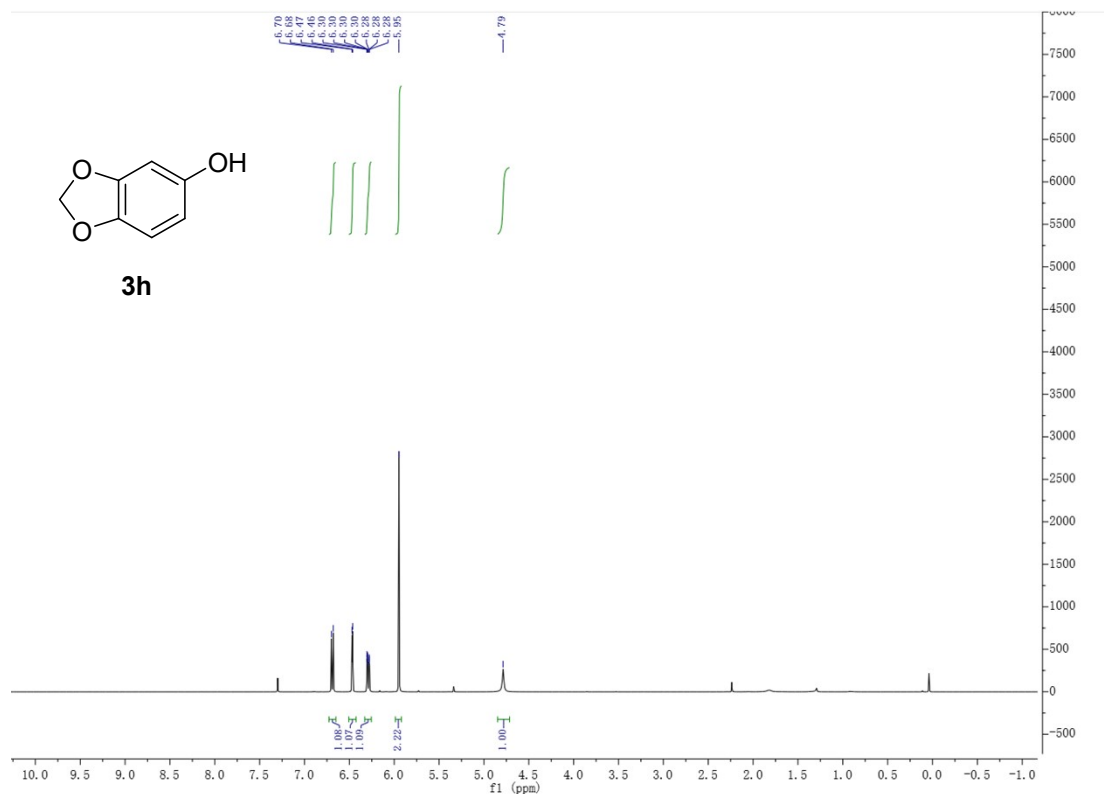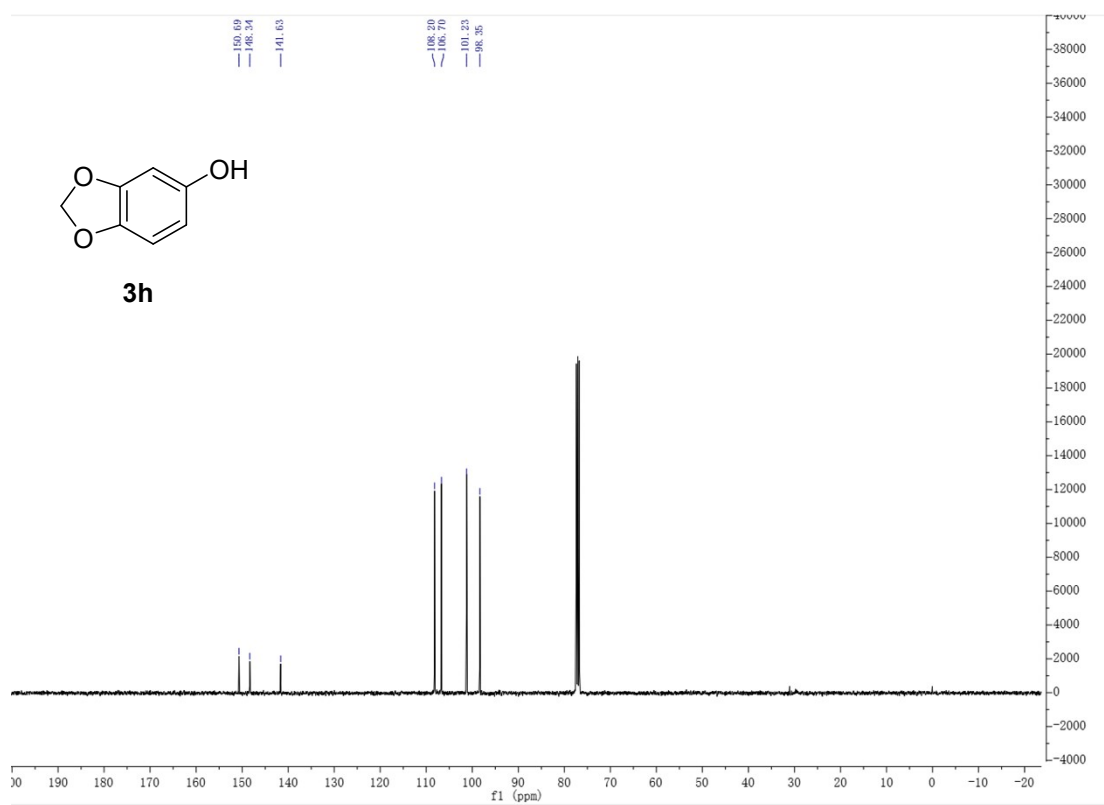

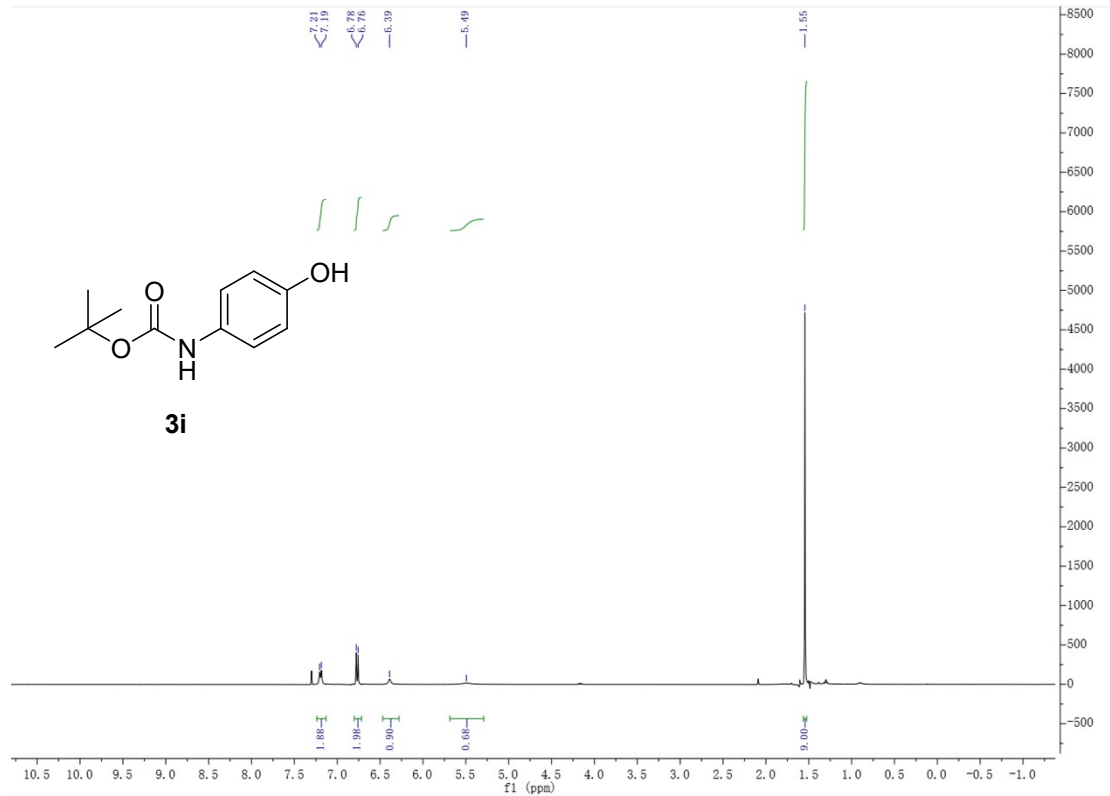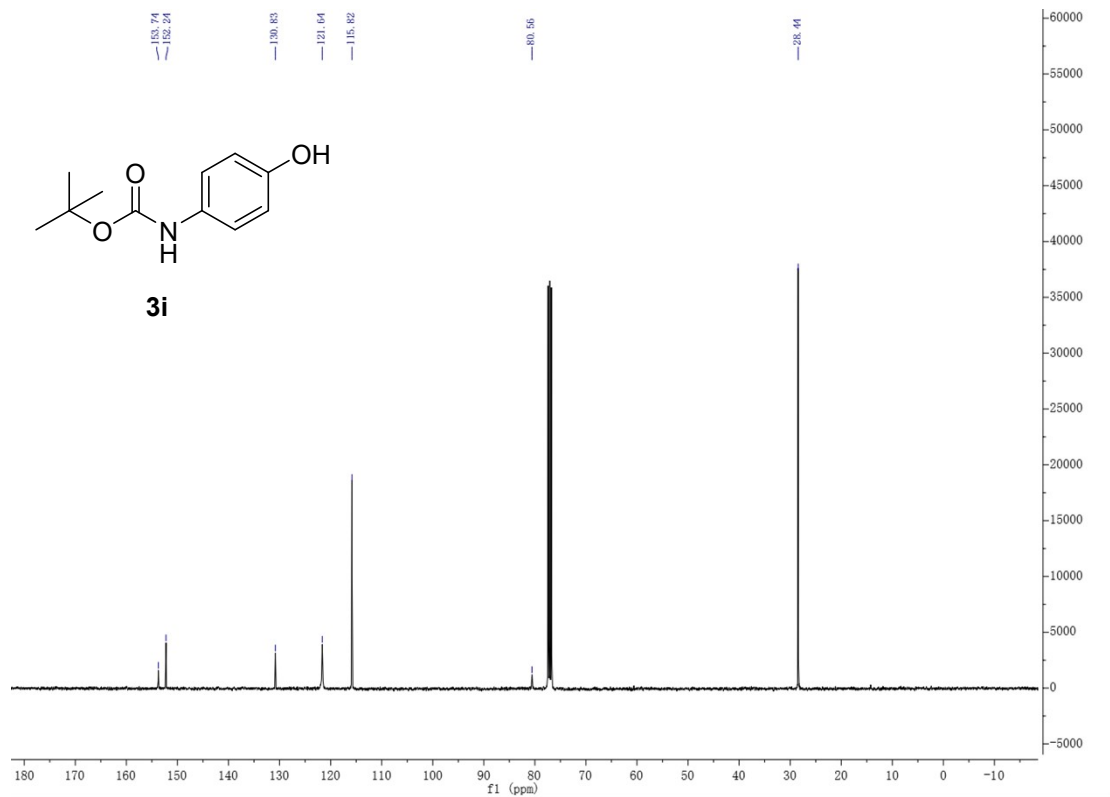

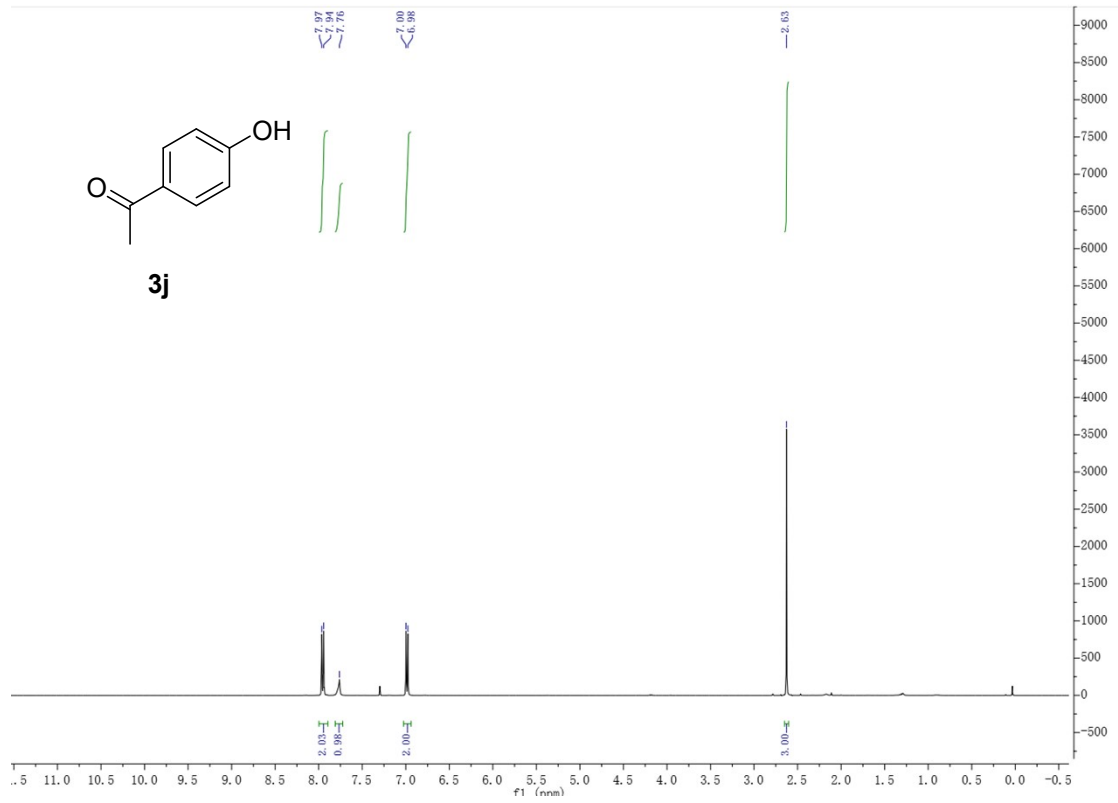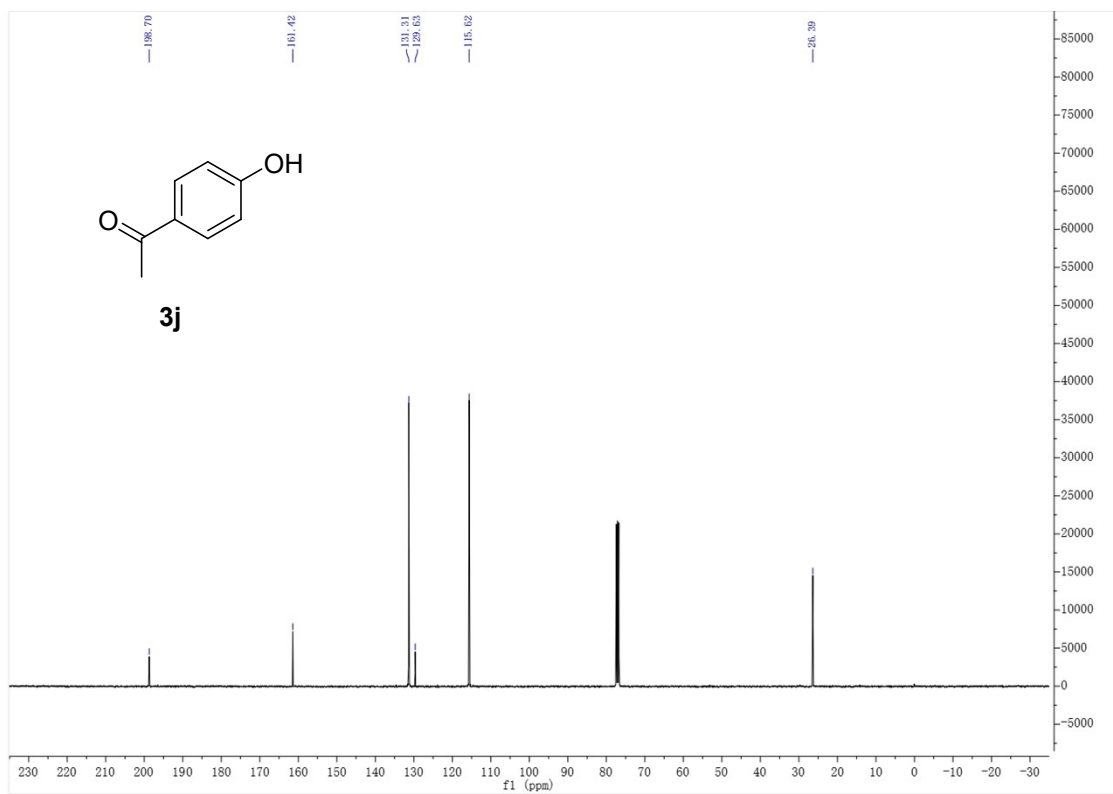

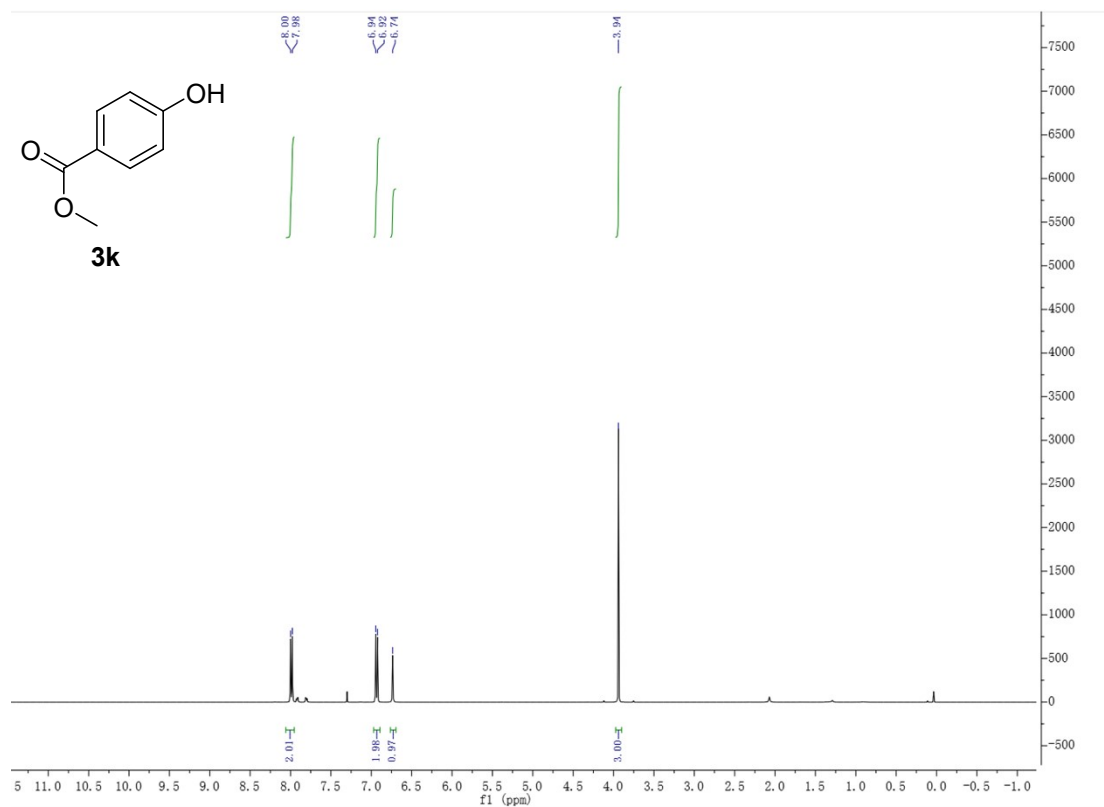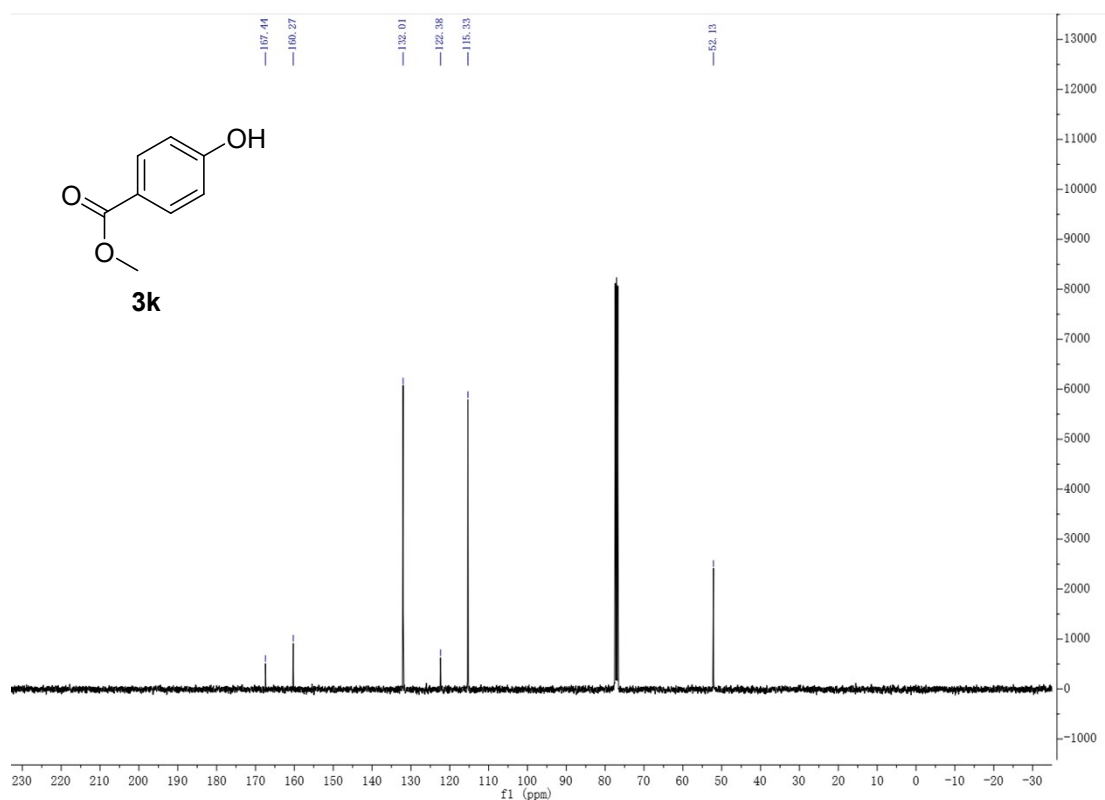



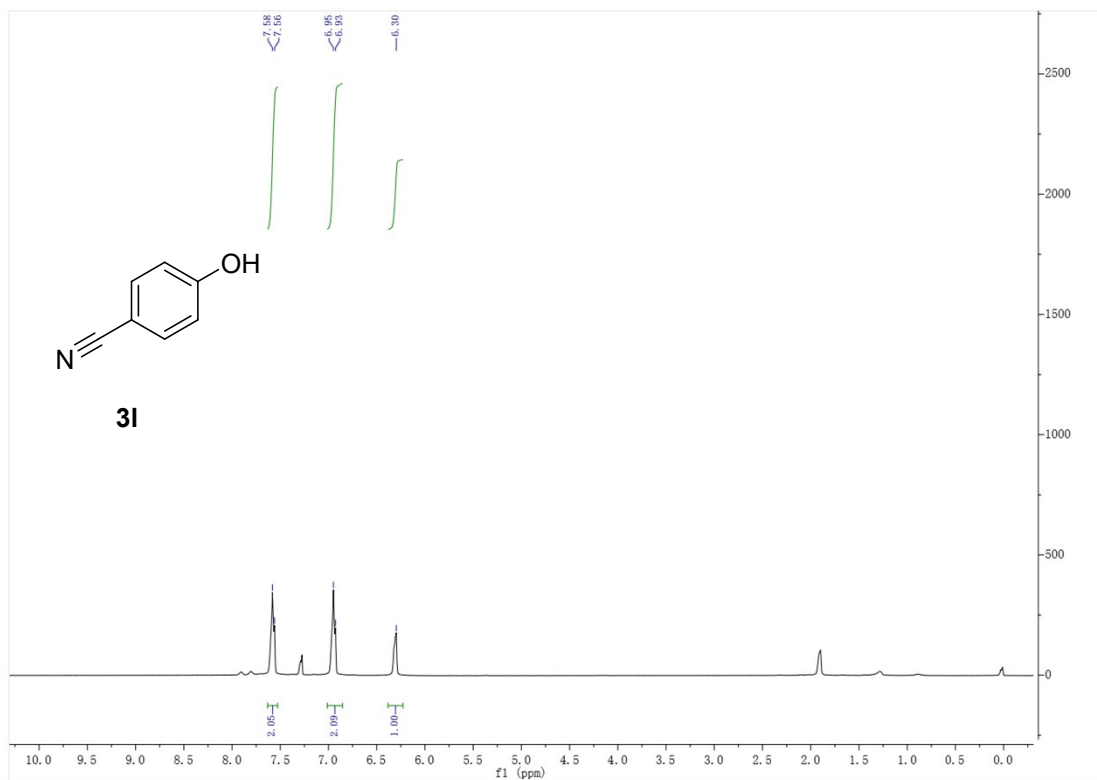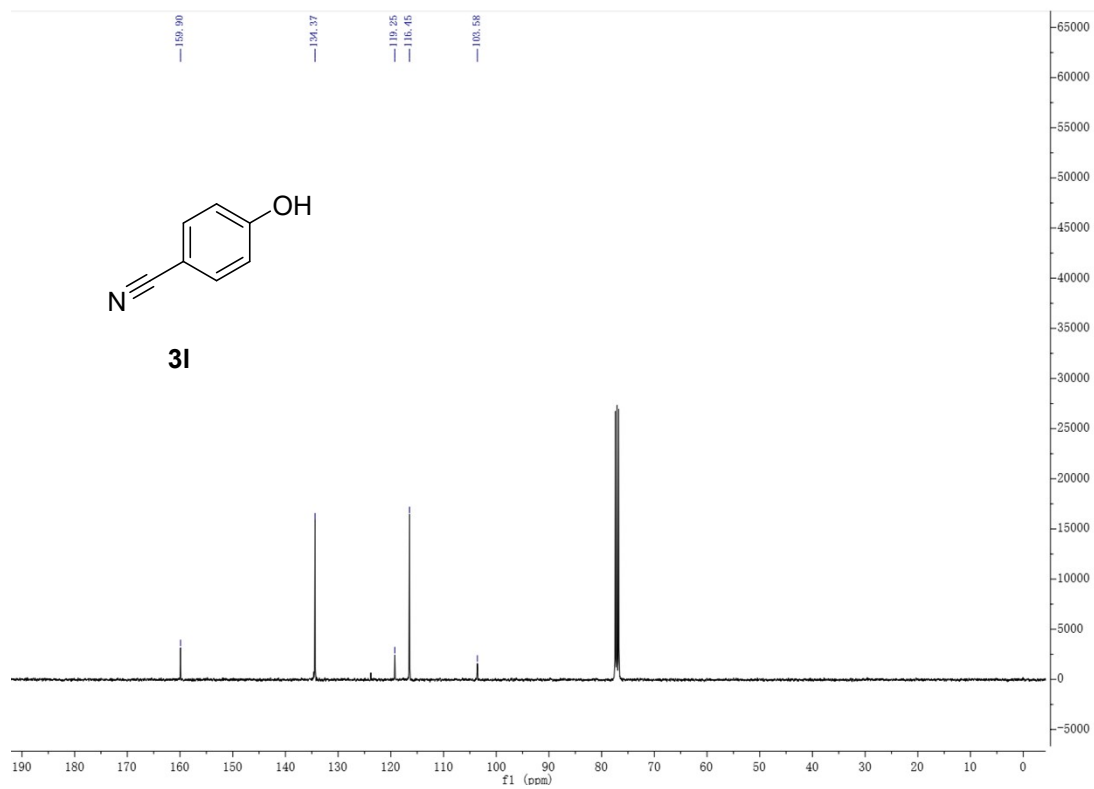

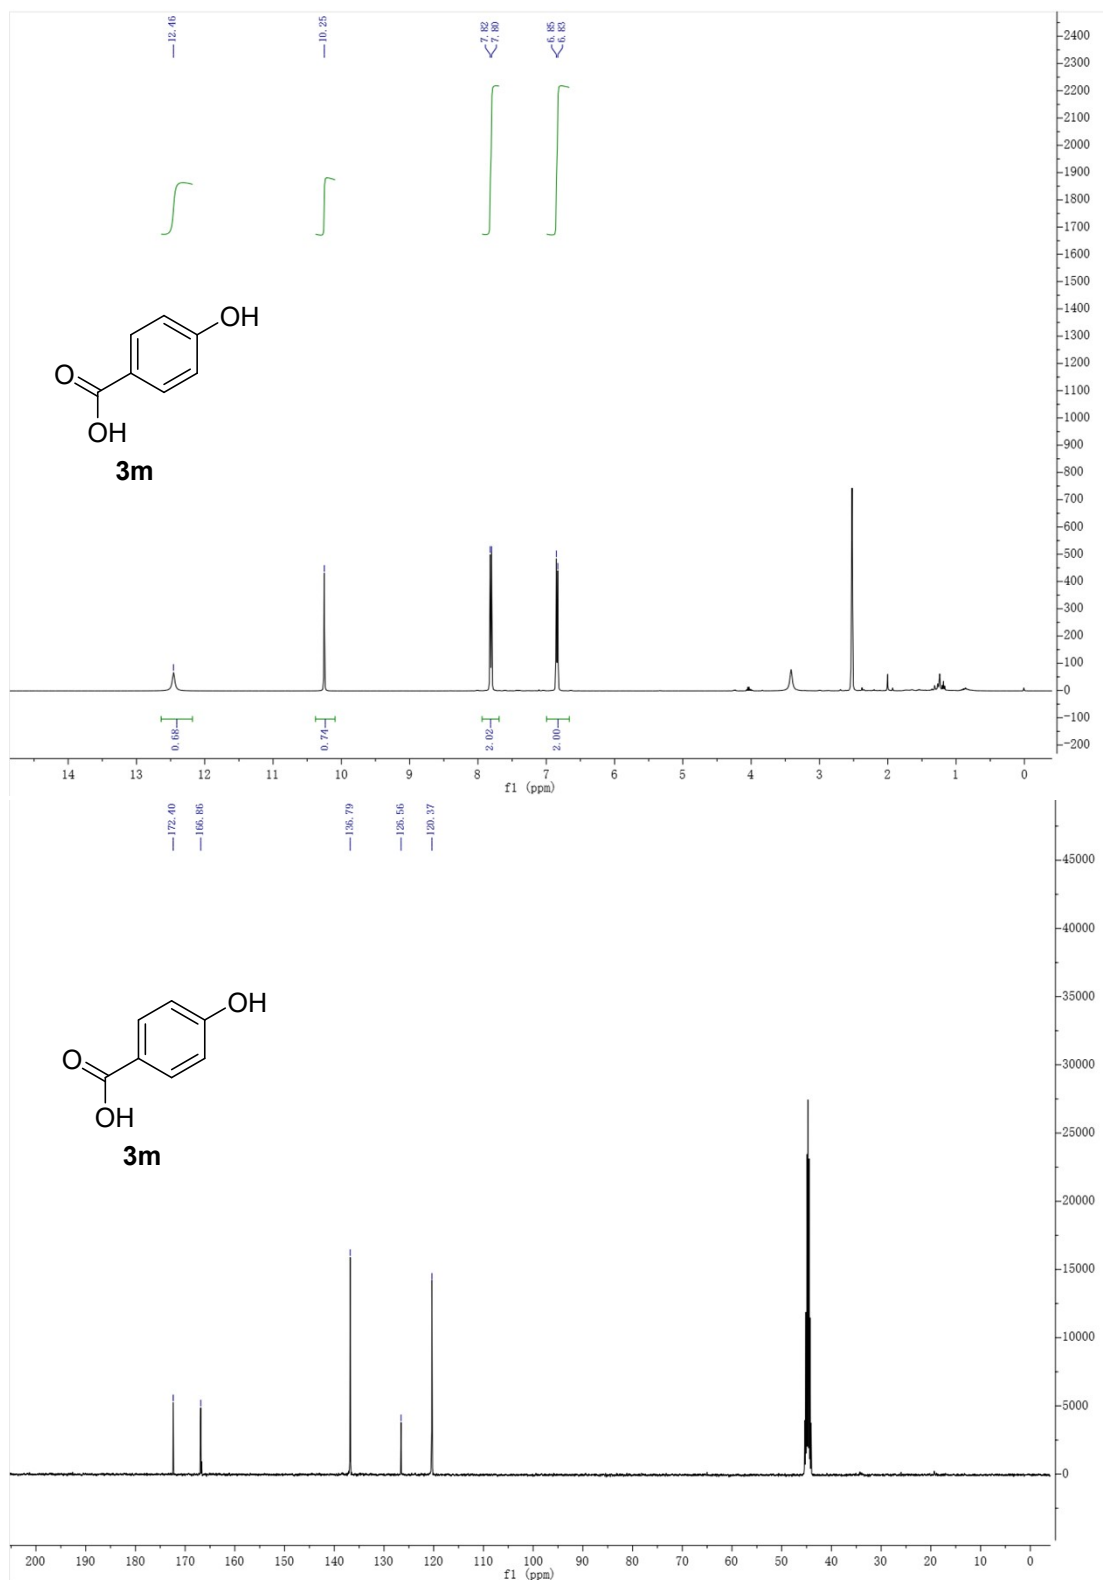

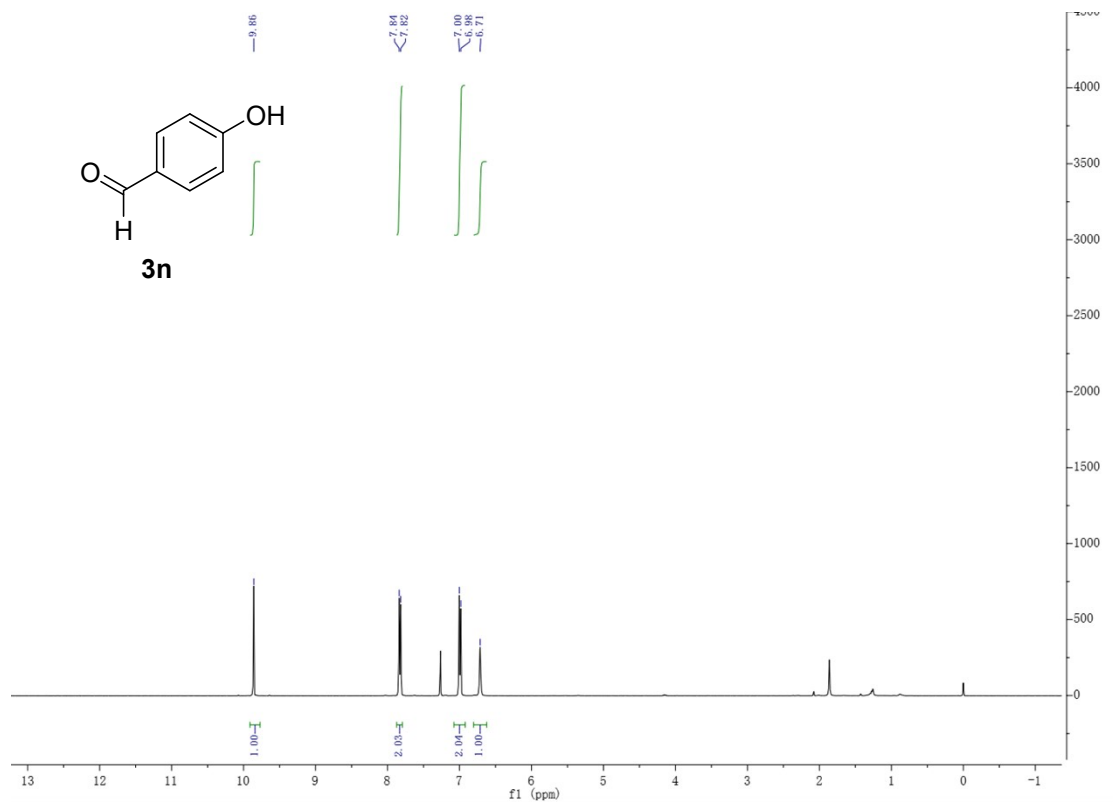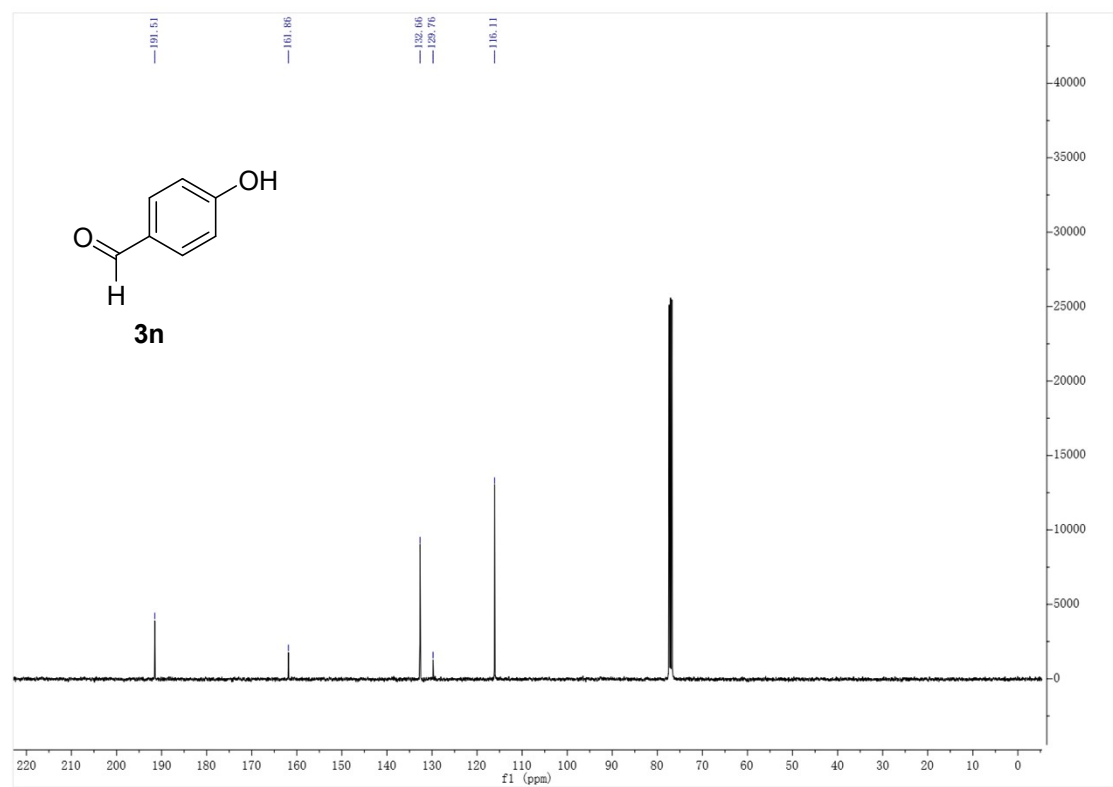

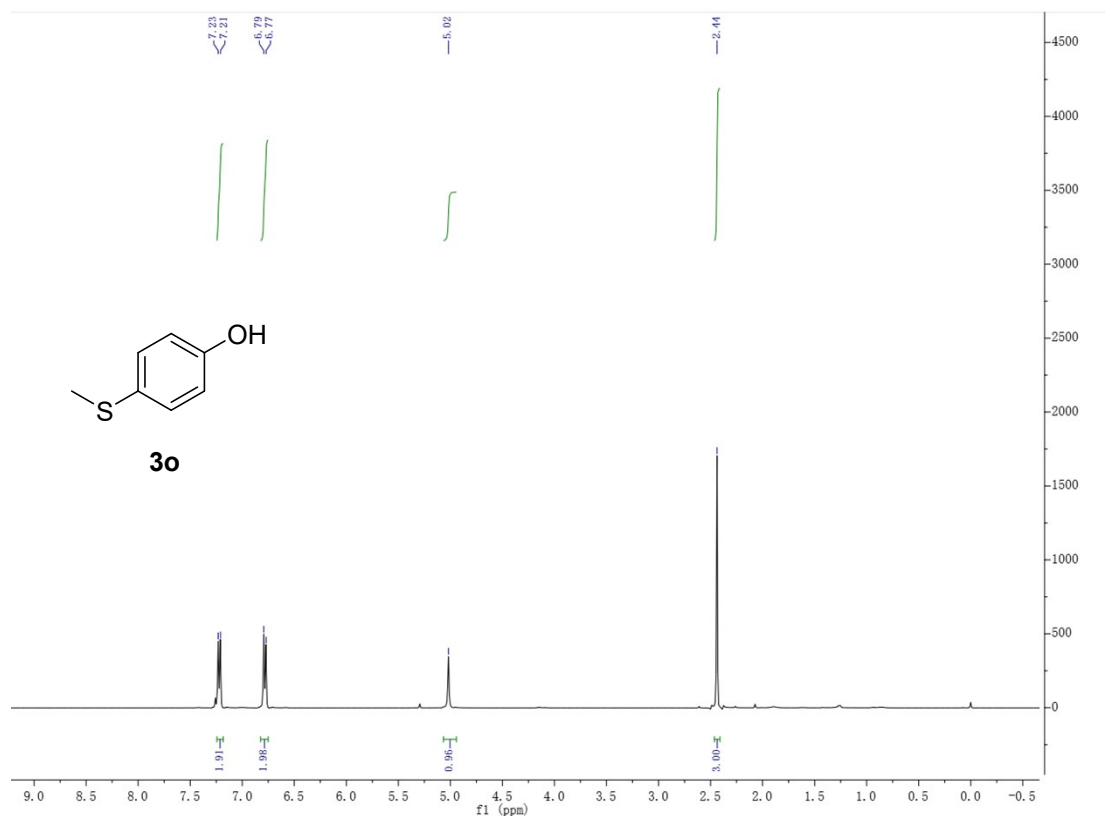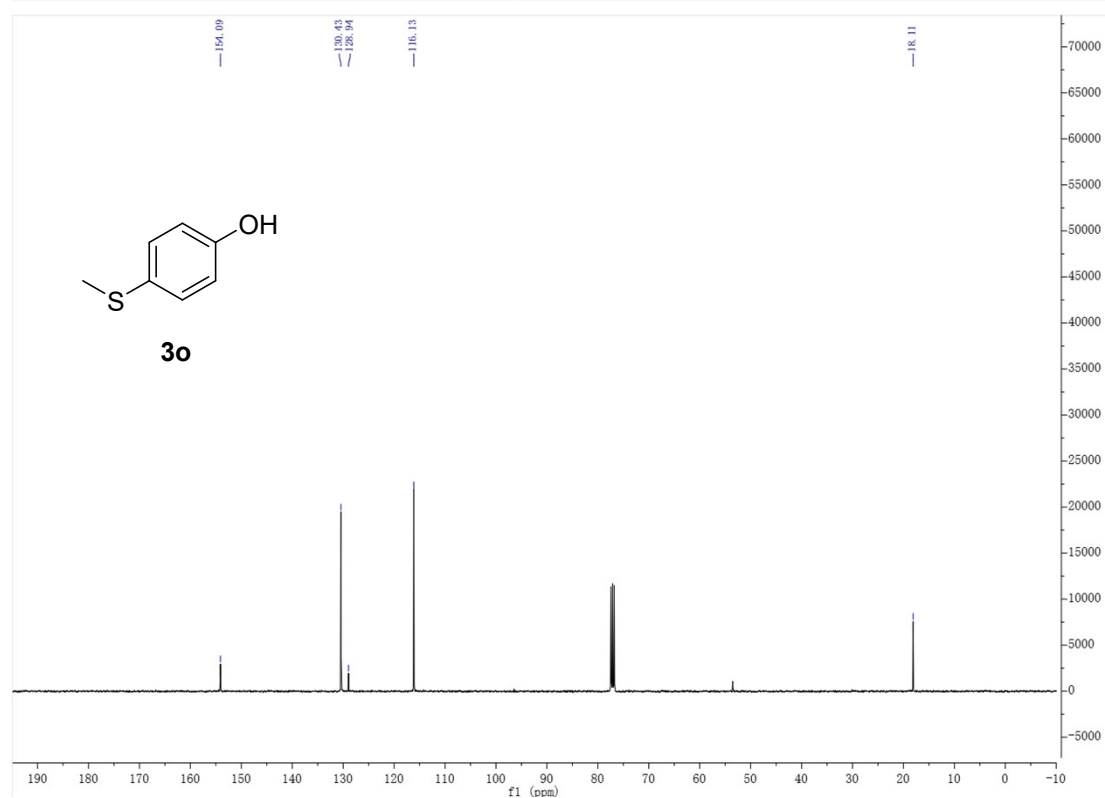

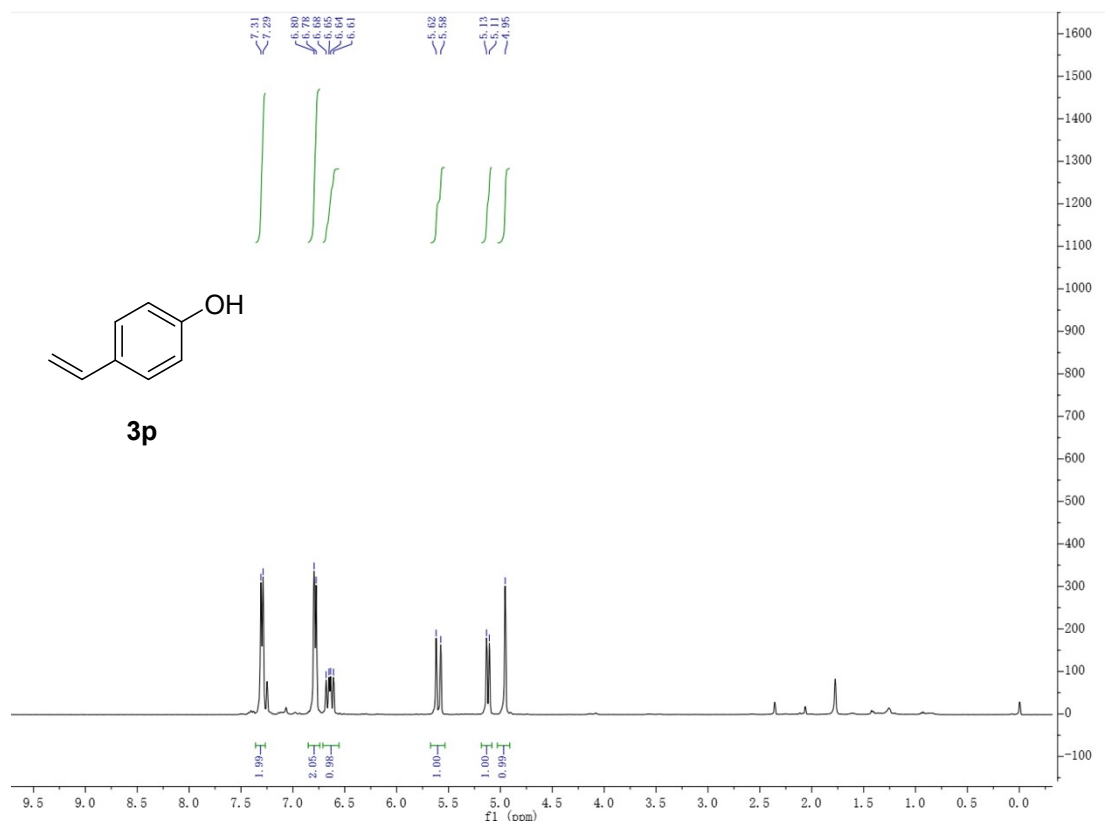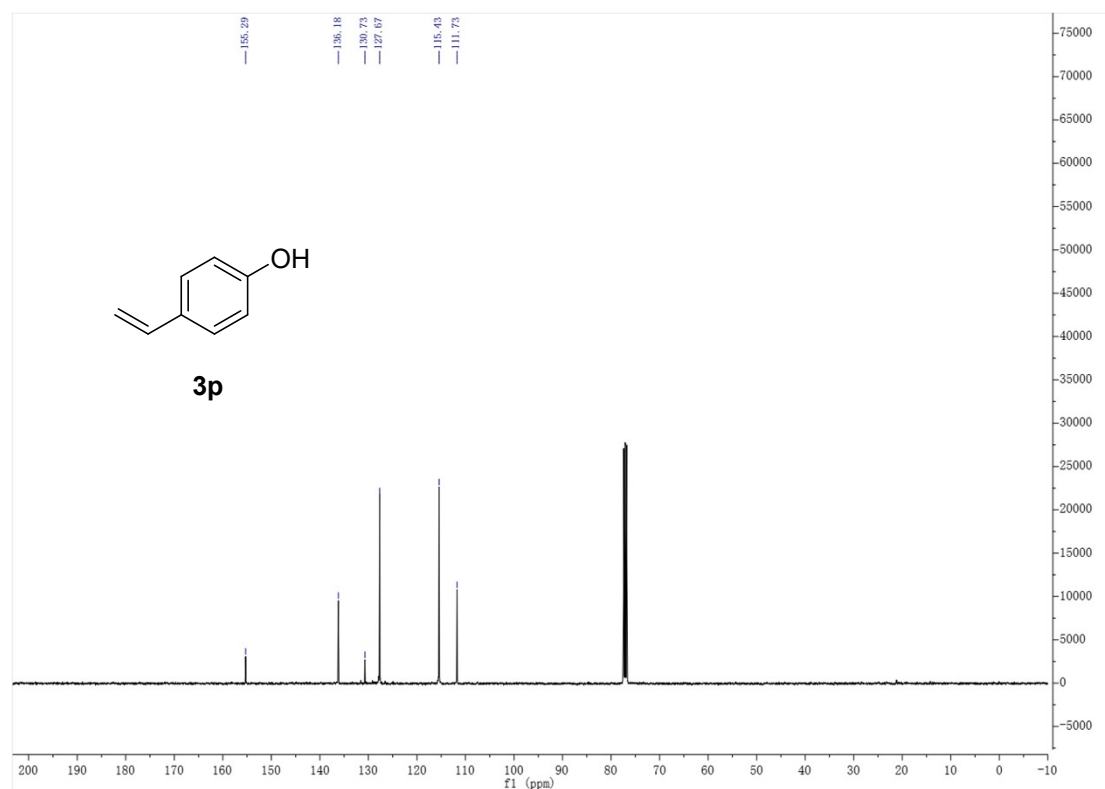

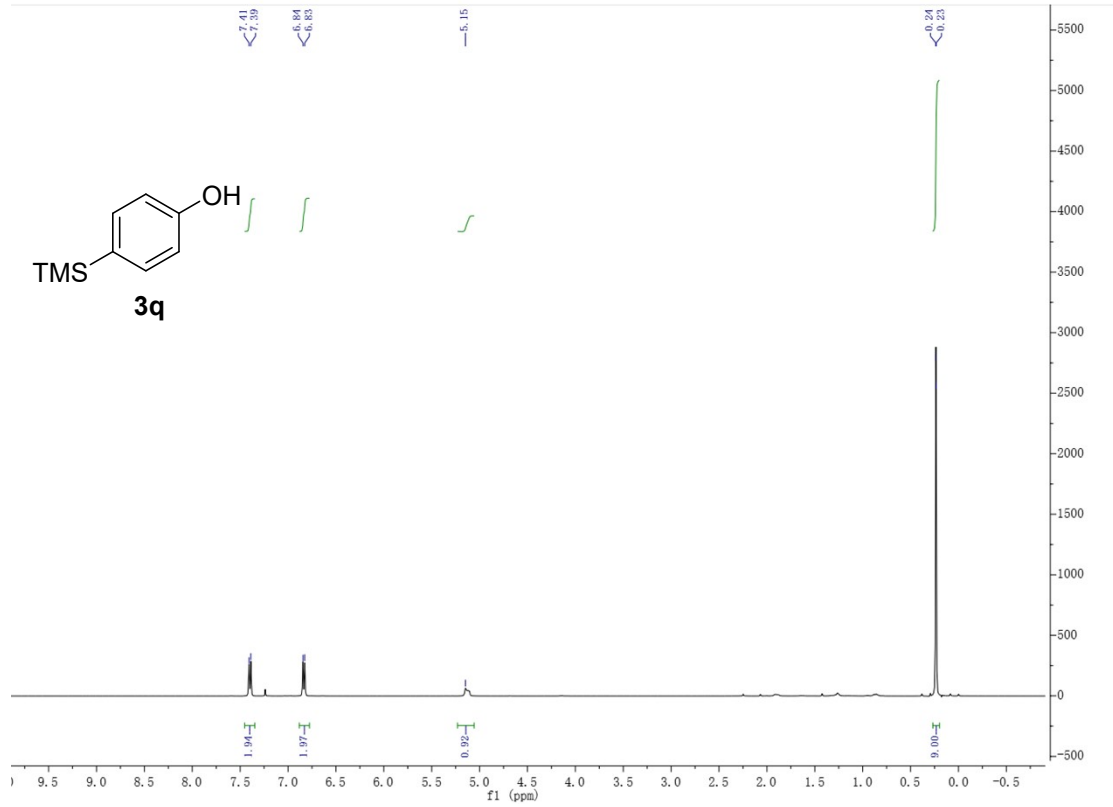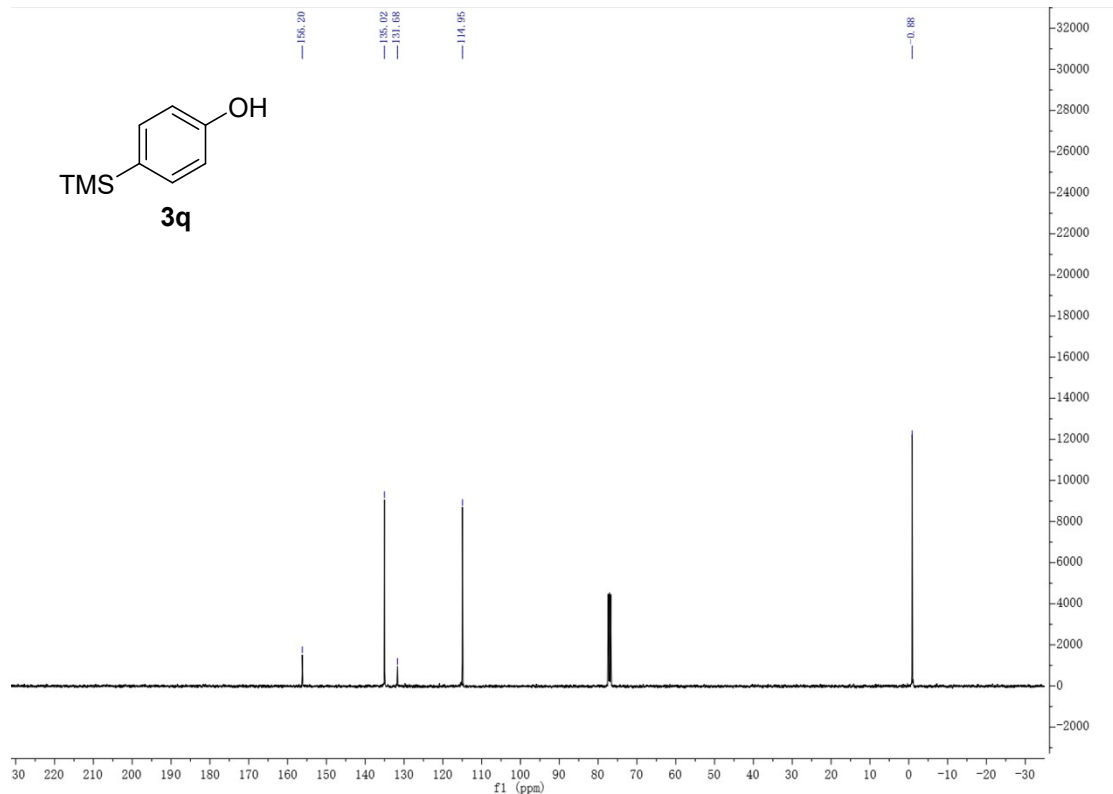

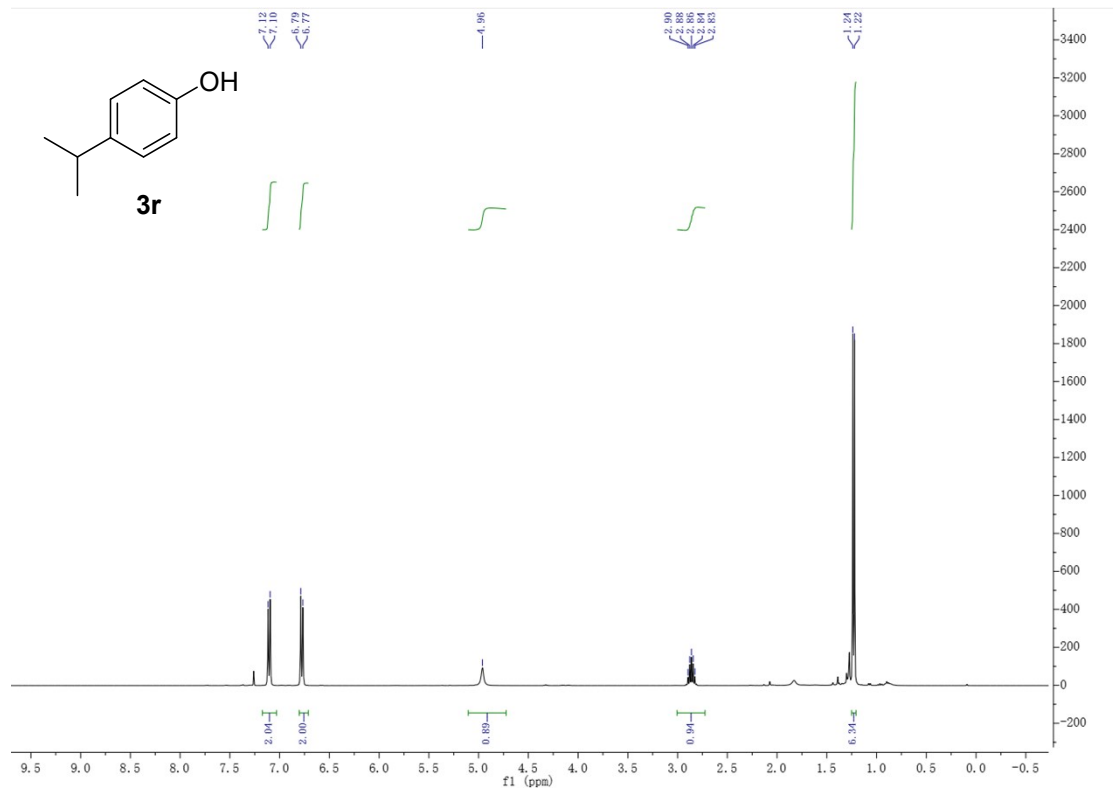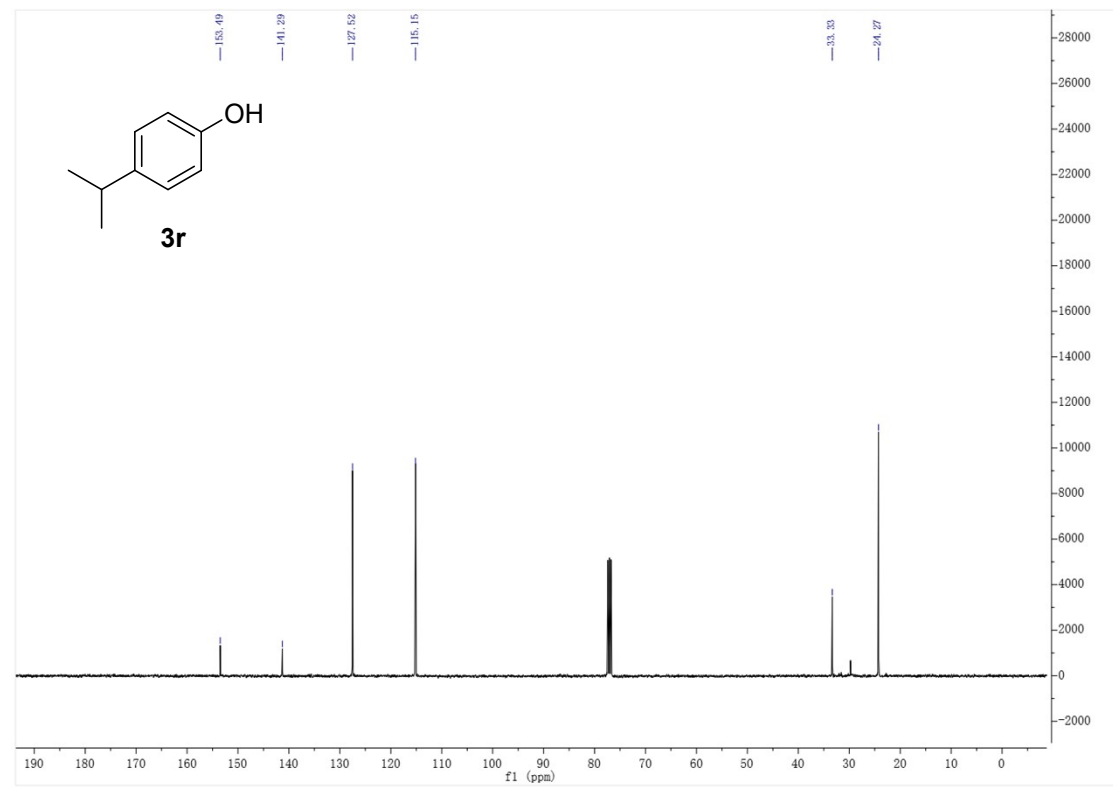

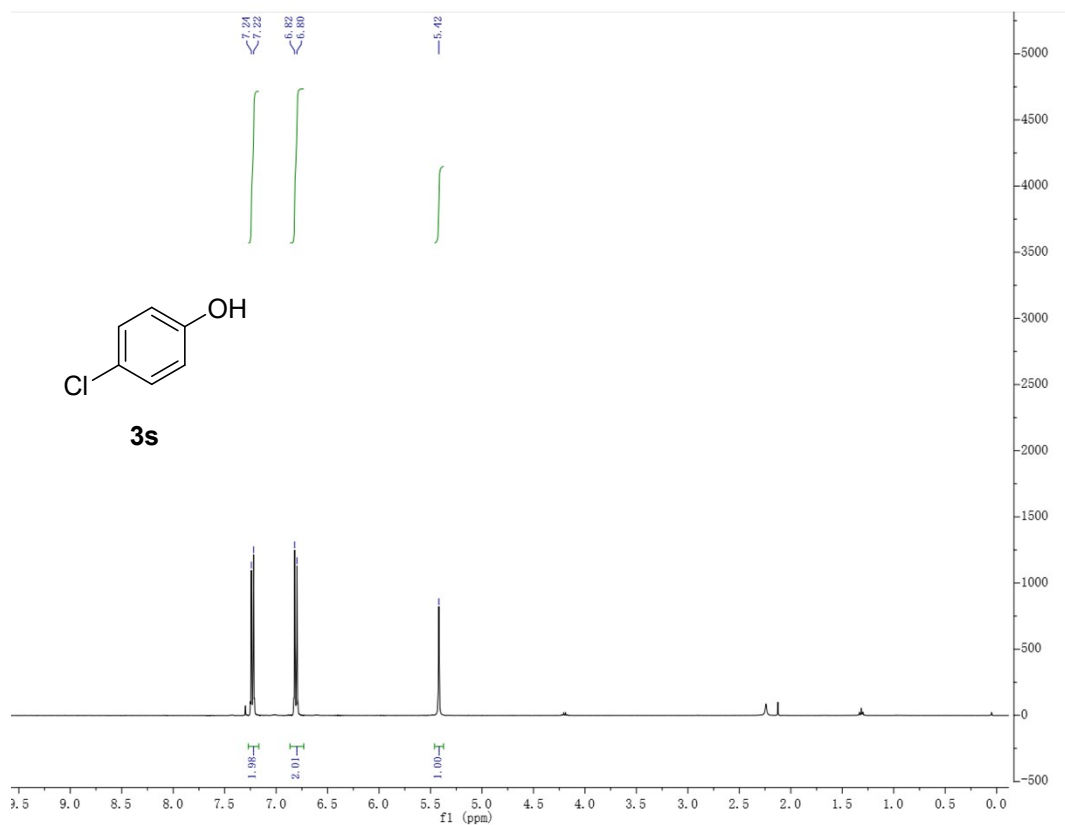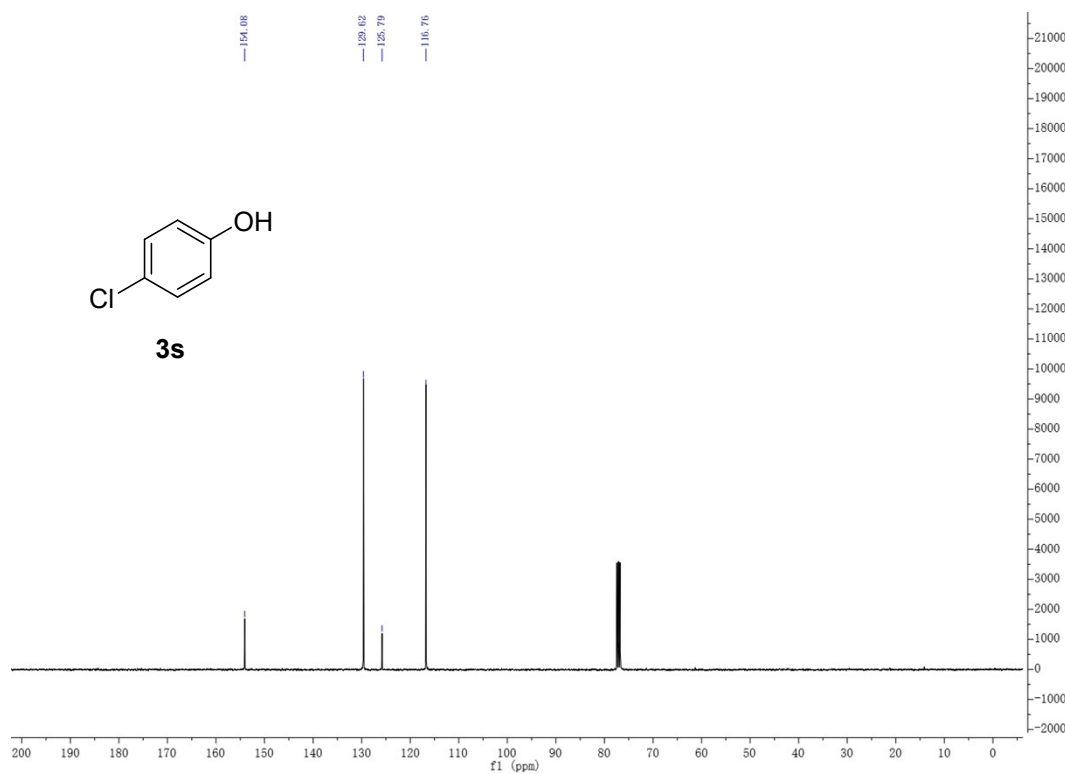



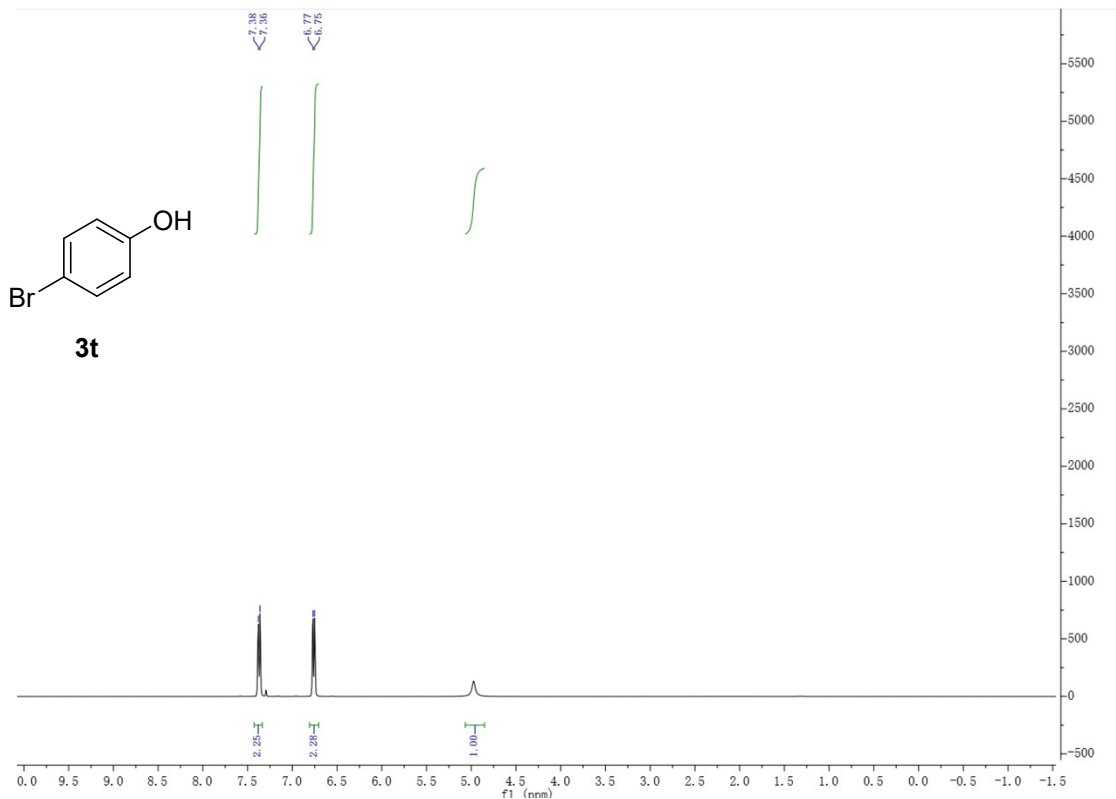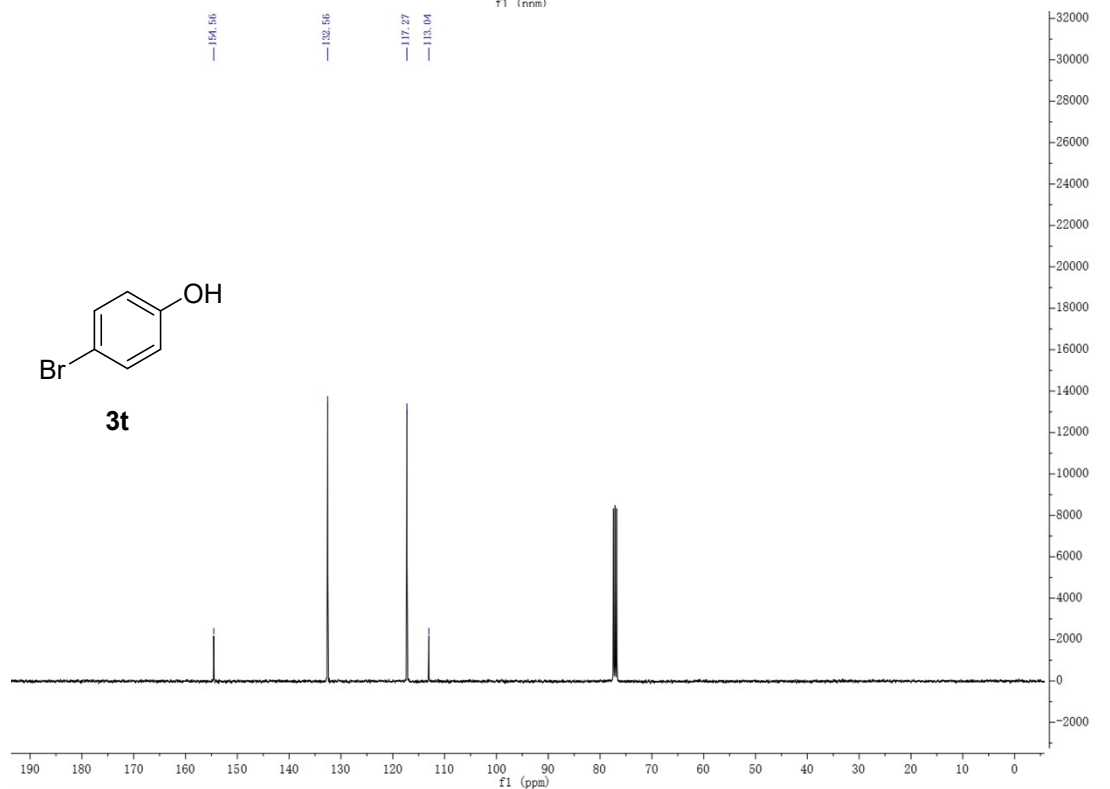

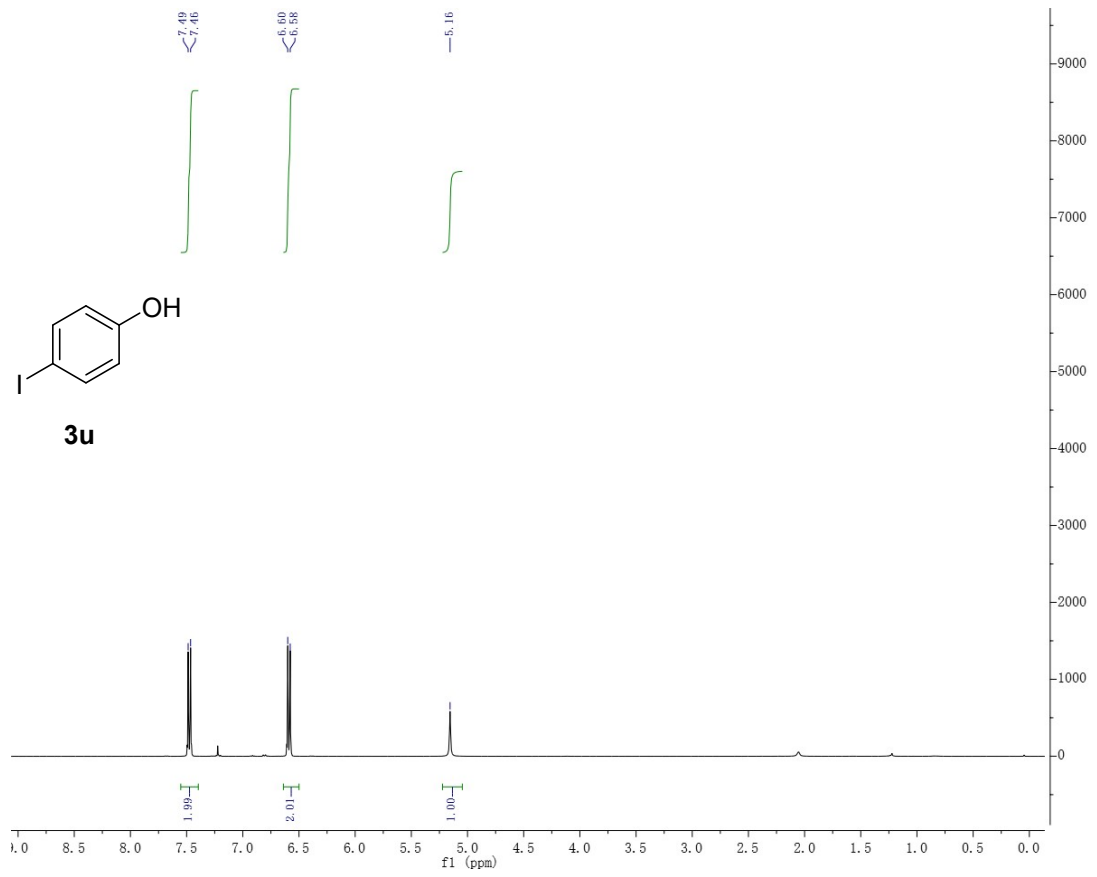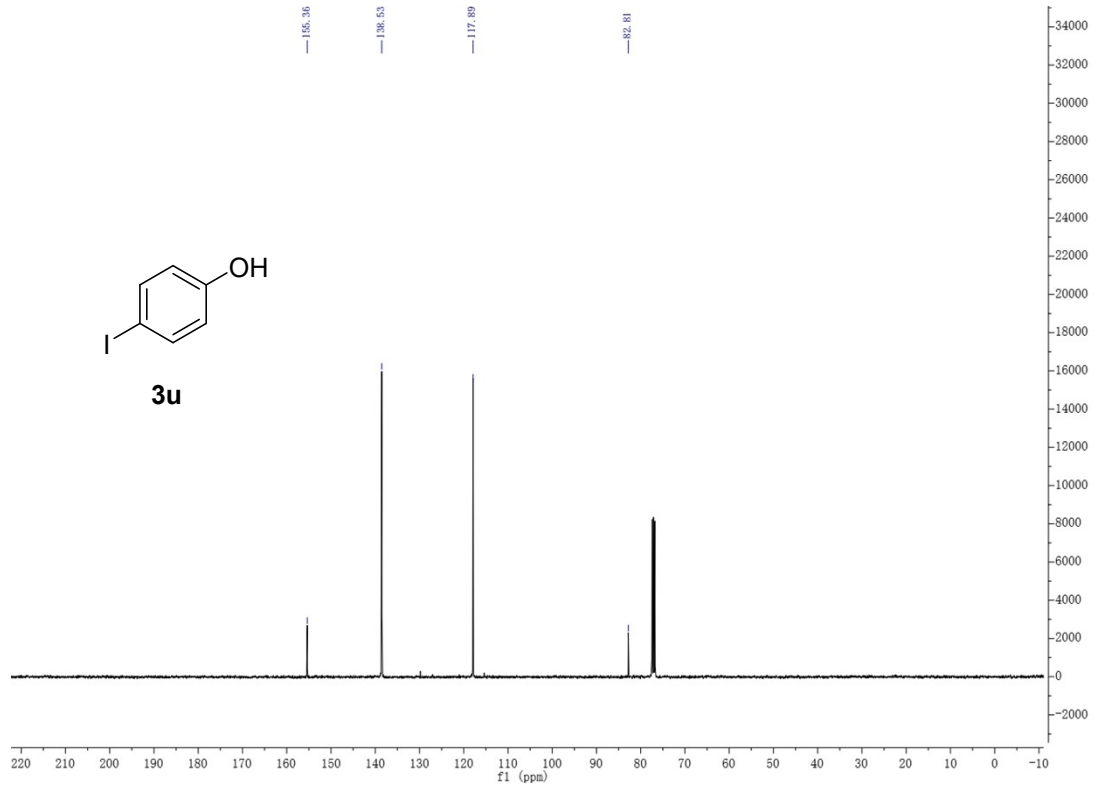

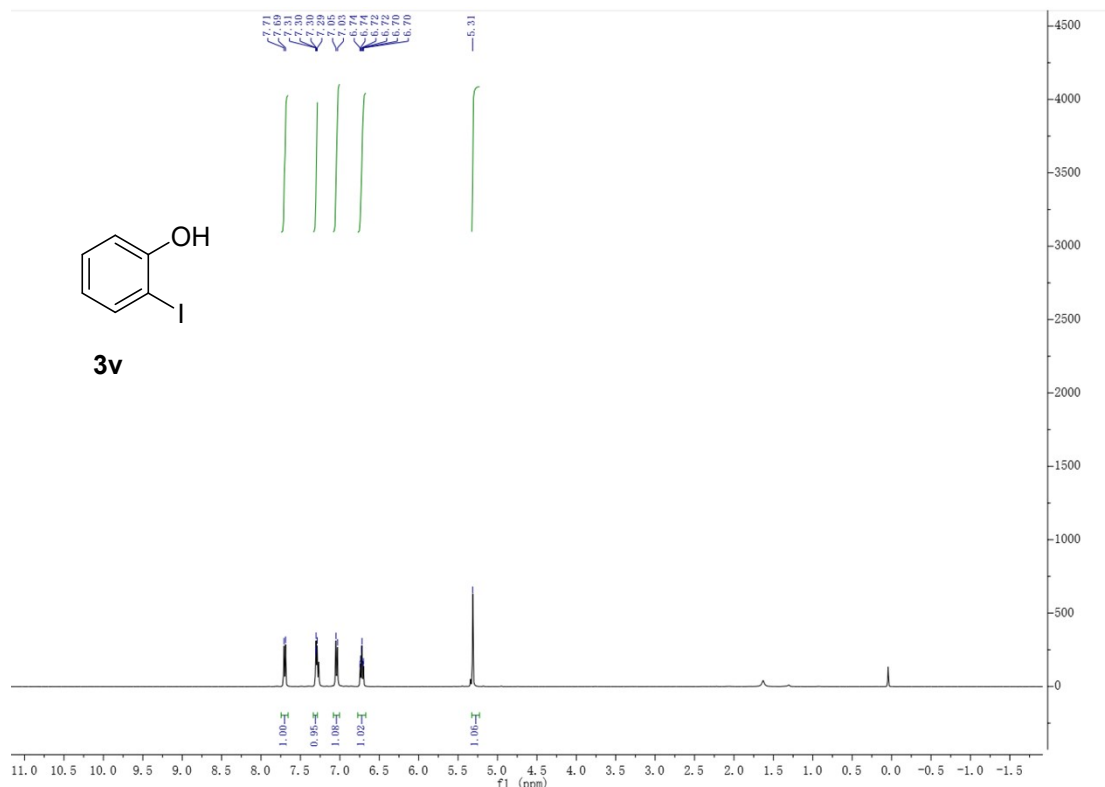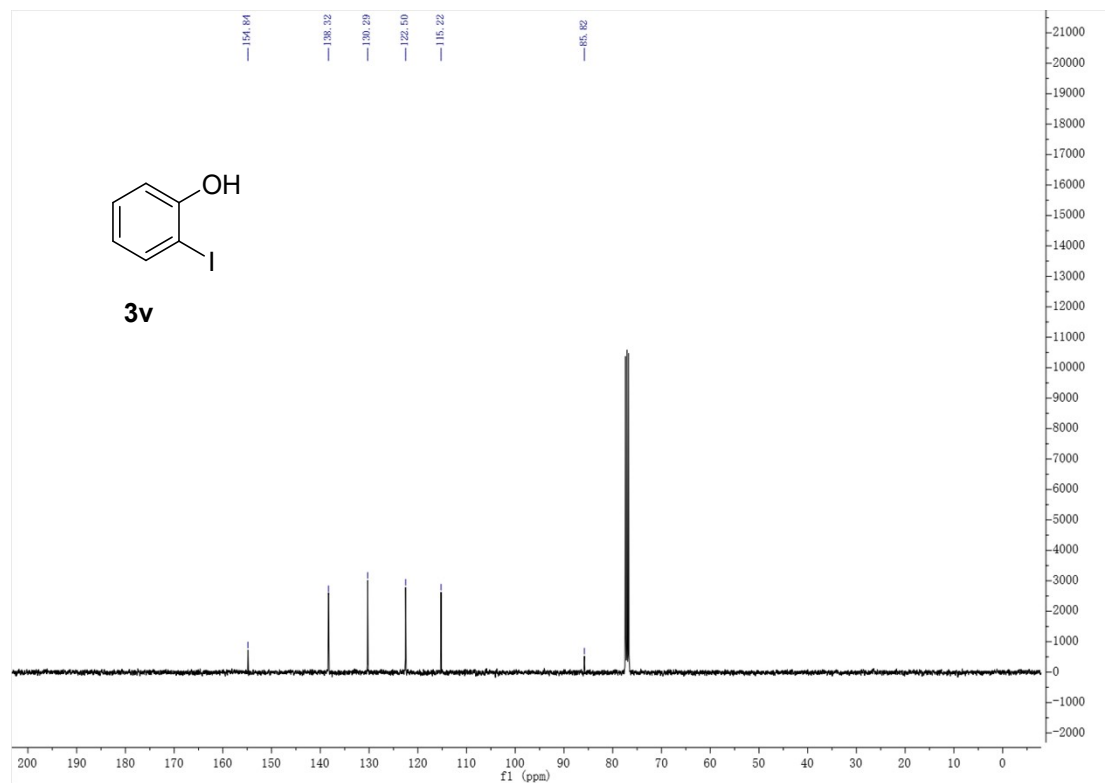

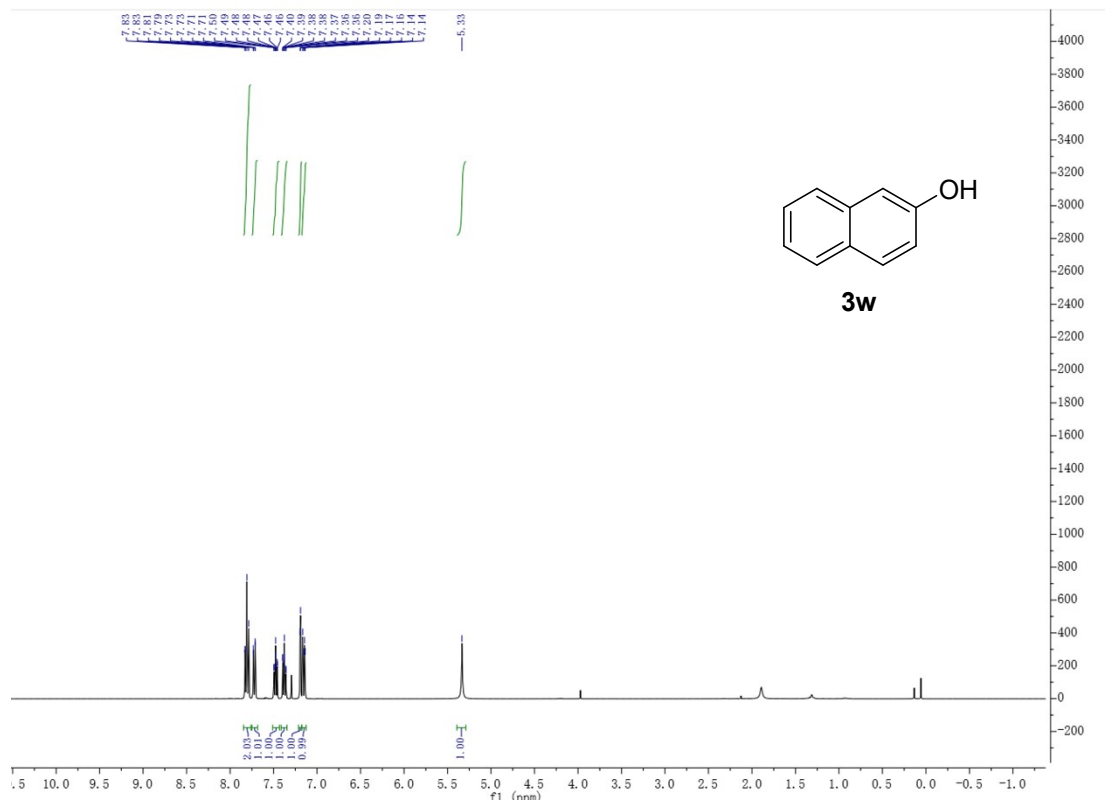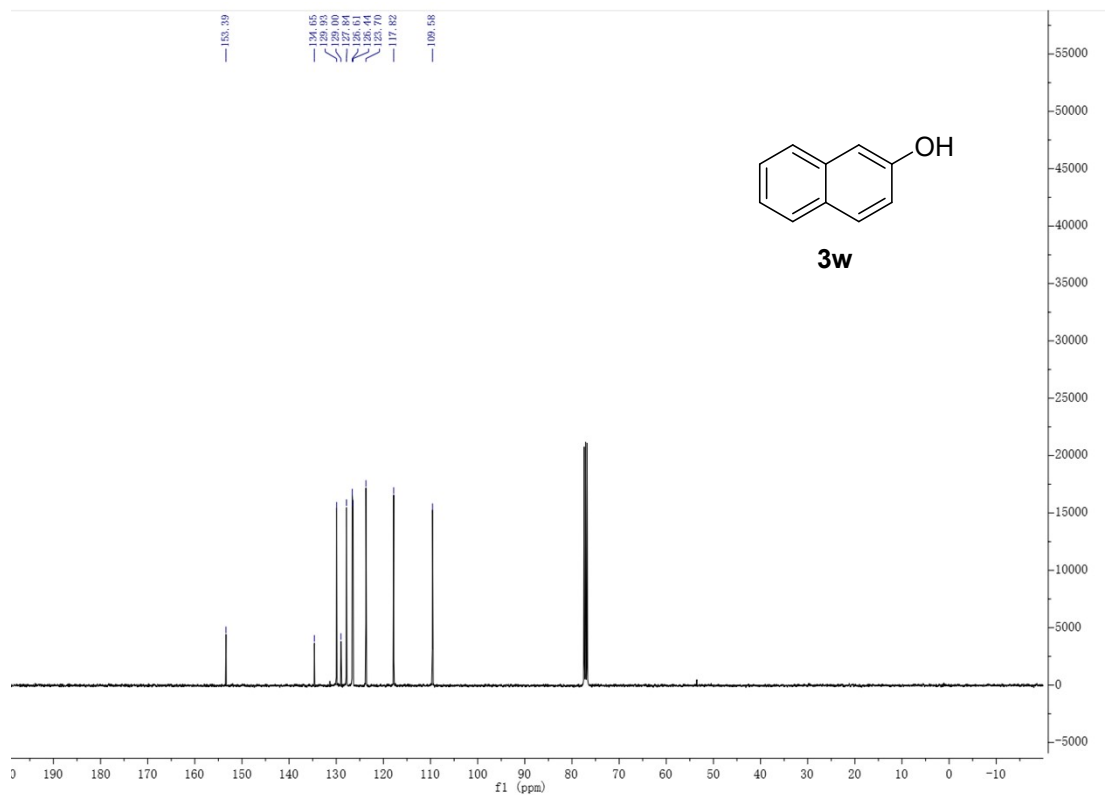

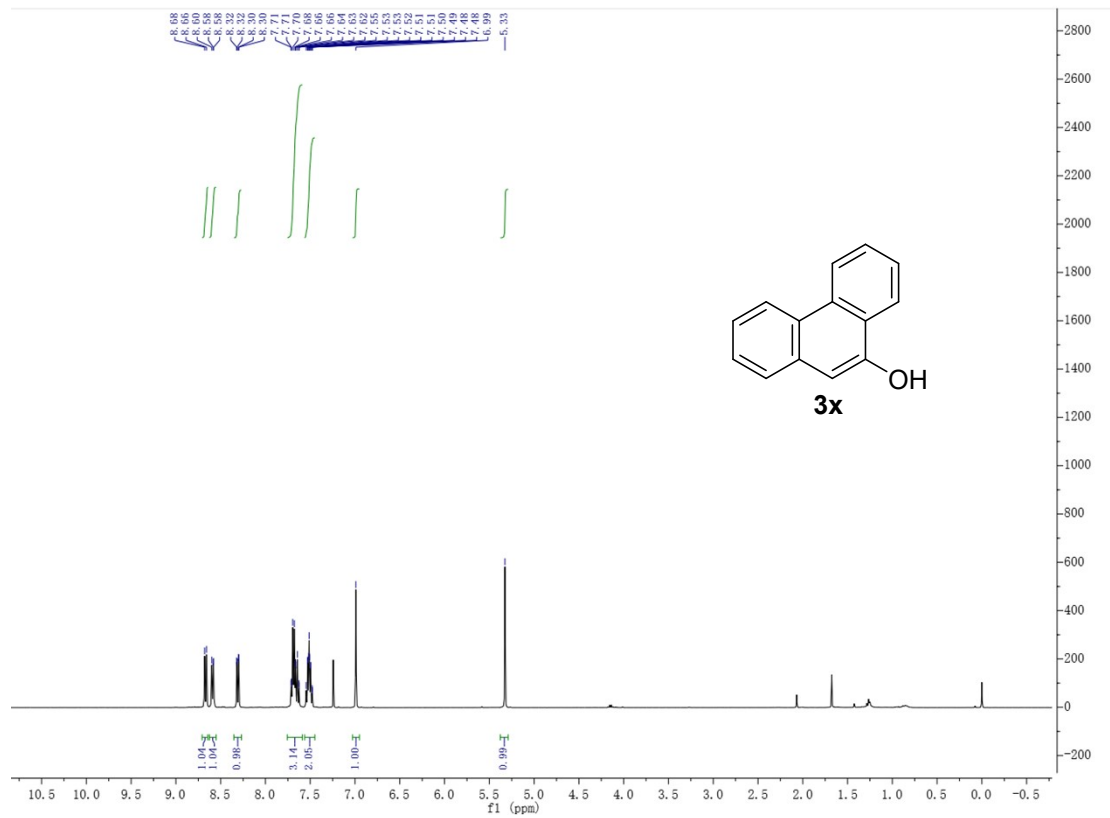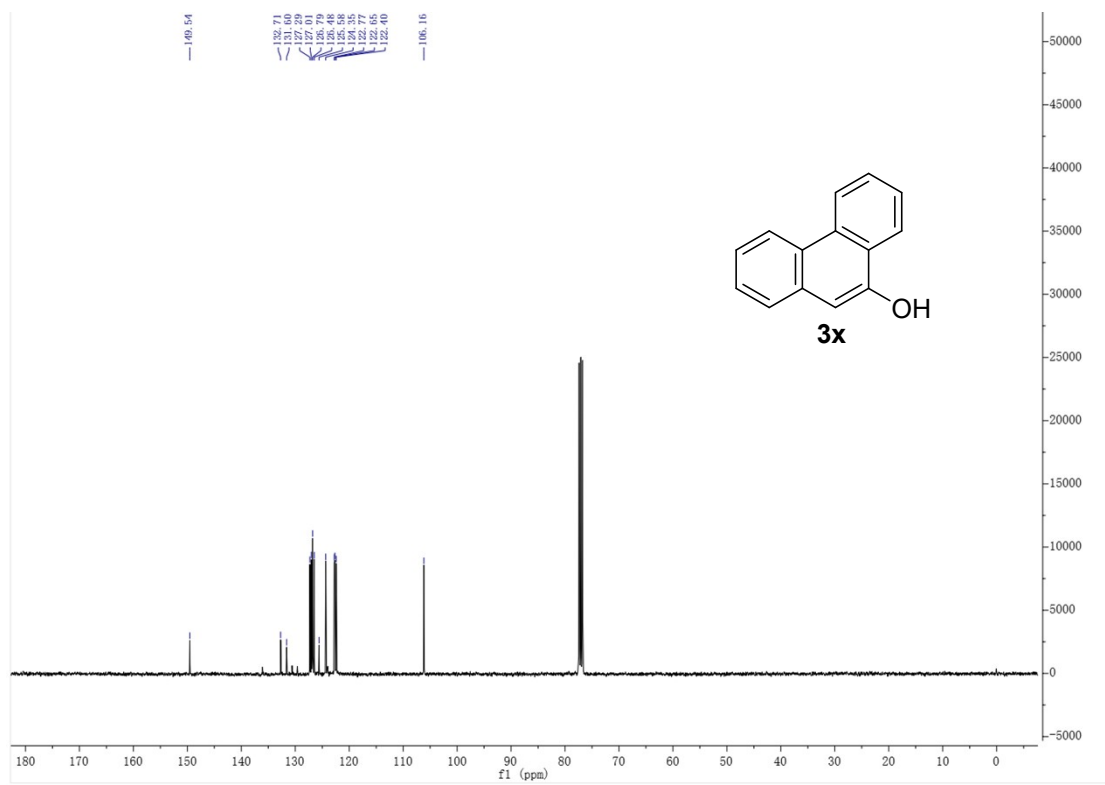

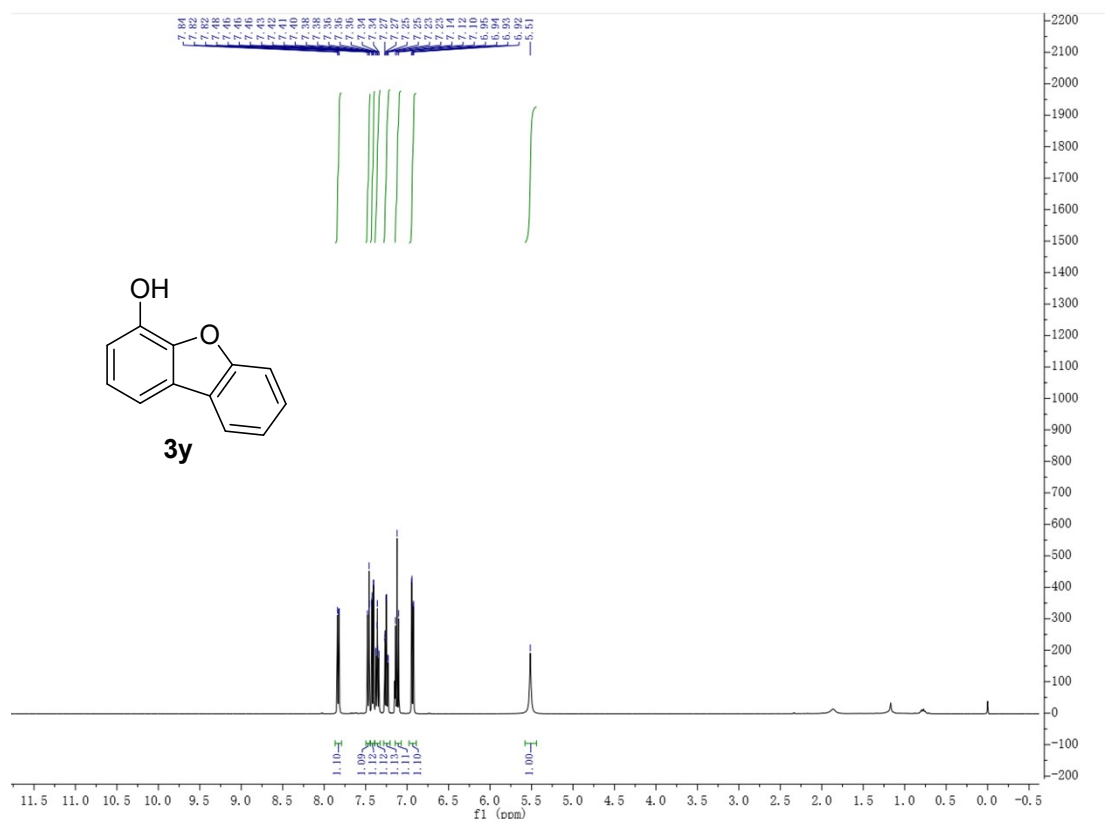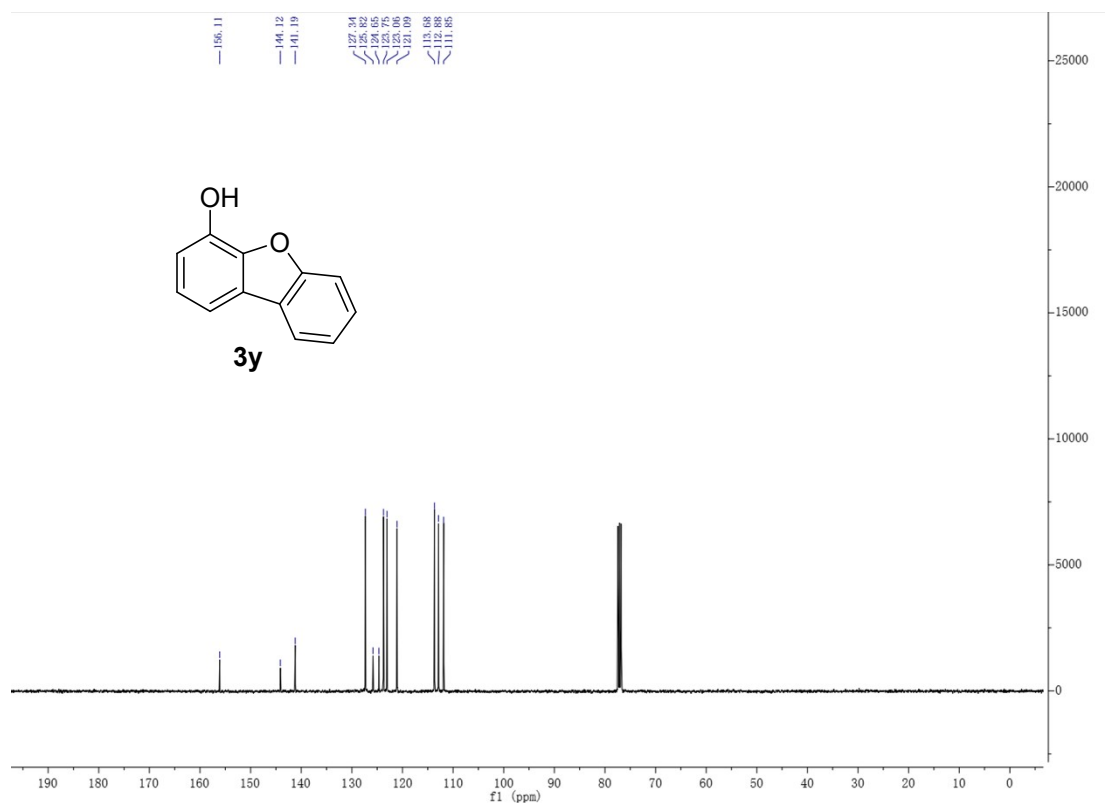

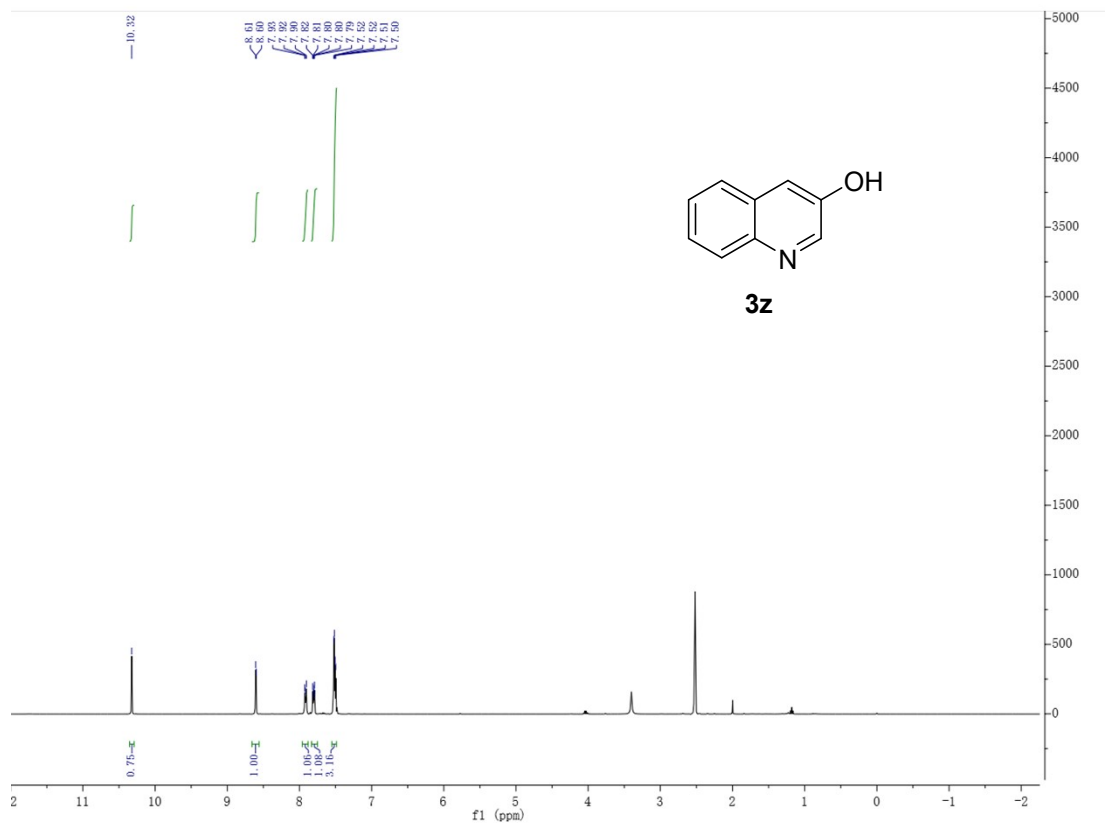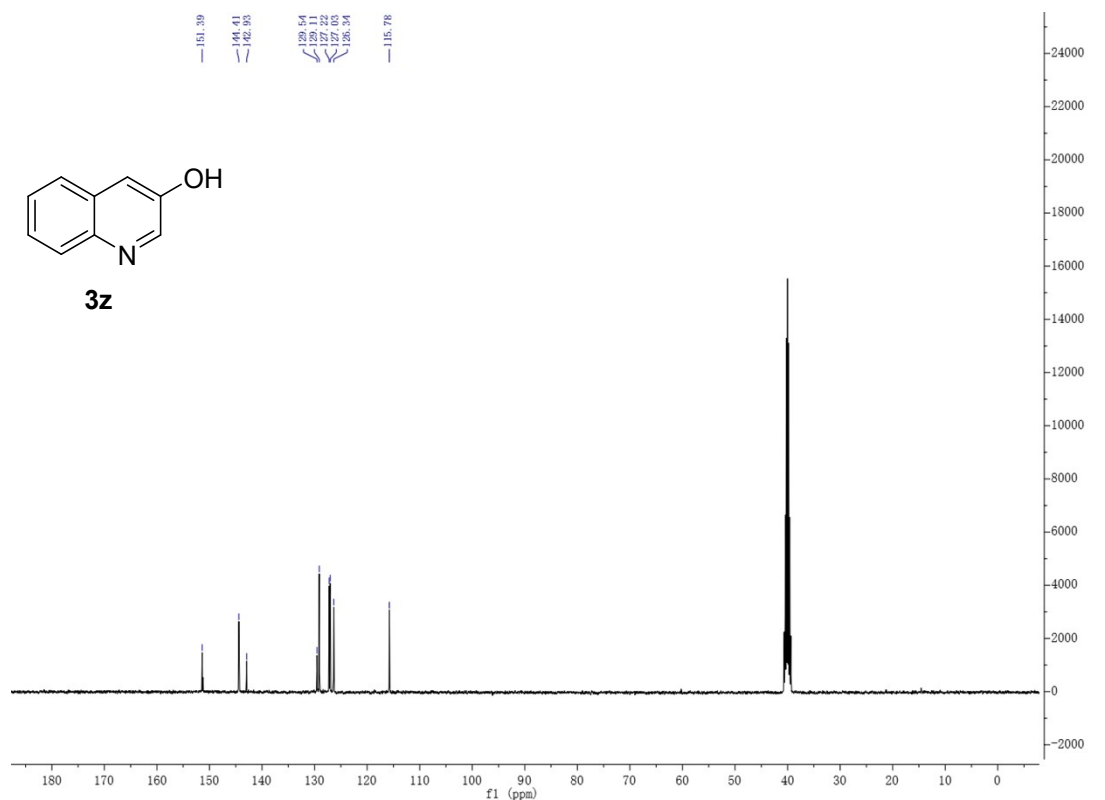

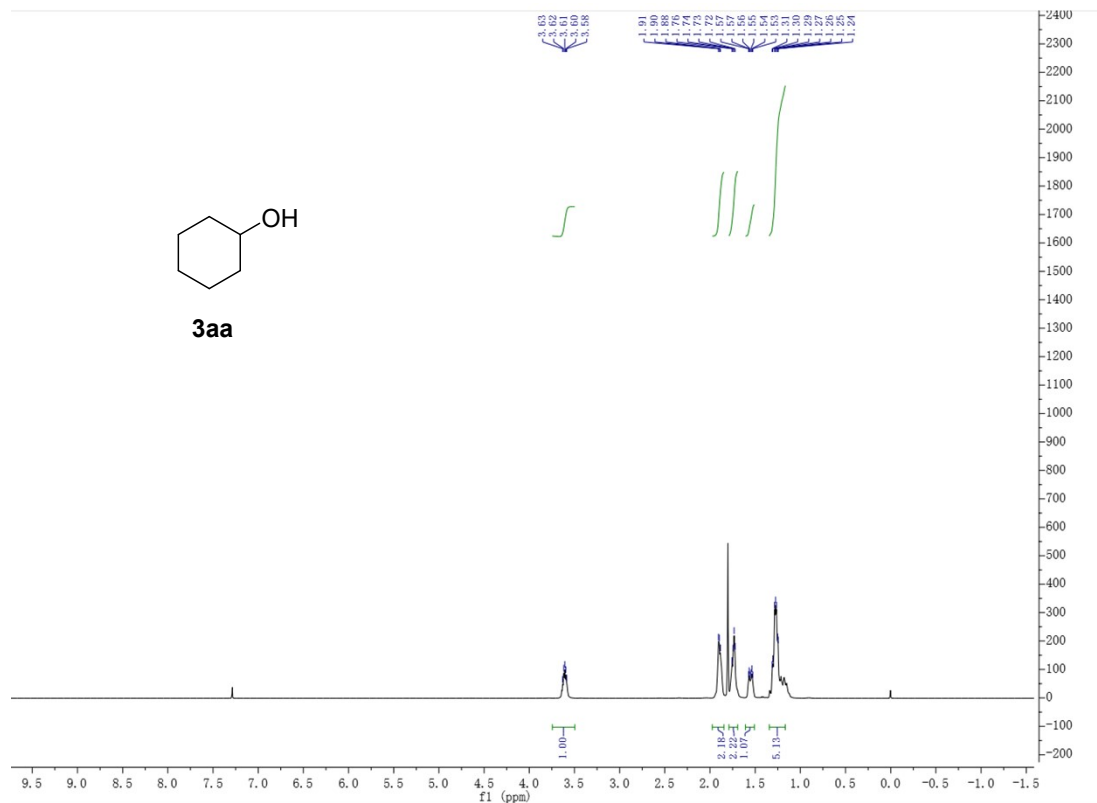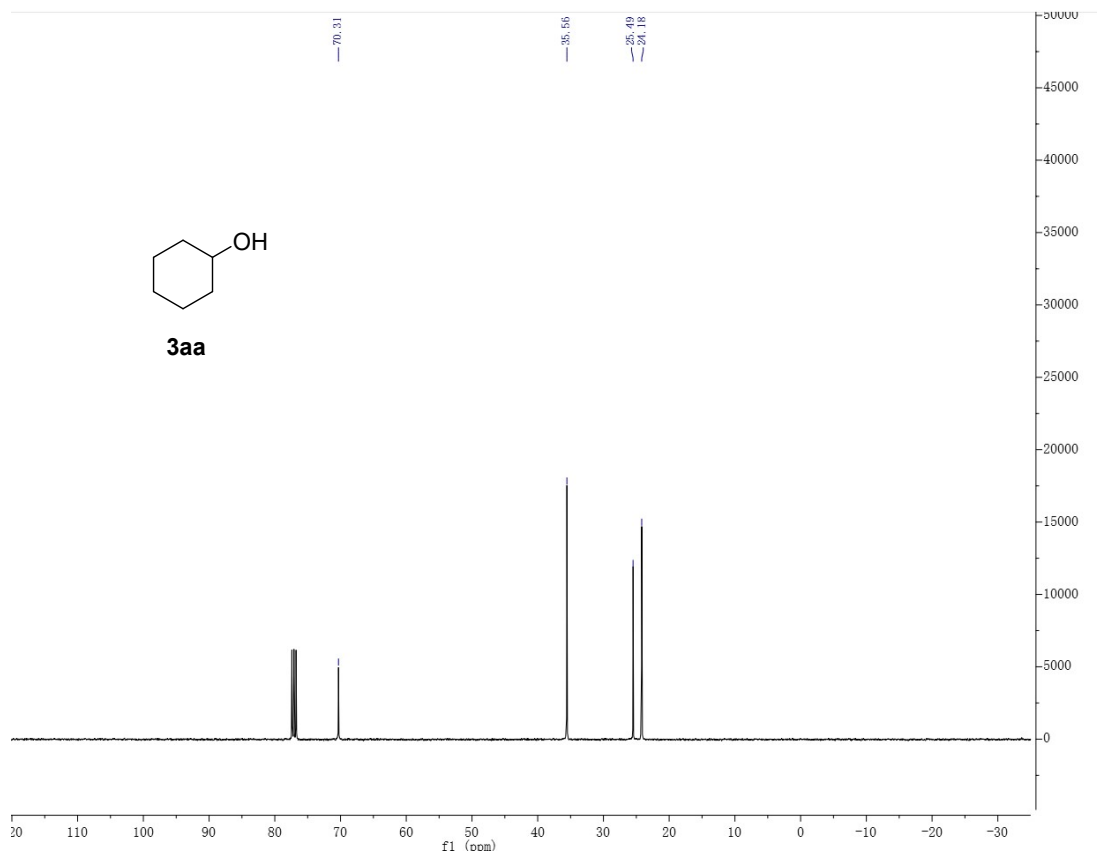



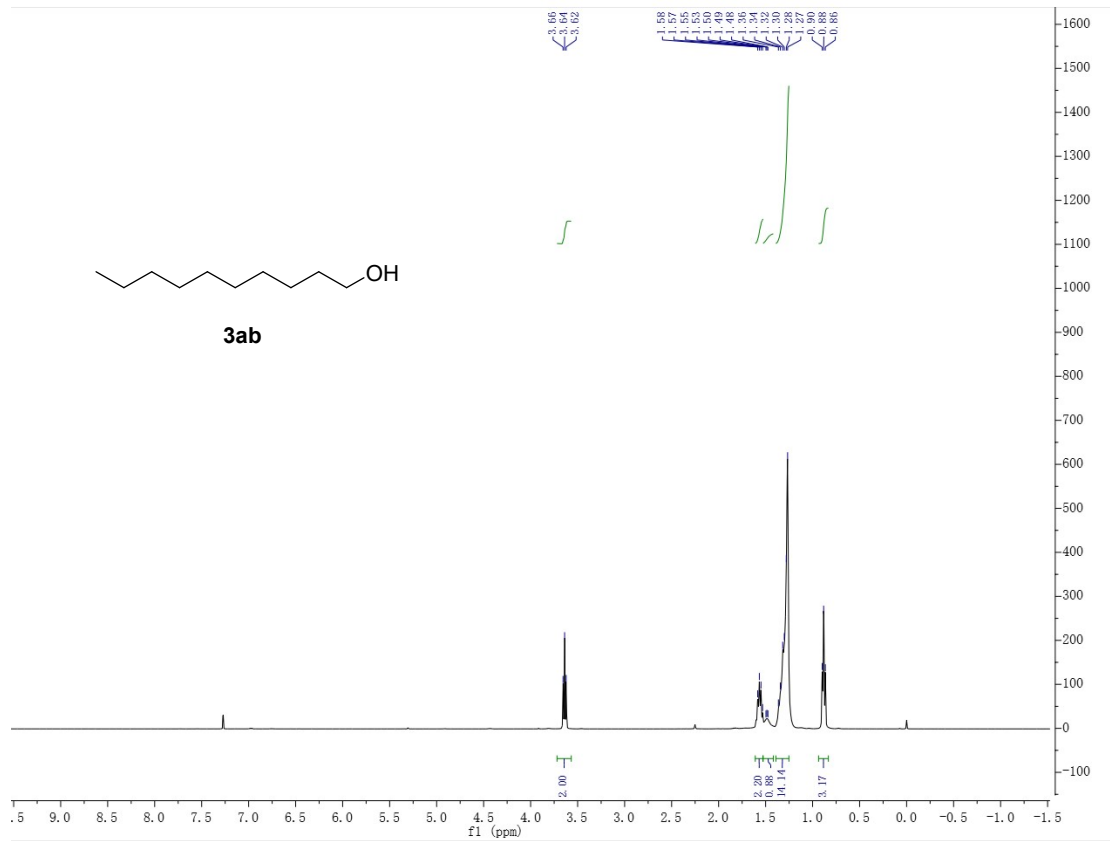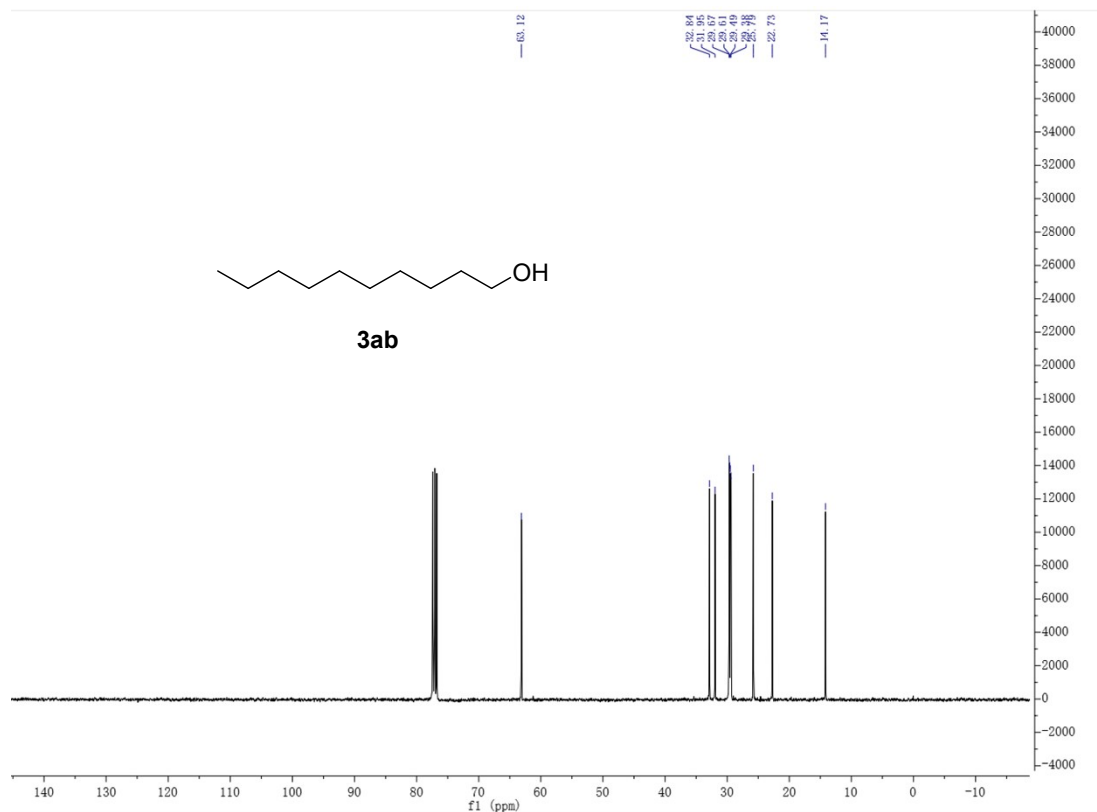

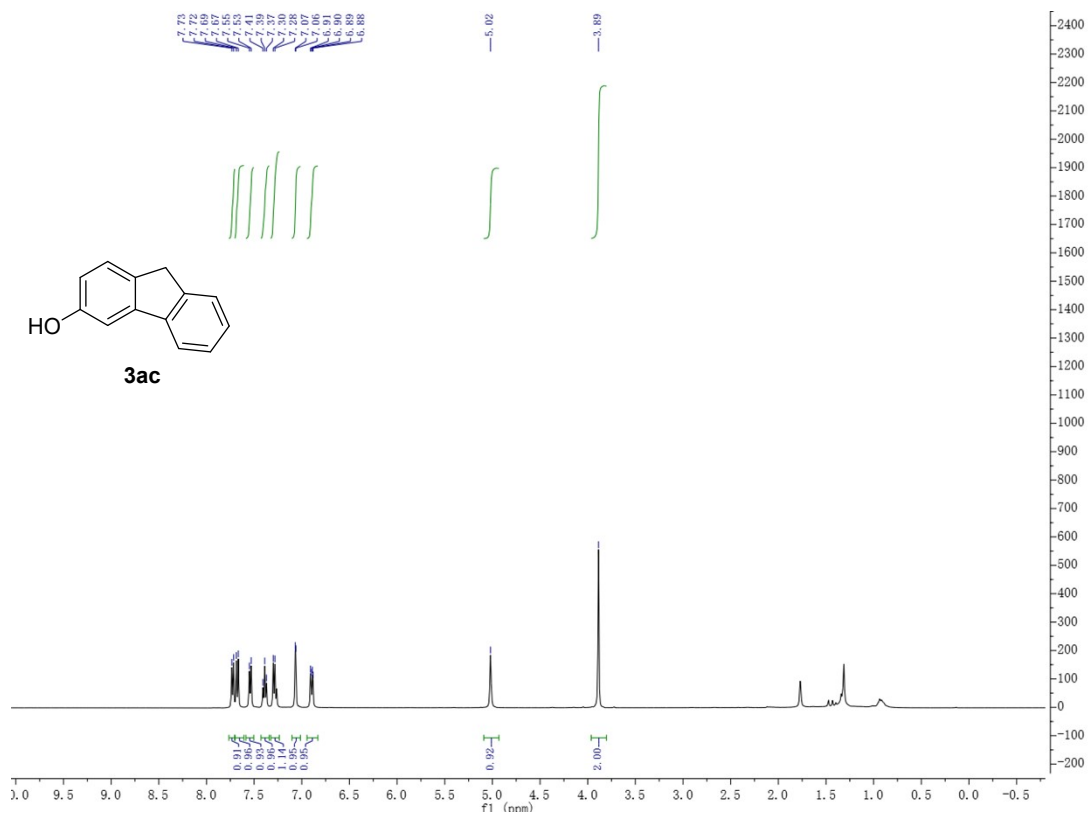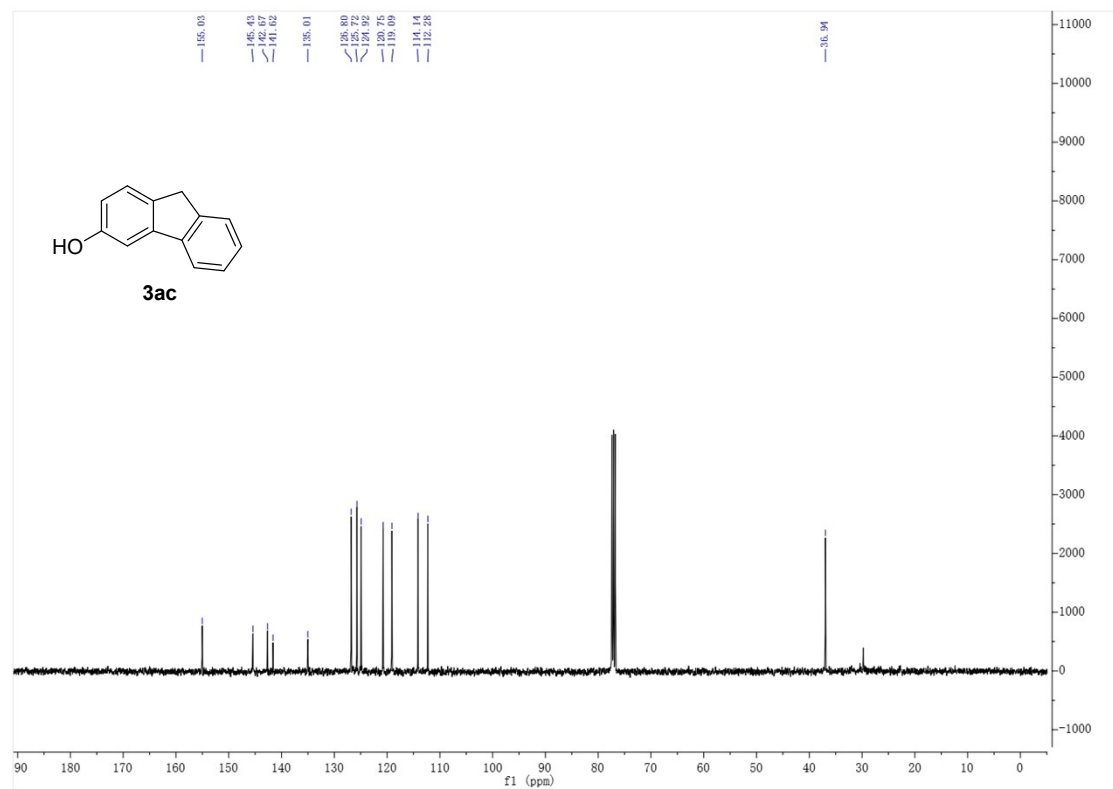

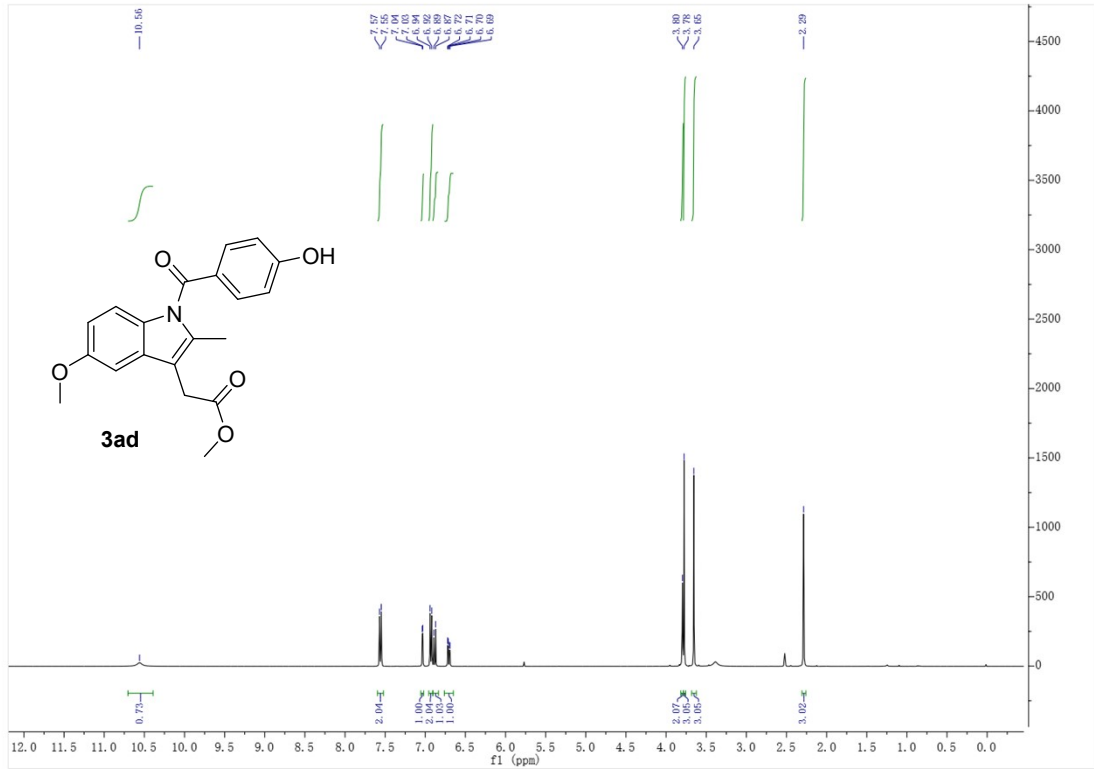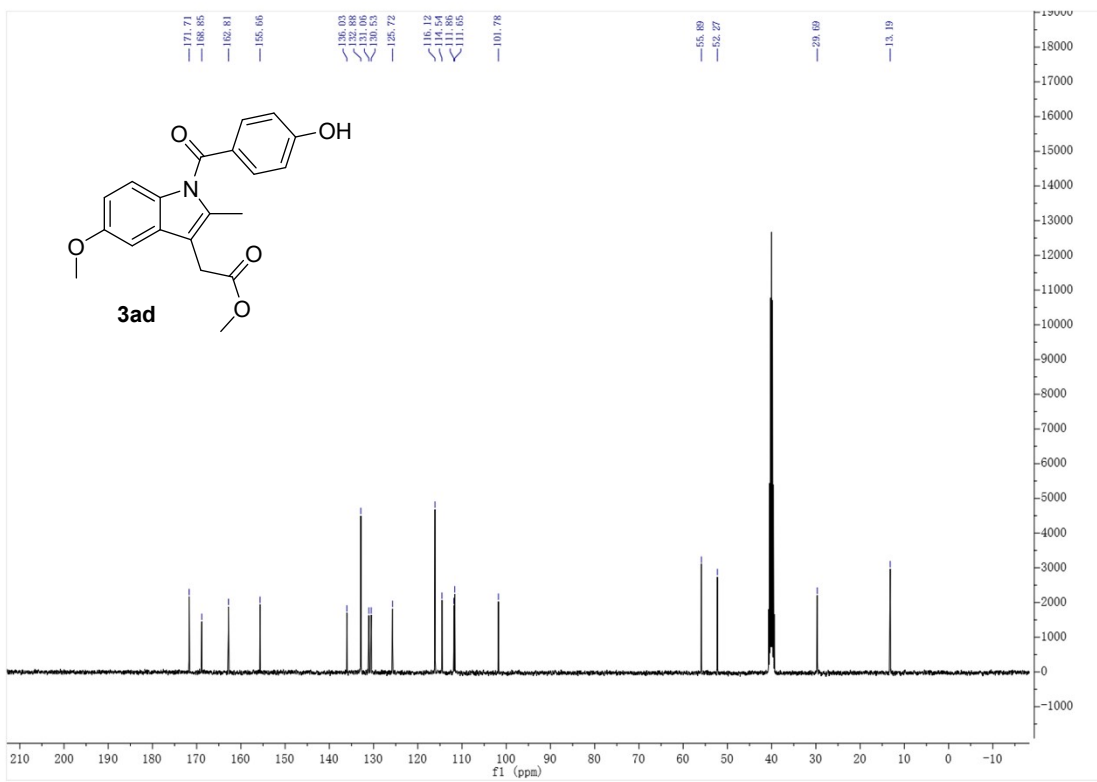

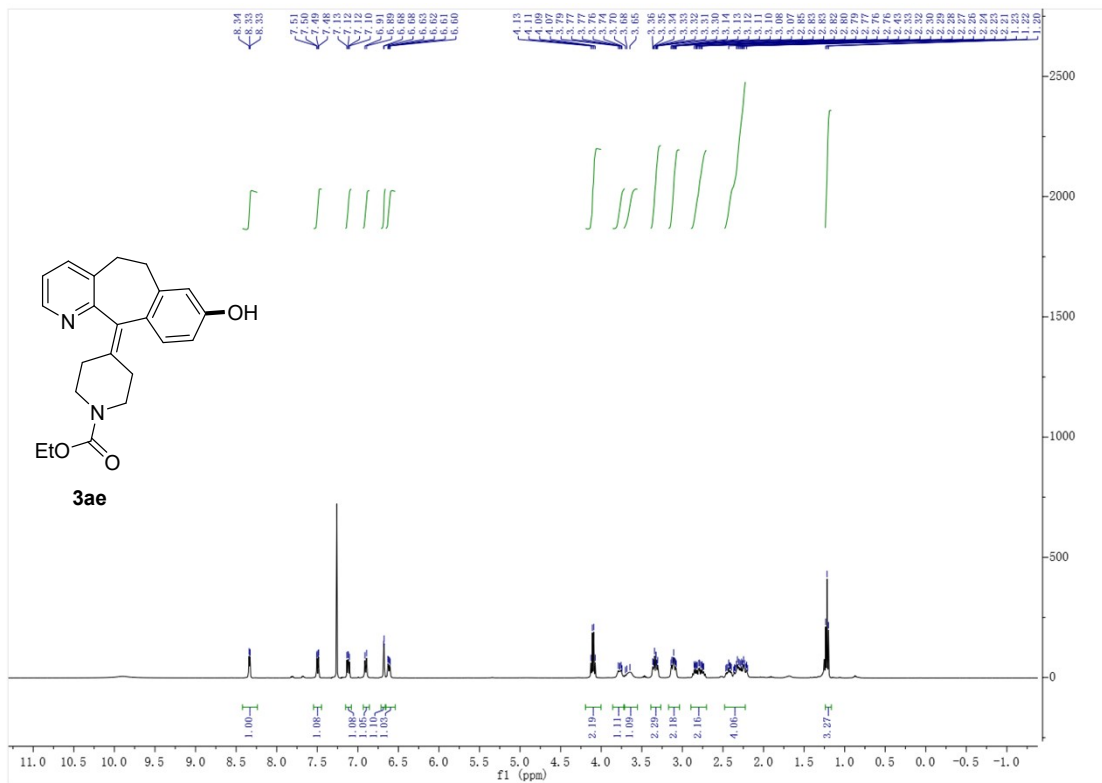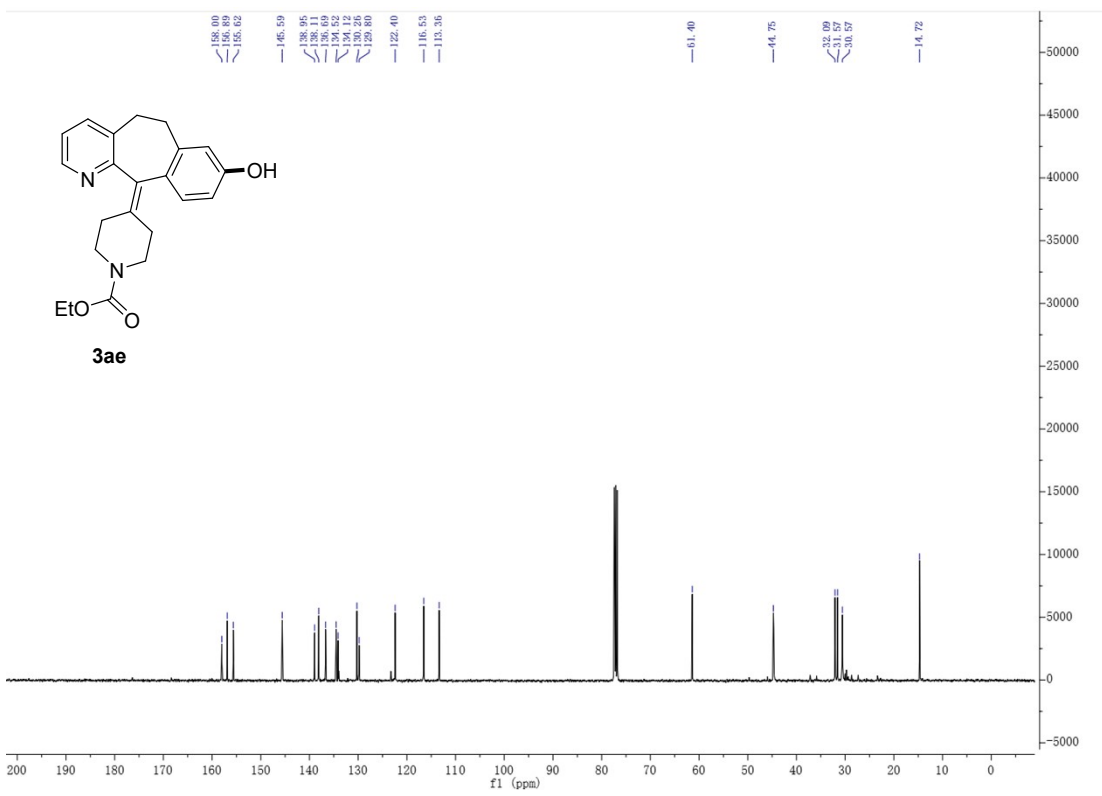

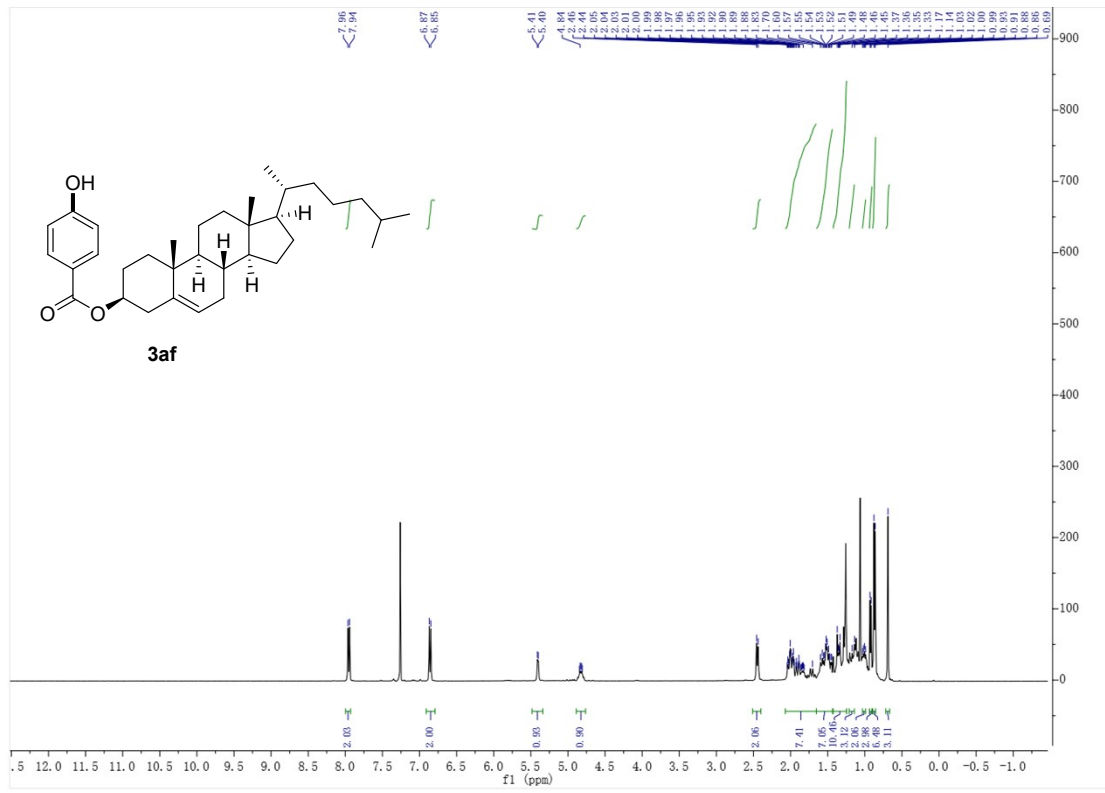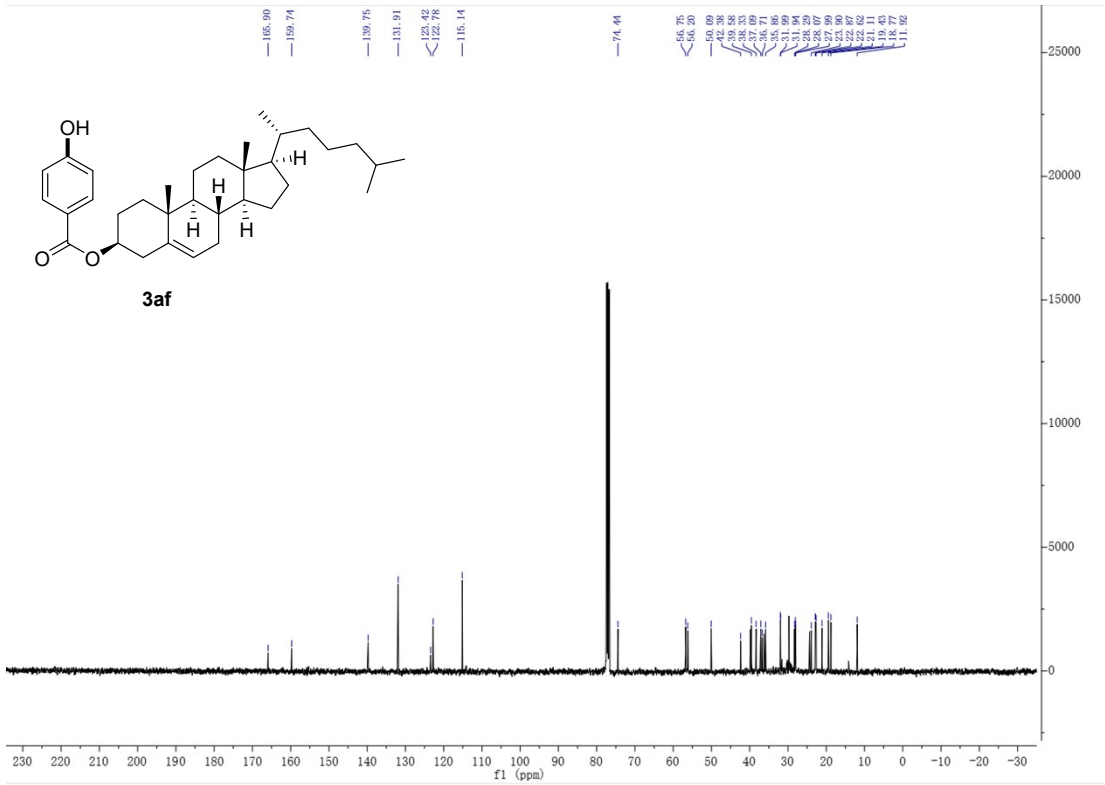

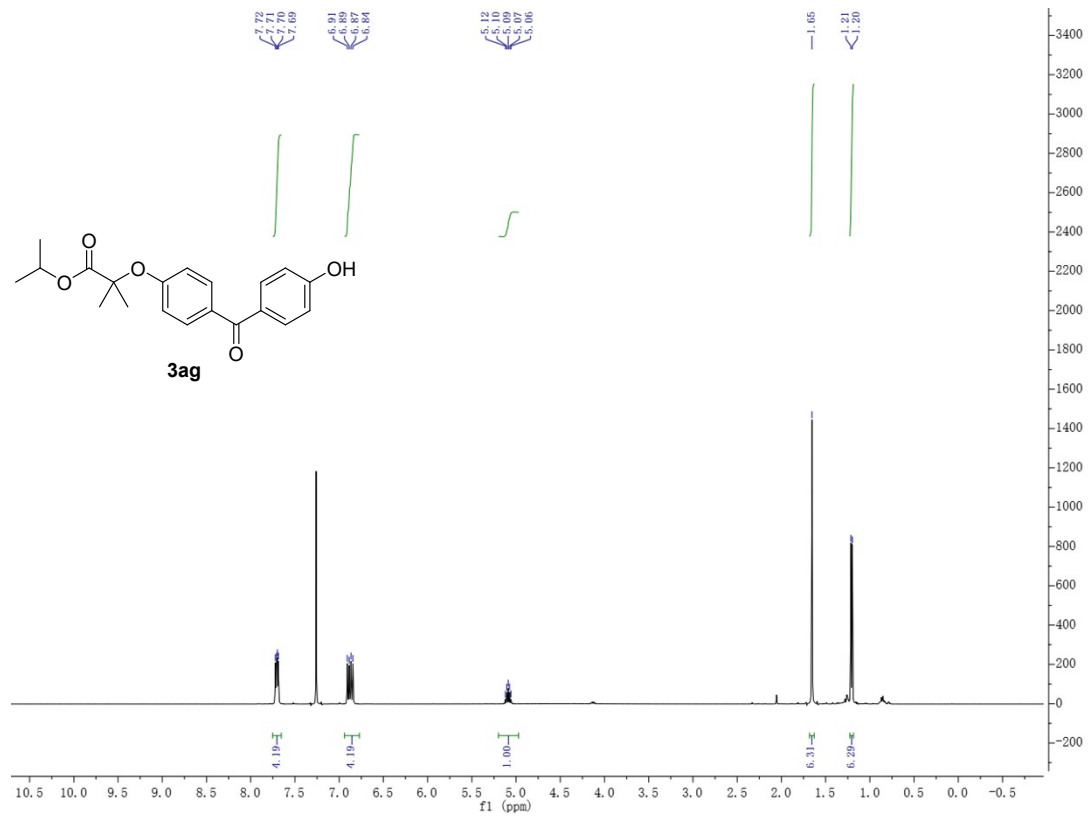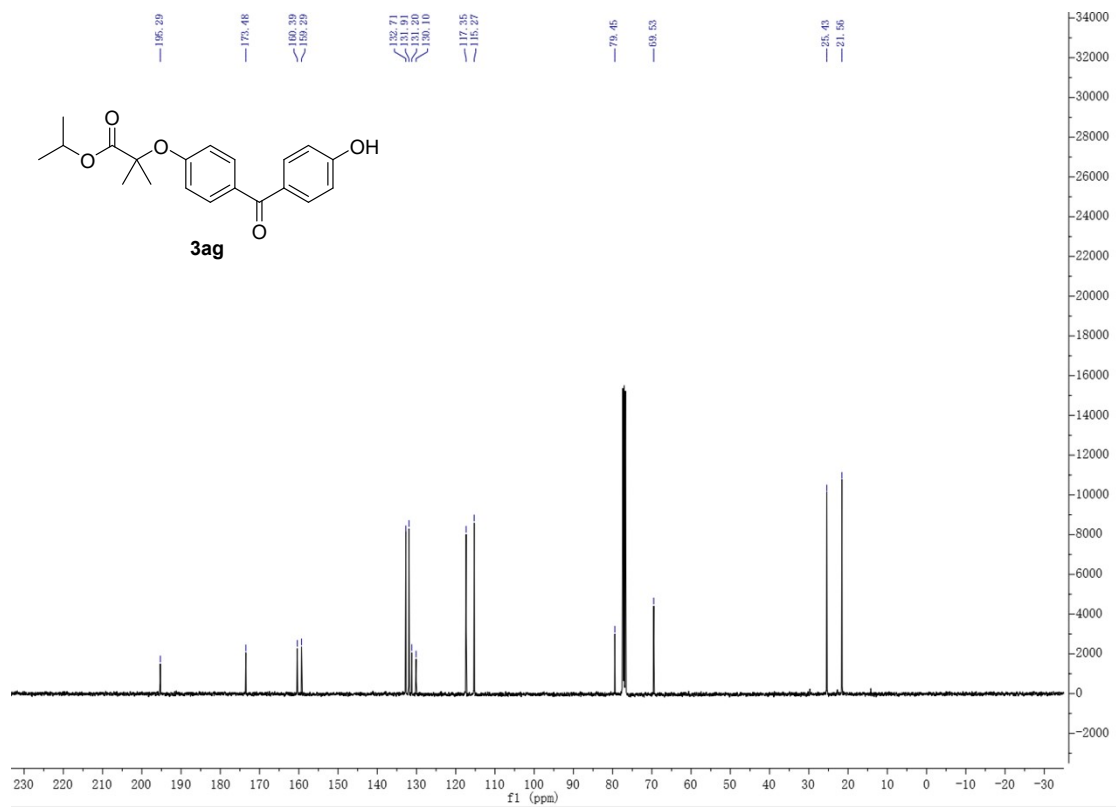

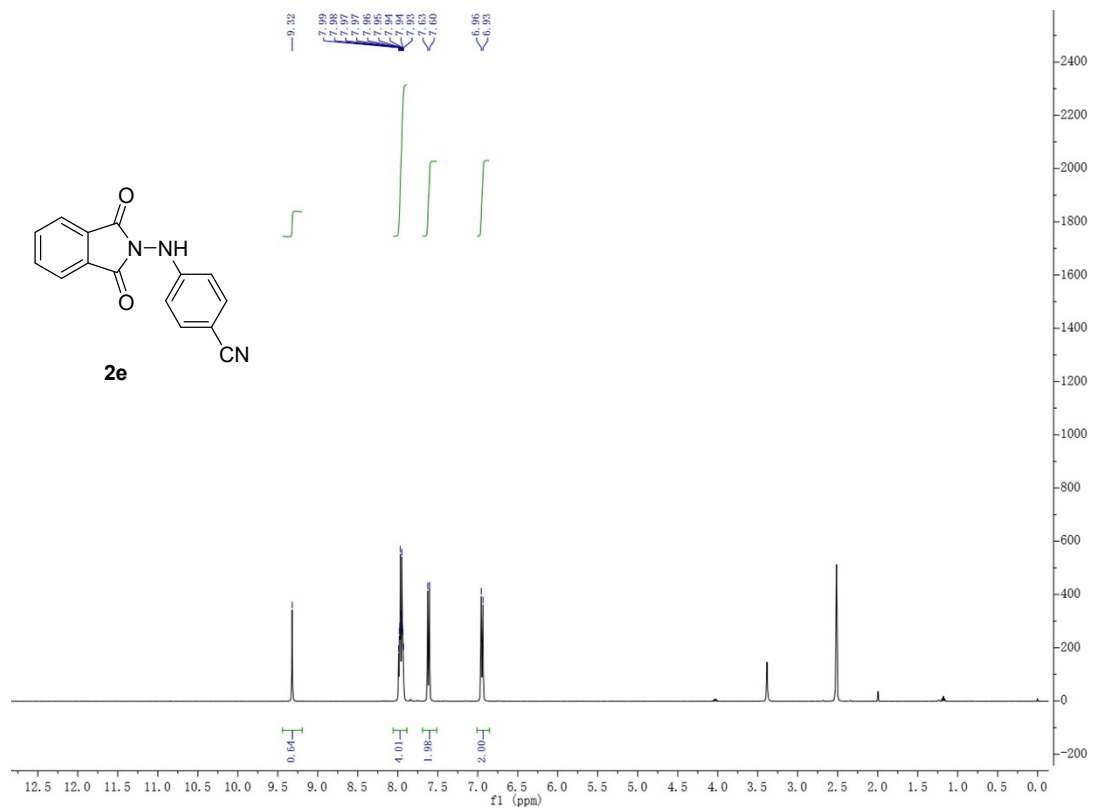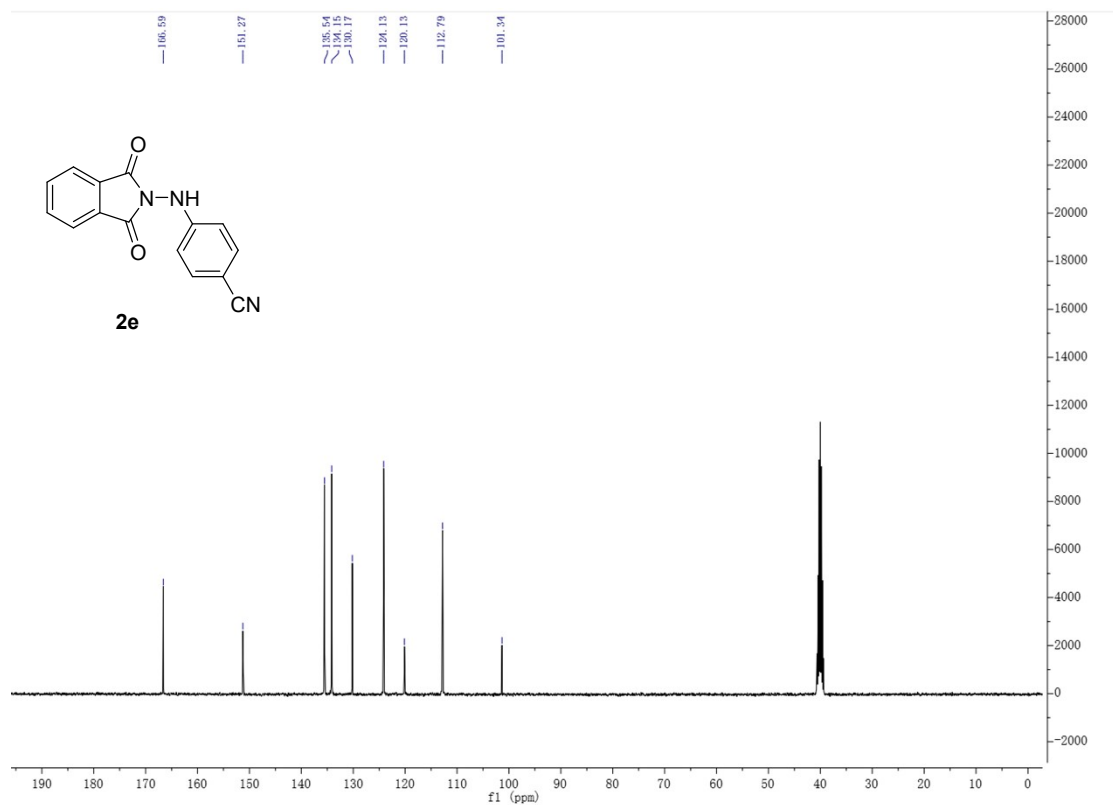

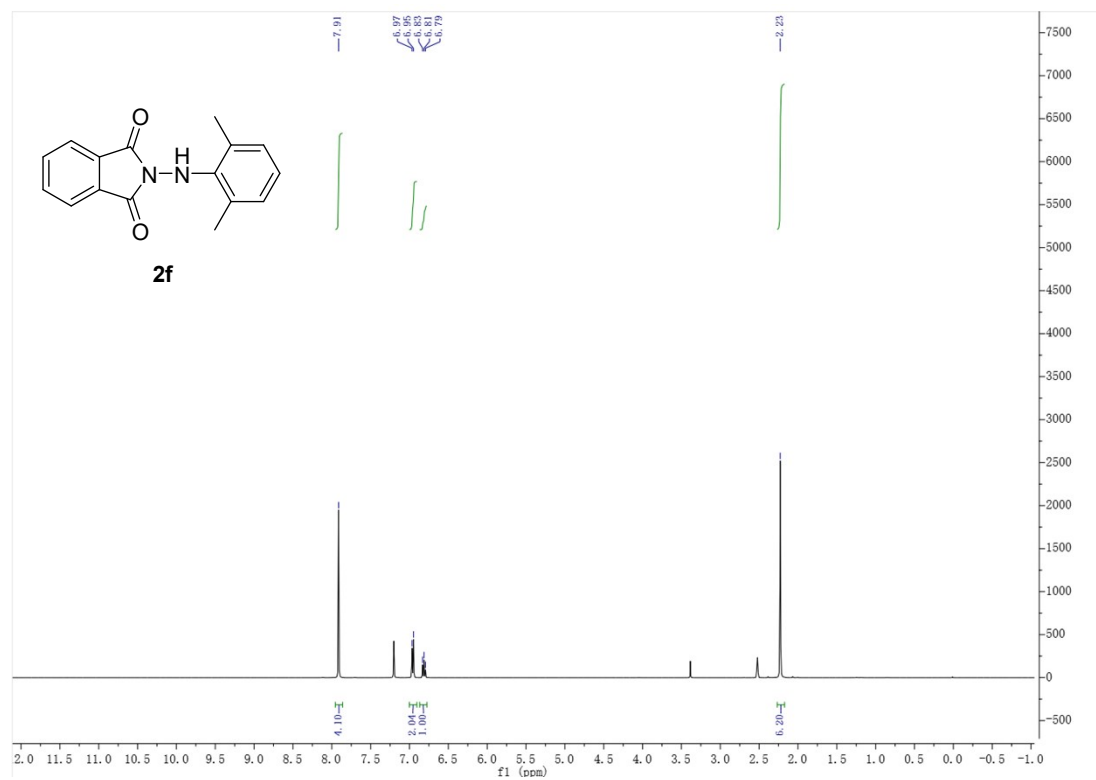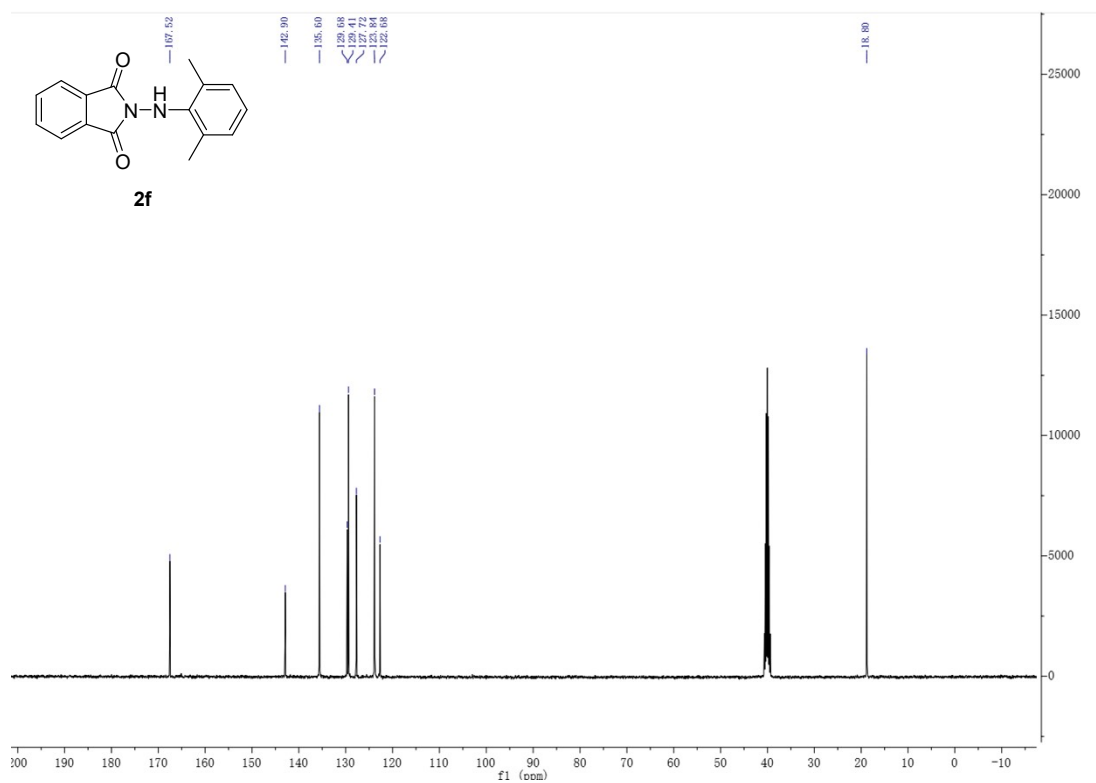



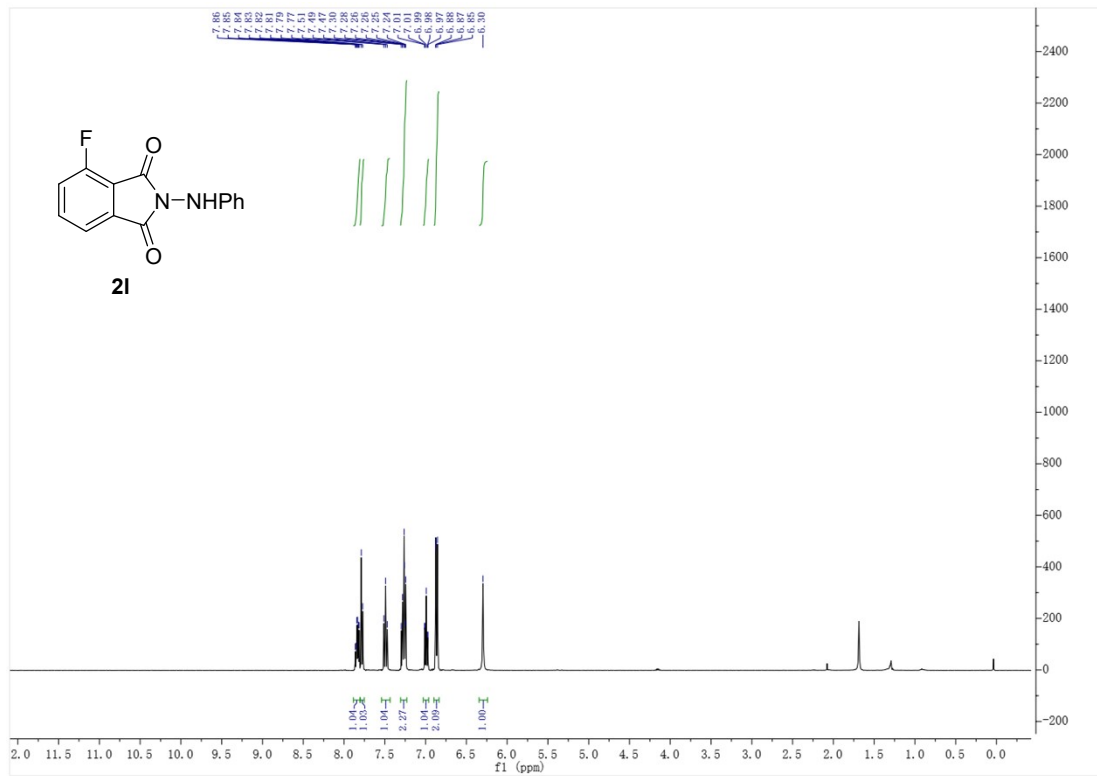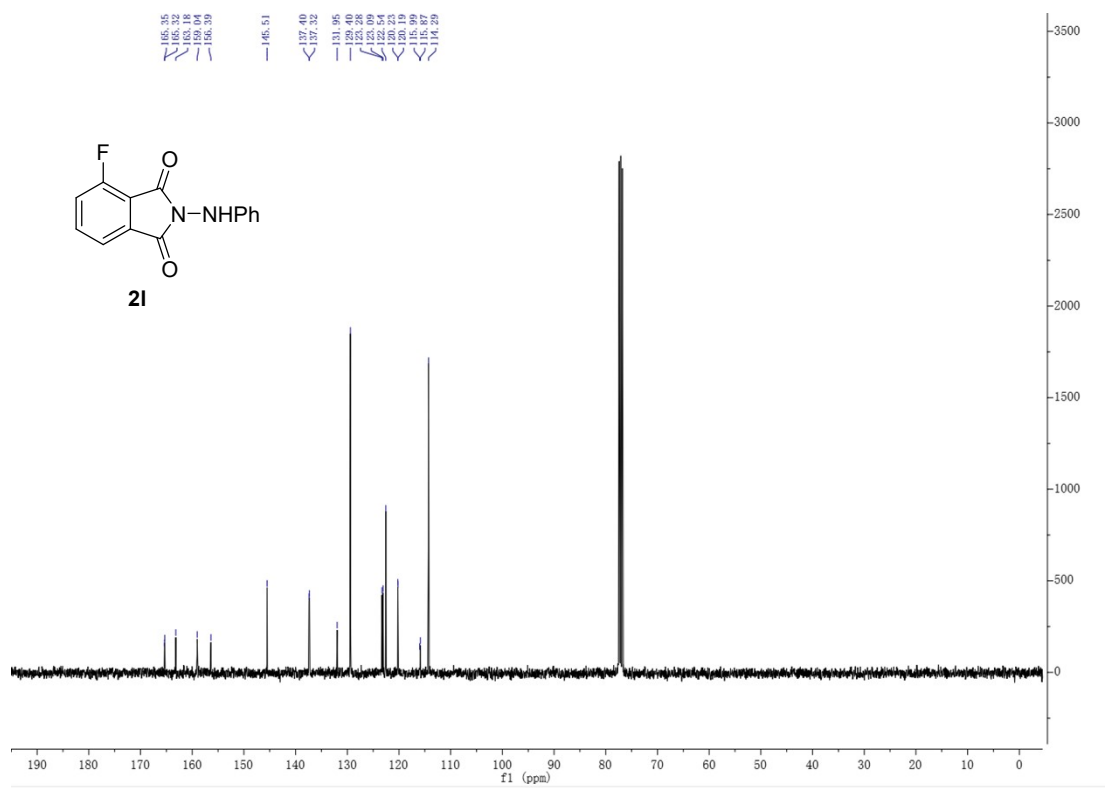

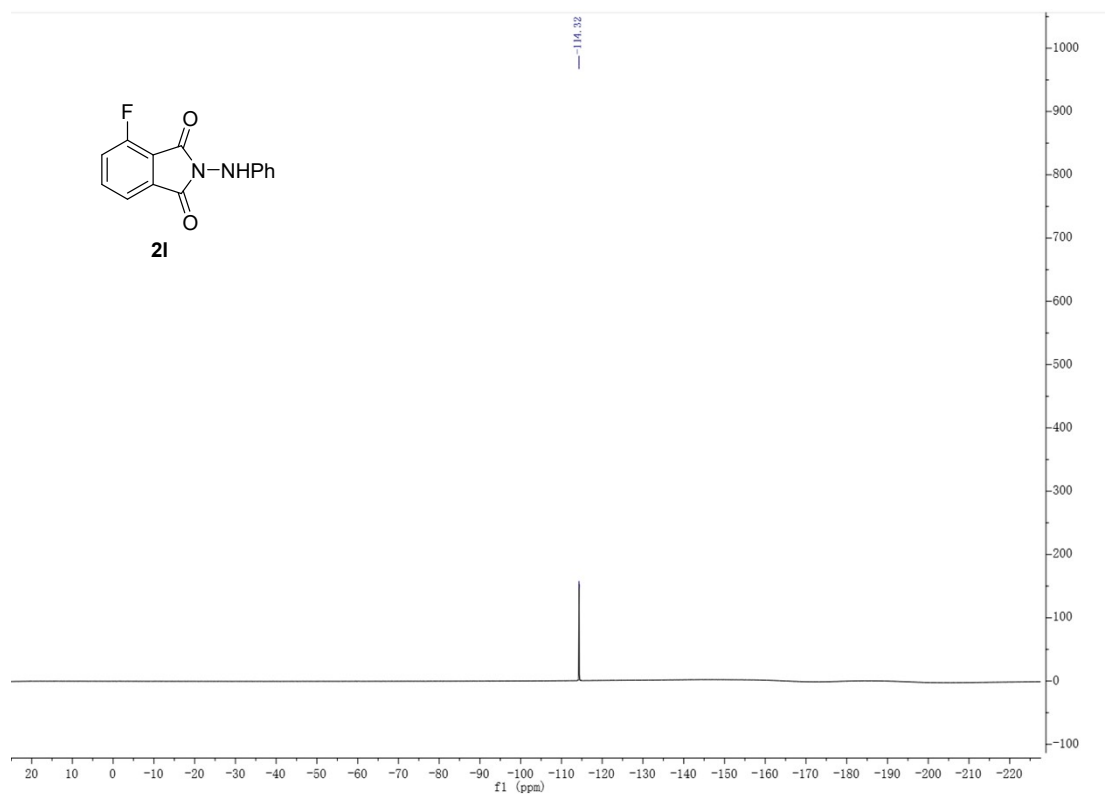

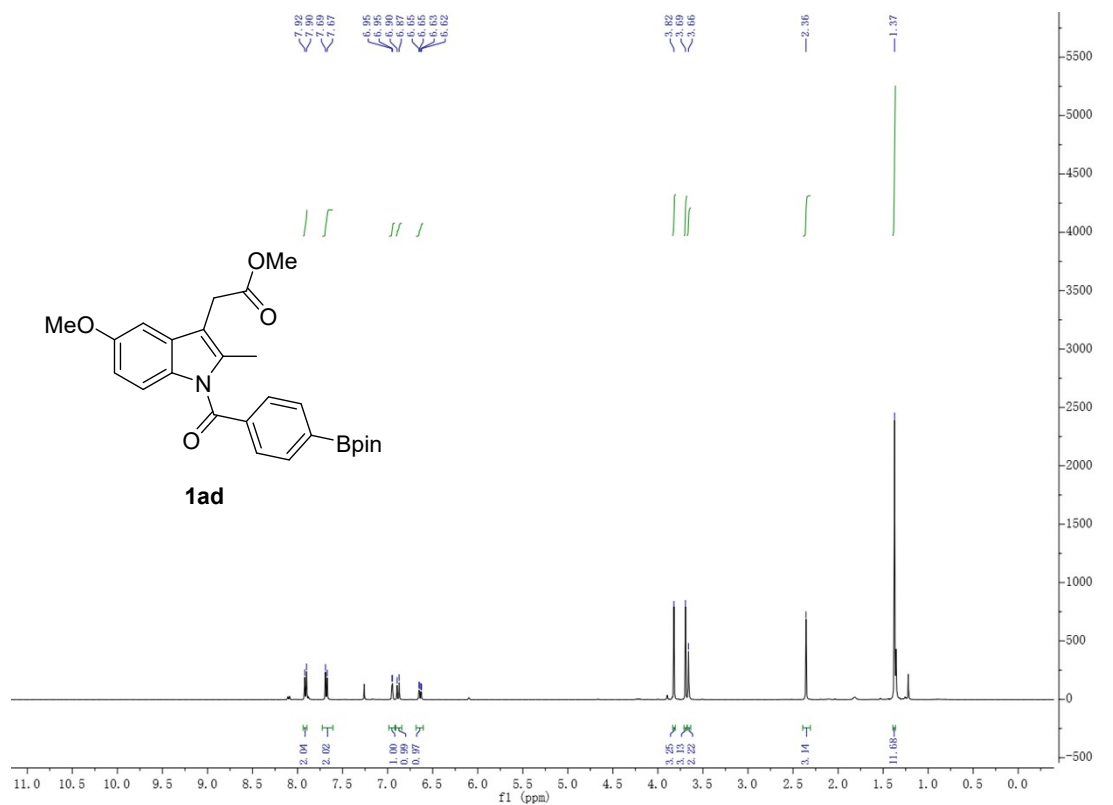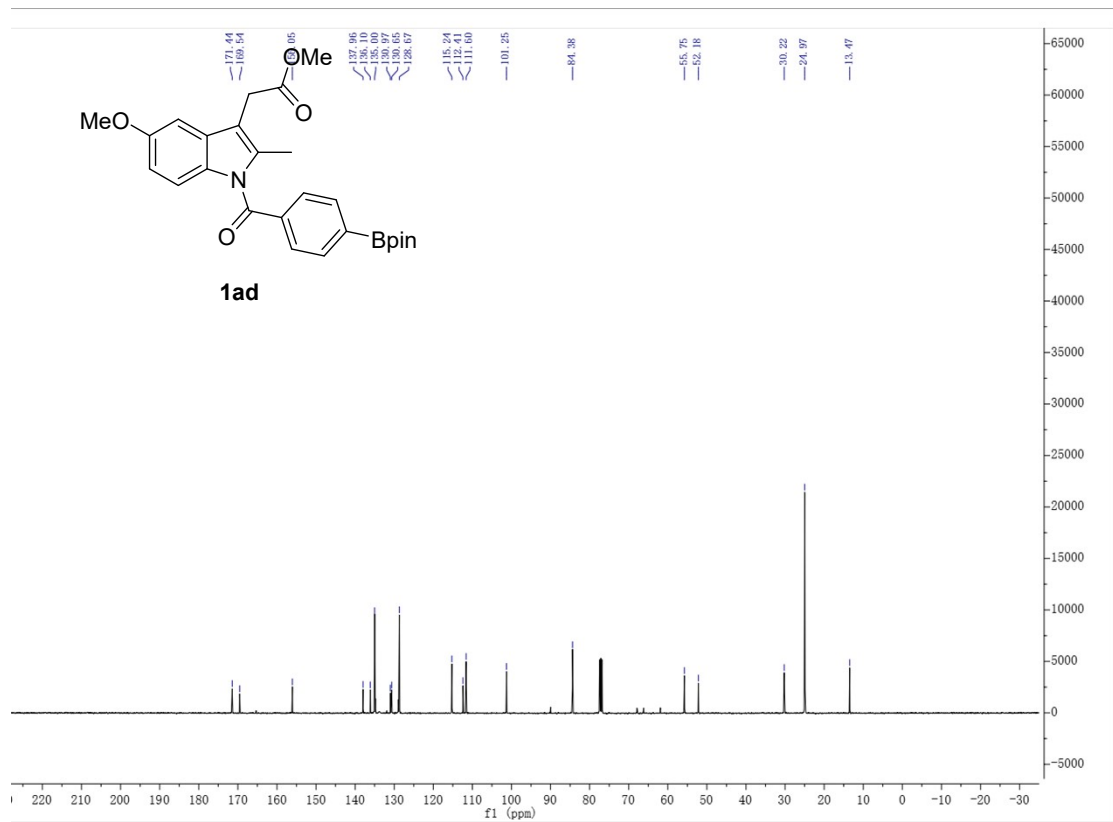

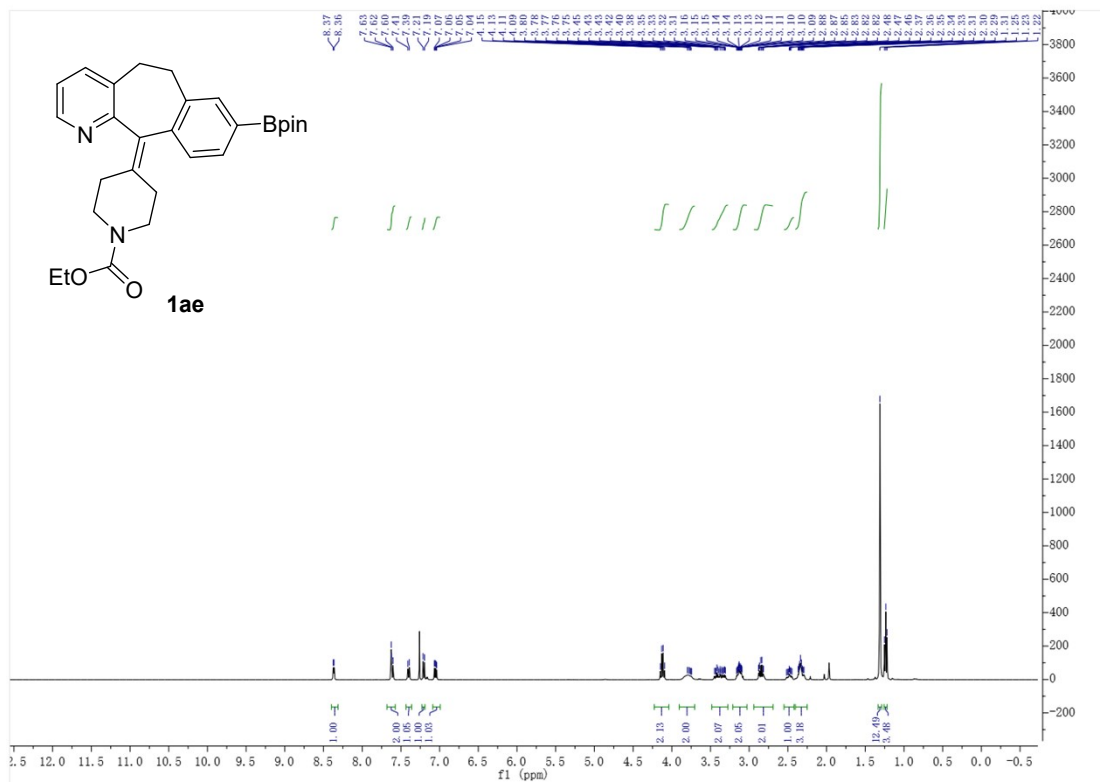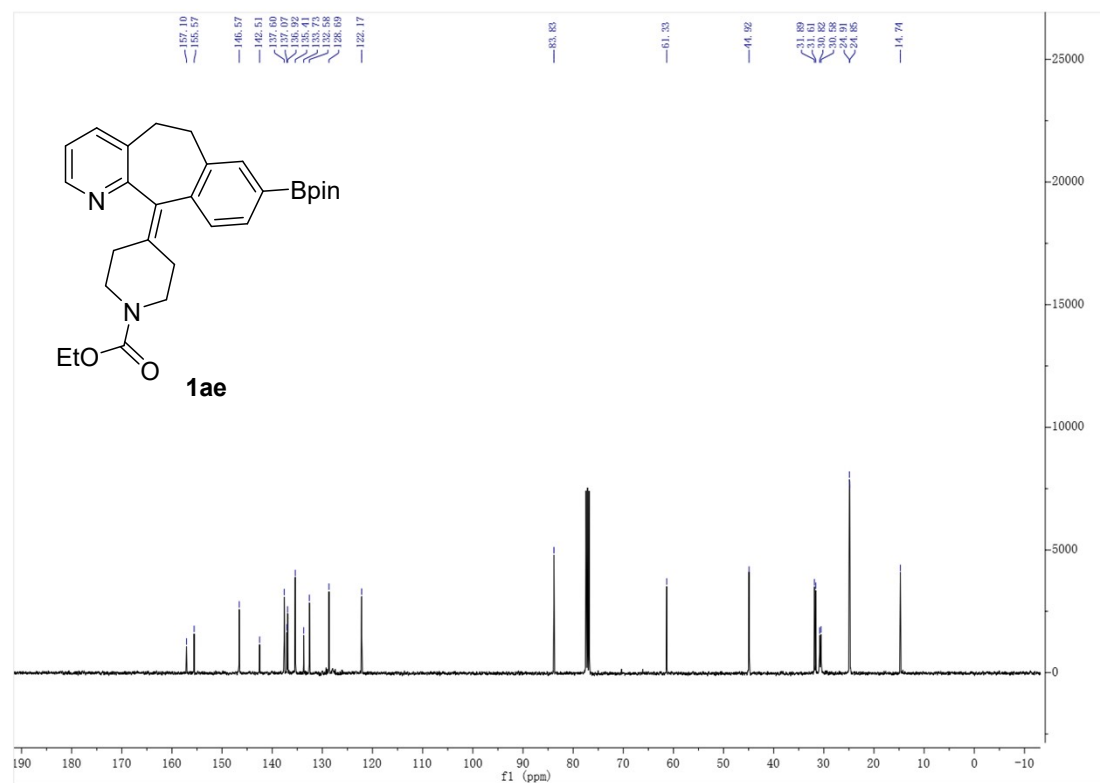

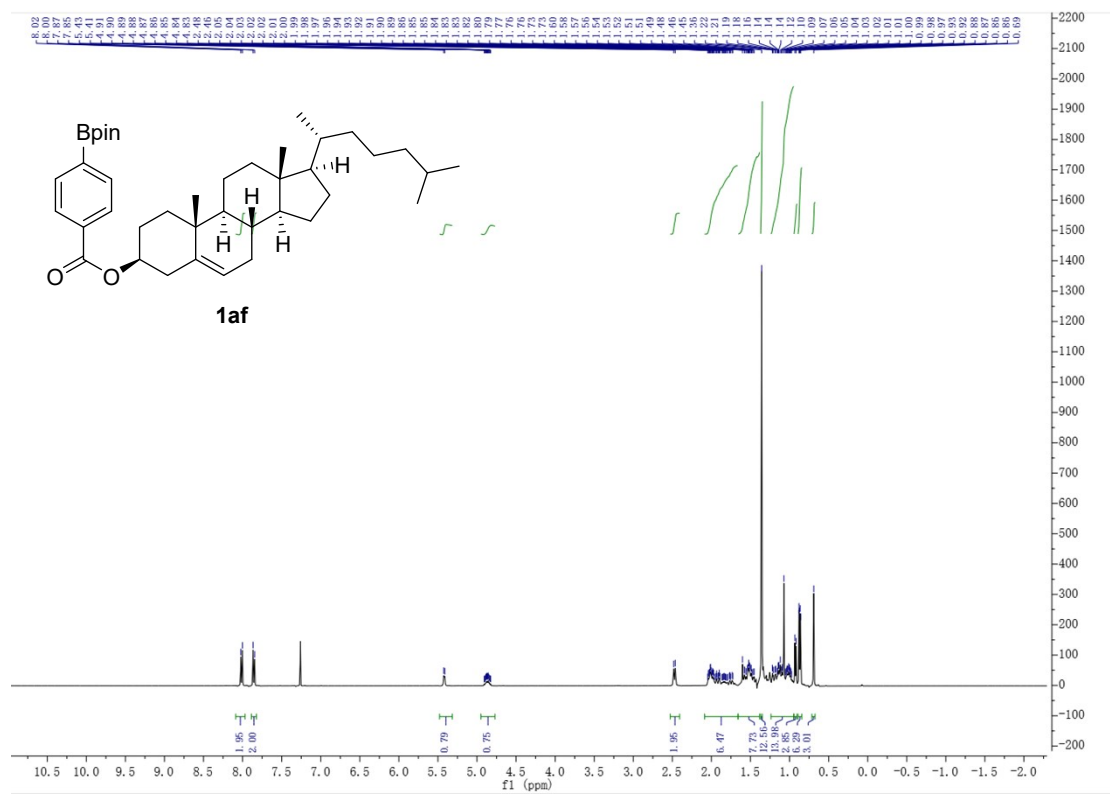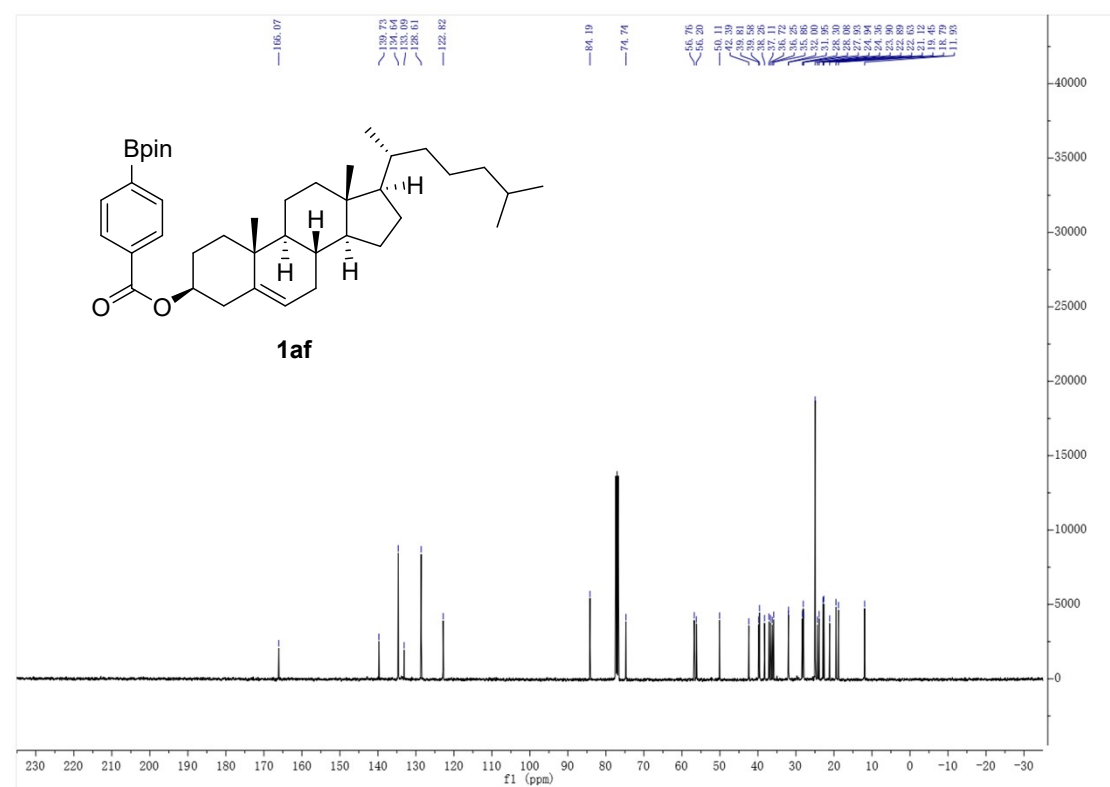

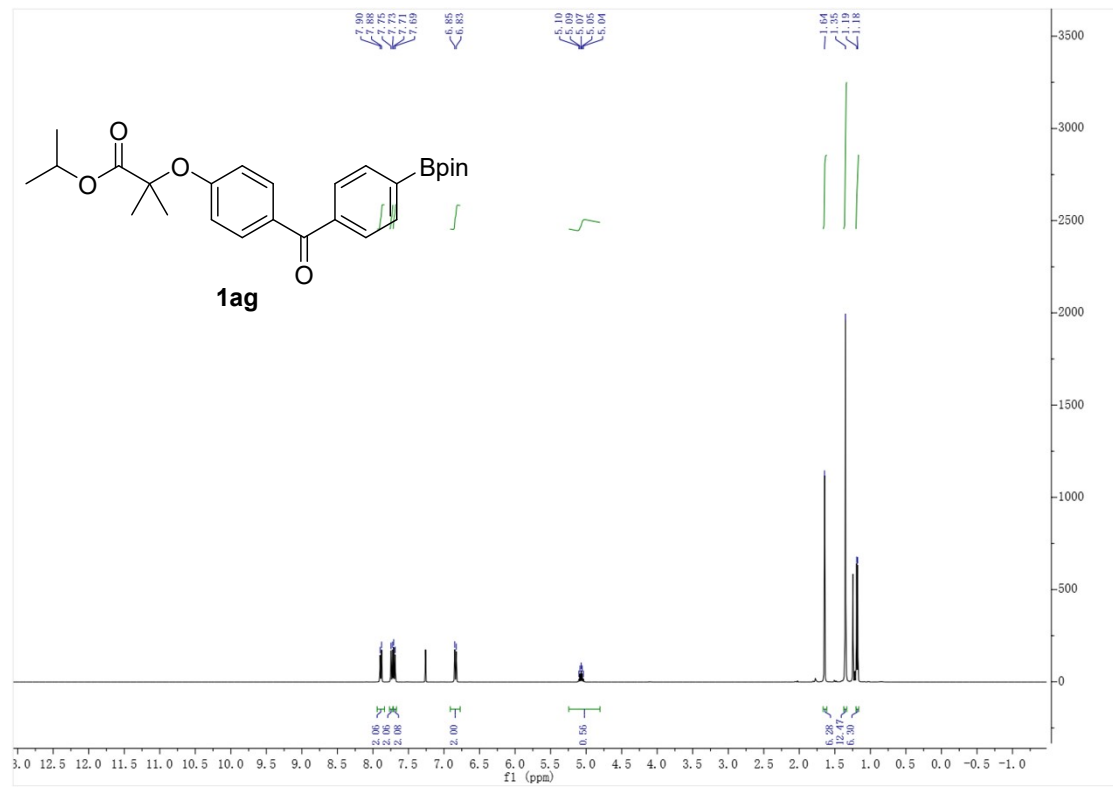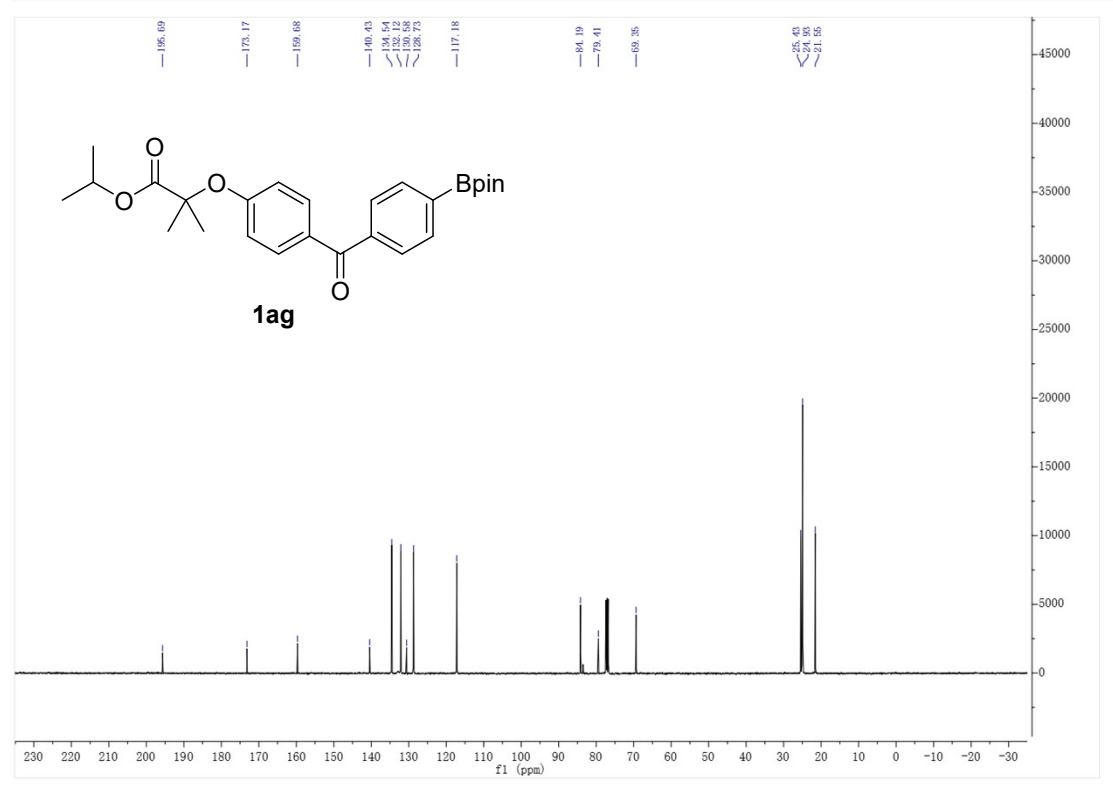

Supplement: d3qo01651j1.pdf [file d3qo01651j1.pdf]
